# Supplementary material for: Systematic Review: Genetic Associations for Prognostic Factors of Urinary Bladder Cancer
Source: PubMed Central journal article supplement — Biomark Cancer. 2019 Dec 30;11:1179299X19897255. doi: 10.1177/1179299X19897255 (PMC6937527; doi:10.1177/1179299x19897255), 2019-12-30
Supplement: Supplementary_Tables_1_12_Sep24_xyz268777d1d25d8.pdf [file Supplementary_Tables_1_12_Sep24_xyz268777d1d25d8.pdf]

1 Supplementary Table 1. A checklist for the Preferred Reporting Items for Systematic Reviews and Meta-analyses (PRISMA).

| Section/topic             | #  | Checklist item                                                                                                                                                                                                                                                                                              | Reported on page # |
|---------------------------|----|-------------------------------------------------------------------------------------------------------------------------------------------------------------------------------------------------------------------------------------------------------------------------------------------------------------|--------------------|
| <b>TITLE</b>              |    |                                                                                                                                                                                                                                                                                                             |                    |
| Title                     | 1  | Identify the report as a systematic review, meta-analysis, or both.                                                                                                                                                                                                                                         | 1                  |
| <b>ABSTRACT</b>           |    |                                                                                                                                                                                                                                                                                                             |                    |
| Structured summary        | 2  | Provide a structured summary including, as applicable: background; objectives; data sources; study eligibility criteria, participants, and interventions; study appraisal and synthesis methods; results; limitations; conclusions and implications of key findings; systematic review registration number. | 2                  |
| <b>INTRODUCTION</b>       |    |                                                                                                                                                                                                                                                                                                             |                    |
| Rationale                 | 3  | Describe the rationale for the review in the context of what is already known.                                                                                                                                                                                                                              | 3                  |
| Objectives                | 4  | Provide an explicit statement of questions being addressed with reference to participants, interventions, comparisons, outcomes, and study design (PICOS).                                                                                                                                                  | 3, 4               |
| <b>METHODS</b>            |    |                                                                                                                                                                                                                                                                                                             |                    |
| Protocol and registration | 5  | Indicate if a review protocol exists, if and where it can be accessed (e.g., Web address), and, if available, provide registration information including registration number.                                                                                                                               | -                  |
| Eligibility criteria      | 6  | Specify study characteristics (e.g., PICOS, length of follow-up) and report characteristics (e.g., years considered, language, publication status) used as criteria for eligibility, giving rationale.                                                                                                      | 5                  |
| Information sources       | 7  | Describe all information sources (e.g., databases with dates of coverage, contact with study authors to identify additional studies) in the search and date last searched.                                                                                                                                  | 5                  |
| Search                    | 8  | Present full electronic search strategy for at least one database, including any limits used, such that it could be repeated.                                                                                                                                                                               | 5                  |
| Study selection           | 9  | State the process for selecting studies (i.e., screening, eligibility, included in systematic review, and, if applicable, included in the meta-analysis).                                                                                                                                                   | 5, Figure 1        |
| Data collection process   | 10 | Describe method of data extraction from reports (e.g., piloted forms, independently, in duplicate) and any processes for obtaining and confirming data from investigators.                                                                                                                                  | -                  |
| Data items                | 11 | List and define all variables for which data were sought (e.g., PICOS, funding sources) and any assumptions and simplifications made.                                                                                                                                                                       | 6                  |

|                                    |    |                                                                                                                                                                                                                        |   |
|------------------------------------|----|------------------------------------------------------------------------------------------------------------------------------------------------------------------------------------------------------------------------|---|
| Risk of bias in individual studies | 12 | Describe methods used for assessing risk of bias of individual studies (including specification of whether this was done at the study or outcome level), and how this information is to be used in any data synthesis. | 6 |
| Summary measures                   | 13 | State the principal summary measures (e.g., risk ratio, difference in means).                                                                                                                                          | - |
| Synthesis of results               | 14 | Describe the methods of handling data and combining results of studies, if done, including measures of consistency (e.g., $I^2$ ) for each meta-analysis.                                                              | 6 |

| Section/topic                 | #  | Checklist item                                                                                                                                                                                           | Reported on page #          |
|-------------------------------|----|----------------------------------------------------------------------------------------------------------------------------------------------------------------------------------------------------------|-----------------------------|
| Risk of bias across studies   | 15 | Specify any assessment of risk of bias that may affect the cumulative evidence (e.g., publication bias, selective reporting within studies).                                                             | 6, 9                        |
| Additional analyses           | 16 | Describe methods of additional analyses (e.g., sensitivity or subgroup analyses, meta-regression), if done, indicating which were pre-specified.                                                         | 6, 7                        |
| <b>RESULTS</b>                |    |                                                                                                                                                                                                          |                             |
| Study selection               | 17 | Give numbers of studies screened, assessed for eligibility, and included in the review, with reasons for exclusions at each stage, ideally with a flow diagram.                                          | Figure 1                    |
| Study characteristics         | 18 | For each study, present characteristics for which data were extracted (e.g., study size, PICOS, follow-up period) and provide the citations.                                                             | 6, Supplementary Tables 2-8 |
| Risk of bias within studies   | 19 | Present data on risk of bias of each study and, if available, any outcome level assessment (see item 12).                                                                                                | 6                           |
| Results of individual studies | 20 | For all outcomes considered (benefits or harms), present, for each study: (a) simple summary data for each intervention group (b) effect estimates and confidence intervals, ideally with a forest plot. | Supplementary Tables 2-8    |
| Synthesis of results          | 21 | Present results of each meta-analysis done, including confidence intervals and measures of consistency.                                                                                                  | -                           |
| Risk of bias across studies   | 22 | Present results of any assessment of risk of bias across studies (see Item 15).                                                                                                                          | 6                           |
| Additional analysis           | 23 | Give results of additional analyses, if done (e.g., sensitivity or subgroup analyses, meta-regression [see Item 16]).                                                                                    | 11, 12                      |
| <b>DISCUSSION</b>             |    |                                                                                                                                                                                                          |                             |
| Summary of evidence           | 24 | Summarize the main findings including the strength of evidence for each main outcome; consider their relevance to key groups (e.g., healthcare providers, users, and policy makers).                     | 13-15                       |

|                |    |                                                                                                                                                               |        |
|----------------|----|---------------------------------------------------------------------------------------------------------------------------------------------------------------|--------|
| Limitations    | 25 | Discuss limitations at study and outcome level (e.g., risk of bias), and at review-level (e.g., incomplete retrieval of identified research, reporting bias). | 13, 14 |
| Conclusions    | 26 | Provide a general interpretation of the results in the context of other evidence, and implications for future research.                                       | 14,15  |
| <b>FUNDING</b> |    |                                                                                                                                                               |        |
| Funding        | 27 | Describe sources of funding for the systematic review and other support (e.g., supply of data); role of funders for the systematic review.                    | 15,16  |

4  
5  
6  
7  
8

*From:* Moher D, Liberati A, Tetzlaff J, Altman DG, The PRISMA Group (2009). Preferred Reporting Items for Systematic Reviews and Meta-Analyses: The PRISMA Statement. PLoS Med 6(7): e1000097. doi:10.1371/journal.pmed1000097

For more information, visit: [www.prisma-statement.org](http://www.prisma-statement.org).

9 Supplementary Table 2. Summary associations for previously reported SNPs on age at the time of diagnosis for urinary bladder cancer.

| Outcome                                             | Year | Study               | Patient subgroup          | Cancer subtype | Ethnic background             | Sample size (Cases/Controls)                 | SNP                     | Locus    | Gene          | EA | RA | EAF               | Effect Size          | 95% CI       | p value |
|-----------------------------------------------------|------|---------------------|---------------------------|----------------|-------------------------------|----------------------------------------------|-------------------------|----------|---------------|----|----|-------------------|----------------------|--------------|---------|
| <b>An increase in age at the time of diagnosis:</b> |      |                     |                           |                |                               |                                              |                         |          |               |    |    |                   |                      |              |         |
| >56 years                                           | 2009 | Stern et al. [1]    | Low-risk NMIBC (Ta+G1/G2) | UC             | Caucasian (Northern American) | 297 (>55 years) / 201 (≤55 years)            | rs710521                | 3q28     | TP63          | A  | G  | 0.80 (1KG)        | OR (A/G)=1.77        | 1.22-2.56    | <0.05   |
| ≥65 years / Age of healthy controls                 | 2010 | Yuan et al. [2]     | UBC                       | UC             | Chinese                       | 214 (UBC cases) / 212 (Healthy controls)     | G870A (rs9344)          | 11q13.3  | CCND1         | A  | G  | 0.41 (1KG)        | OR (AG+AA/GG)=1.74   | 1.06-2.88    | 0.029   |
| >65 years                                           | 2012 | Ma et al. [3]       | UBC                       | UC             | Chinese                       | 450 (GG) / 808 (CG+CC)                       | rs1052133               | 3p25.3   | OGG1          | G  | C  | 0.30 (1KG)        | OR (GG/CG+CC)=1.31   | 1.04-1.66    | p<0.05  |
| >65 years                                           | 2013 | Chu et al. [4]      | UBC                       | UC             | Chinese                       | 475 (CC) / 632 (CT+TT)                       | 3'UTR 774T>C (rs884225) | 7p11.2   | EGFR          | C  | T  | 0.19 (1KG)        | OR (CC/CT+TT)=1.87   | 1.39-2.53    | <0.05   |
| >65 years                                           | 2008 | Wang et al. [5]     | UBC                       | UC             | Chinese                       | 103 (Age >65 years) / 113 (Healthy controls) | 6721G>T (rs7003908)     | 8q11.21  | XRCC7 (PRKDC) | T  | G  | 0.33 (1KG)        | OR (TT/GT+GG)=2.27   | 1.25-4.10    | 0.007   |
| >60 years                                           | 2018 | Wang et al. [6]     | UBC                       | Not reported   | Chinese                       | 690 (AG+AA) / 1015 (GG)                      | rs874945                | 12q13.13 | HOTAIR        | A  | G  | 0.36 (1KG)        | OR (AA+AG/GG)=1.35   | 1.10-1.65    | 0.004   |
| <b>A decrease in age at the time of diagnosis:</b>  |      |                     |                           |                |                               |                                              |                         |          |               |    |    |                   |                      |              |         |
| ≤60 years                                           | 2016 | Hua et al. [7]      | UBC                       | UC             | Chinese                       | 60 (AA) / 296 (GG+GA)                        | rs217727                | 11p15.5  | H19 (lncRNA)  | A  | G  | 0.36 / 0.20 (1KG) | OR (AA / GG+GA)=1.80 | 1.16-2.81    | 0.009   |
| ≤65 years / Healthy controls                        | 2009 | Wang et al. [8]     | UBC                       | UC             | Chinese                       | 203 (≤65 years) / 238 (Healthy controls)     | rs9642880               | 8q24.21  | CASC11        | T  | G  | 0.54 (1KG)        | OR (GT+TT/GG)=2.31   | 1.56-3.43    | <0.0001 |
| ≥50 years                                           | 2004 | Kelsey et al. [9]   | UBC                       | UC + Other     | Caucasian (Northern American) | 29 (AA) / 294 (AG+GG)                        | Codon 399 (rs25487)     | 19q13.2  | XRCC1         | A  | G  | 0.26 (1KG)        | OR (AA / AG+GG)=0.6  | 0.3-0.9      | <0.05   |
| Age, years                                          | 2010 | Kiemeny et al. [10] | UBC                       | UC             | European (Multiple)           | 4211                                         | rs798766                | 4p16.3   | TACC3/FGFR3   | T  | C  | 0.23 / 0.24 (1KG) | $\beta$ =-0.81       | -1.35; -0.26 | 0.0036  |

|           |      |                  |     |              |         |                                    |           |         |       |   |   |            |                     |             |        |
|-----------|------|------------------|-----|--------------|---------|------------------------------------|-----------|---------|-------|---|---|------------|---------------------|-------------|--------|
| >65 years | 2015 | Xiao et al. [11] | UBC | Not reported | Chinese | 548 (UBC) / 709 (Healthy controls) | rs1057868 | 7q11.23 | POR   | T | C | 0.29 (1KG) | OR (TT/CT+CC)=0.586 | 0.417-0.823 | 0.002  |
| >60 years | 2017 | Lin et al. [12]  | UBC | UC           | Chinese | 673 (AG+GG) / 1015 (AA)            | rs710886  | 8q24.21 | PCAT1 | G | A | 0.47 (1KG) | OR (AG+GG/AA)=0.77  | 0.67-0.88   | <0.001 |

CI-confidence interval; EA-effect allele; EAF-effect allele frequency; NMIBC-non-muscle-invasive bladder cancer; OR-odds ratio; RA-reference allele; SNP-single nucleotide polymorphism; UBC-urinary bladder cancer; UC-urothelial carcinoma; 1KG-1000 Genomes Project.

## REFERENCES

1. Stern MC, Van Den Berg D, Yuan JM, Conti DV, Gago-Dominguez M, Pike MC, Xiang YB, Gao YT, Cortessis VK. Sequence variant on 3q28 and urinary bladder cancer risk: findings from the Los Angeles-Shanghai bladder case-control study. *Cancer epidemiology, biomarkers & prevention : a publication of the American Association for Cancer Research, cosponsored by the American Society of Preventive Oncology.* 2009;18(11):3057-61.
2. Yuan L, Gu X, Shao J, Wang M, Wang M, Zhu Q, Zhang Z. Cyclin D1 G870A polymorphism is associated with risk and clinicopathologic characteristics of bladder cancer. *DNA and cell biology.* 2010;29(10):611-7.
3. Ma L, Chu H, Wang M, Shi D, Zhong D, Li P, Tong N, Yin C, Zhang Z. hOGG1 Ser326Cys polymorphism is associated with risk of bladder cancer in a Chinese population: a case-control study. *Cancer science.* 2012;103(7):1215-20.
4. Chu H, Wang M, Jin H, Lv Q, Wu D, Tong N, Ma L, Shi D, Zhong D, Fu G, Yuan L, Qin C, Yin C, Zhang Z. EGFR 3'UTR 774T>C polymorphism contributes to bladder cancer risk. *Mutagenesis.* 2013;28(1):49-55.
5. Wang SY, Peng L, Li CP, Li AP, Zhou JW, Zhang ZD, Liu QZ. Genetic variants of the XRCC7 gene involved in DNA repair and risk of human bladder cancer. *International journal of urology : official journal of the Japanese Urological Association.* 2008;15(6):534-9.
6. Wang X, Wang W, Zhang Q, Gu D, Zhang K, Ge Y, Chu H, Du M, Xu B, Wang M, Lv X, Zhang Z, Yuan L, Gong W. Tagging SNPs in the HOTAIR gene are associated with bladder cancer risk in a Chinese population. *Gene.* 2018;664:22-6.
7. Hua Q, Lv X, Gu X, Chen Y, Chu H, Du M, Gong W, Wang M, Zhang Z. Genetic variants in lncRNA H19 are associated with the risk of bladder cancer in a Chinese population. *Mutagenesis.* 2016;31(5):531-8.
8. Wang M, Wang M, Zhang W, Yuan L, Fu G, Wei Q, Zhang Z. Common genetic variants on 8q24 contribute to susceptibility to bladder cancer in a Chinese population. *Carcinogenesis.* 2009;30(6):991-6.
9. Kelsey KT, Park S, Nelson HH, Karagas MR. A population-based case-control study of the XRCC1 Arg399Gln polymorphism and susceptibility to bladder cancer. *Cancer epidemiology, biomarkers & prevention : a publication of the American Association for Cancer Research, cosponsored by the American Society of Preventive Oncology.* 2004;13(8):1337-41.

- 36 10. Kiemeney LA, Sulem P, Besenbacher S, Vermeulen SH, Sigurdsson A, Thorleifsson G, Gudbjartsson DF, Stacey SN, Gudmundsson J,  
37 Zanon C, Kostic J, Masson G, Bjarnason H, Palsson ST, Skarphedinsson OB, Gudjonsson SA, Witjes JA, Grotenhuis AJ, Verhaegh GW, Bishop DT,  
38 Sak SC, Choudhury A, Elliott F, Barrett JH, Hurst CD, de Verdier PJ, Ryk C, Rudnai P, Gurzau E, Koppova K, Vineis P, Polidoro S, Guarrera S,  
39 Sacerdote C, Campagna M, Placidi D, Arici C, Zeegers MP, Kellen E, Gutierrez BS, Sanz-Velez JI, Sanchez-Zalabardo M, Valdivia G, Garcia-Prats  
40 MD, Hengstler JG, Blaszewicz M, Dietrich H, Ophoff RA, van den Berg LH, Alexiusdottir K, Kristjansson K, Geirsson G, Nikulasson S, Petursdottir  
41 V, Kong A, Thorgeirsson T, Mungan NA, Lindblom A, van Es MA, Porru S, Buntinx F, Golka K, Mayordomo JI, Kumar R, Matullo G, Steineck G,  
42 Kiltie AE, Aben KKH, Jonsson E, Thorsteinsdottir U, Knowles MA, Rafnar T, Stefansson K. A sequence variant at 4p16.3 confers susceptibility to  
43 urinary bladder cancer. *Nature genetics*. 2010;42(5):415-9.
- 44 11. Xiao X, Ma G, Li S, Wang M, Liu N, Ma L, Zhang Z, Chu H, Zhang Z, Wang SL. Functional POR A503V is associated with the risk of bladder  
45 cancer in a Chinese population. *Scientific reports*. 2015;5:11751.
- 46 12. Lin Y, Ge Y, Wang Y, Ma G, Wang X, Liu H, Wang M, Zhang Z, Chu H. The association of rs710886 in lncRNA PCAT1 with bladder cancer  
47 risk in a Chinese population. *Gene*. 2017;627:226-32.
- 48

49 Supplementary Table 3. Summary associations for previously reported SNPs on urinary bladder cancer tumor size at the time of diagnosis.

| Outcome                                            | Year | Study          | Patient subgroup | Cancer subtype | Ethnic background | Sample size (Cases/Controls)      | SNP                 | Locus   | Gene          | EA | RA | EAF        | Effect Size        | 95% CI      | p value |
|----------------------------------------------------|------|----------------|------------------|----------------|-------------------|-----------------------------------|---------------------|---------|---------------|----|----|------------|--------------------|-------------|---------|
| <b>Associations for an increase in tumor size:</b> |      |                |                  |                |                   |                                   |                     |         |               |    |    |            |                    |             |         |
| Tumor size (≥3 cm)                                 | 2014 | Gu et al. [1]  | UBC              | Not reported   | Chinese           | 218 (G3) / 670 (Healthy subjects) | 696 C/T (rs2664139) | 15q14   | TSP-1 (THBS1) | C  | T  | 0.43 (1KG) | OR (CC/TT+CT)=1.94 | 1.22-3.10   | 0.006   |
| <b>Associations for a decrease in tumor size:</b>  |      |                |                  |                |                   |                                   |                     |         |               |    |    |            |                    |             |         |
| Tumor size (T1-T4)                                 | 2018 | Lee et al. [2] | UBC              | UC             | Taiwanese         | 279 (T1-T4) / 90 (Ta)             | rs2929973           | 8q24.22 | WISP1 (CCN4)  | G  | T  | 0.17 (1KG) | OR (TG+GG/TT)=0.61 | 0.371-0.990 | 0.044   |

50 CI-confidence interval; EA-effect allele; EAF-effect allele frequency; OR-odds ratio; RA-reference allele; SNP-single nucleotide polymorphism; UBC-urinary bladder  
51 cancer; UC-urothelial carcinoma; 1KG-1000 Genomes Project.

52  
53 **REFERENCES**

- 54  
55 1. Gu J, Tao J, Yang X, Li P, Yang X, Qin C, Cao Q, Cai H, Zhang Z, Wang M, Gu M, Lu Q, Yin C. Effects of TSP-1-696 C/T polymorphism on  
56 bladder cancer susceptibility and clinicopathologic features. *Cancer genetics*. 2014;207(6):247-52.  
57 2. Lee HL, Chiou HL, Wang SS, Hung SC, Chou MC, Yang SF, Hsieh MJ, Chou YE. WISP1 genetic variants as predictors of tumor development  
58 with urothelial cell carcinoma. *Urologic oncology*. 2018;36(4):160.e15-.e21.  
59

60 Supplementary Table 4. Summary associations for previously reported SNPs on stage at the time of diagnosis for urinary bladder cancer.

| Outcome                                                                                  | Year | Study                  | Patient subgroup | Cancer subtype | Ethnic background             | Sample size (Cases/Controls)            | SNP                         | Locus   | Gene  | EA | RA | EAF                                         | Effect Size          | 95% CI    | p value |
|------------------------------------------------------------------------------------------|------|------------------------|------------------|----------------|-------------------------------|-----------------------------------------|-----------------------------|---------|-------|----|----|---------------------------------------------|----------------------|-----------|---------|
| <b>Associations for stages of Ta/T1/Tis (or combinations of these):</b>                  |      |                        |                  |                |                               |                                         |                             |         |       |    |    |                                             |                      |           |         |
| <b>Associations reducing the risk of stages of Ta/T1/Tis (or combinations of these):</b> |      |                        |                  |                |                               |                                         |                             |         |       |    |    |                                             |                      |           |         |
| Ta+T1                                                                                    | 2004 | Kelsey et al. [1]      | UBC              | UC + Other     | Caucasian (Northern American) | 22 (AA) / 234 (AG+GG)                   | Codon 399 (rs25487)         | 19q13.2 | XRCC1 | A  | G  | 0.26 (1KG)                                  | OR (AA / AG+GG)=0.5  | 0.3-0.9   | <0.05   |
| Ta+T1                                                                                    | 2011 | Safarinejad et al. [2] | UBC (men only)   | UC             | Iranian                       | 102 (Ta+T1)                             | rs2274976                   | 1p36.22 | MTHFR | A  | G  | 0.07 (1KG)                                  | OR (A/G)=0.57        | 0.41-0.75 | 0.012   |
| Ta+T1                                                                                    | 2011 | Safarinejad et al. [2] | UBC (men only)   | UC             | Iranian                       | 102 (Ta+T1)                             | rs1801133                   | 1p36.22 | MTHFR | T  | C  | 0.25 (1KG)                                  | OR (T/C)=0.47        | 0.36-0.68 | 0.001   |
| Ta+T1                                                                                    | 2011 | Safarinejad et al. [2] | UBC (men only)   | UC             | Iranian                       | 102 (Ta+T1)                             | rs1801131                   | 1p36.22 | MTHFR | C  | A  | 0.25 (1KG)                                  | OR (C/A)=0.46        | 0.28-0.71 | 0.001   |
| Ta+T1                                                                                    | 2011 | Sobti et al. [3]       | UBC              | Not reported   | Indian                        | 18 (CC) / 127 (GG)                      | RAD51 135 G/C (rs1801320)   | 15q15.1 | RAD51 | C  | G  | 0.26 (Cases) / 0.31 (Controls) / 0.14 (1KG) | OR (CC/GG)= 0.51     | 0.27-0.99 | 0.031   |
| Ta+T1+Tis / Healthy controls                                                             | 2008 | Verhaegh et al. [4]    | NMIBC            | Not reported   | European (The Netherlands)    | 83 (NMIBC) / 152 (Healthy controls)     | rs2839698                   | 11p15.5 | H19   | C  | T  | 0.71 (1KG)                                  | OR (TC/TT)=0.52      | 0.28-0.94 | <0.05   |
| Ta+T1+Tis / Healthy controls                                                             | 2015 | Zhao et al. [5]        | UBC              | Not reported   | Chinese                       | 76 (Tis+Ta+T1) / 210 (Healthy controls) | 429 CT genotype (rs2227485) | 12q15   | IL22  | T  | C  | 0.48 (all UBC) / 0.49 (1KG)                 | OR (TT / CT+CC)=0.48 | 0.23-0.9  | 0.04    |



|                                                                                             |      |                      |       |              |                     |                                                                    |                             |          |              |   |   |                                             |                    |           |       |
|---------------------------------------------------------------------------------------------|------|----------------------|-------|--------------|---------------------|--------------------------------------------------------------------|-----------------------------|----------|--------------|---|---|---------------------------------------------|--------------------|-----------|-------|
| Ta+T1                                                                                       | 2018 | Ahmed et al. [6]     | NMIBC | UC           | Pakistani           | 248 (NMIBC) / 400 (Controls) (Allele count instead of individuals) | rs861539                    | 14q32.33 | XRCC3        | T | C | 0.22 (1KG)                                  | OR (T/C)=0.63      | 0.43-0.94 | <0.05 |
| <b>Associations increasing the risk for stages of Ta/T1/Tis (or combinations of these):</b> |      |                      |       |              |                     |                                                                    |                             |          |              |   |   |                                             |                    |           |       |
| Ta+T1                                                                                       | 2010 | Yuan et al. [7]      | UBC   | UC           | Chinese             | 255 (Ta+T1) / 402 (Healthy controls)                               | G870A (rs9344)              | 11q13.3  | CCND1        | A | G | 0.41 (1KG)                                  | OR (AG+AA/GG)=1.86 | 1.10-3.16 | 0.021 |
| Ta+T1 / Healthy controls                                                                    | 2002 | Chen et al. [8]      | UBC   | UC           | Taiwanese           | 33 (Ta+T1) / 119 (Healthy controls)                                | Ser31Arg (rs1801270)        | 6p21.2   | P21 (CDKN1A) | A | C | 0.74 (Cases) / 0.57 (Controls) / 0.26 (1KG) | OR (A/C)=2.55      | 1.54-4.79 | 0.012 |
| Ta+T1 / Healthy controls                                                                    | 2008 | Gangwar et al. [9]   | NMIBC | UC           | Indian              | 76 (Ta+T1) / 146 (Healthy controls)                                | Asp312Asn (G>A) (rs1799793) | 19q13.3  | ERCC2        | A | G | 0.19 (1KG)                                  | OR(AA/GG)=4.62     | 2.29-9.29 | 0.003 |
| Ta+T1 / Healthy controls                                                                    | 2009 | Wen et al. [10]      | NMIBC | Not reported | Chinese             | 304 (Cases) / 90 (Healthy controls)                                | Lys939Gln (rs2228001)       | 3p25.1   | XPC          | C | A | 0.32 (1KG)                                  | OR (AC+CC/AA)=1.89 | 1.21-3.24 | 0.02  |
| Ta+T1 / T2+                                                                                 | 2004 | Ichimura et al. [11] | UBC   | UC           | Japanese            | 152 (Ta+T1) / 42 (T2+)                                             | Pro198Leu (rs1050450)       | 3p21.31  | GPX1         | T | C | 0.22 (1KG)                                  | OR (CT/CC)=2.58    | 1.07-6.18 | 0.034 |
| Ta+T1+Tis / Healthy controls                                                                | 2017 | Ali et al. [12]      | UBC   | UC           | Pakistani           | 124 (Ta+T1) / 200 (Healthy controls)                               | rs1137101                   | 1p31.3   | LEPR         | A | G | 0.52 (Cases) / 0.42 (Controls) / 0.42 (1KG) | OR (G/A)=1.4       | 1.04-2    | <0.05 |
| Tis (or multiple tumors)                                                                    | 2011 | Lima et al. [13]     | NMIBC | Not reported | European (Portugal) | 65 (Multiple/CIS) / 52 (Single)                                    | IL4-590C/T (rs2243250)      | 5q31.1   | IL4          | T | C | 0.47 (1KG)                                  | OR (T/C) =2.80     | 1.08-7.27 | 0.031 |

|                          |      |                     |       |    |                   |                                                                    |                      |         |             |   |   |            |                                       |                          |                |
|--------------------------|------|---------------------|-------|----|-------------------|--------------------------------------------------------------------|----------------------|---------|-------------|---|---|------------|---------------------------------------|--------------------------|----------------|
| Tis / Ta+T1              | 2004 | Ito et al. [14]     | NMIBC | UC | Japanese          | 14 (Tis) / 47 (no Tis)                                             | G870A (rs9344)       | 11q13.3 | CCND1       | A | G | 0.41 (1KG) | OR (AG/GG)=3.67<br>OR (AA/AG+GG)=3.94 | 1.00-13.45<br>1.40-11.10 | 0.049<br>0.009 |
| T1                       | 2013 | Pandith et al. [15] | UBC   | UC | Indian            | 18 (TC+CC) / 32 (TT)                                               | rs12628              | 11p15.5 | HRAS        | C | T | 0.30 (1KG) | OR (TC+CC/TT)=3.0                     | 1.50-5.97                | 0.004          |
| Ta+T1 (patients ≤71 yrs) | 2006 | Sakano et al. [16]  | NMIBC | UC | European (Sweden) | 30 (T1) / 83 (Ta)                                                  | Asp1104His (rs17655) | 13q33.1 | XPG (ERCC5) | C | G | 0.36 (1KG) | OR (GC+CC/GG)=4.9                     | 2.0-12.9                 | <0.001         |
| Ta+T1                    | 2018 | Ahmed et al. [6]    | NMIBC | UC | Pakistani         | 65 (NMIBC) / 99 (Controls)                                         | rs2304277            | 3p25.3  | OGG1        | G | A | 0.65 (1KG) | OR (GG/AA)=4.03                       | 1.87-8.67                | <0.05          |
| Ta+T1                    | 2018 | Ahmed et al. [6]    | NMIBC | UC | Pakistani         | 248 (NMIBC) / 400 (Controls) (Allele count instead of individuals) | rs2304277            | 3p25.3  | OGG1        | G | A | 0.65 (1KG) | OR (G/A)=1.78                         | 1.25-2.53                | <0.05          |
| Ta+T1                    | 2018 | Ahmed et al. [6]    | NMIBC | UC | Pakistani         | 107 (NMIBC) / 184 (Controls)                                       | rs2228001            | 3p25.1  | XPC         | C | A | 0.32 (1KG) | OR (AC/AA)=2.14                       | 1.20-3.81                | <0.05          |
| Ta+T1                    | 2018 | Ahmed et al. [6]    | NMIBC | UC | Pakistani         | 92 (NMIBC) / 167 (Controls)                                        | rs2228001            | 3p25.1  | XPC         | C | A | 0.32 (1KG) | OR (CC/AA)=2.52                       | 1.17-5.41                | <0.05          |
| Ta+T1                    | 2018 | Ahmed et al. [6]    | NMIBC | UC | Pakistani         | 248 (NMIBC) / 400 (Controls) (Allele count instead of individuals) | rs2228001            | 3p25.1  | XPC         | C | A | 0.32 (1KG) | OR (C/A)=1.72                         | 1.21-2.43                | <0.05          |
| Ta+T1                    | 2018 | Ahmed et al. [6]    | NMIBC | UC | Pakistani         | 248 (NMIBC) / 400 (Controls) (Allele count instead of individuals) | rs1052133            | 3p25.3  | OGG1        | G | C | 0.30 (1KG) | OR (G/C)=1.57                         | 1.03-2.37                | <0.05          |

**Associations for stages of T2+:**

**Associations reducing the risk of stages of T2+:**

|             |      |                         |     |              |                  |                                                |                                   |          |         |    |        |                                                   |                                     |                        |                   |
|-------------|------|-------------------------|-----|--------------|------------------|------------------------------------------------|-----------------------------------|----------|---------|----|--------|---------------------------------------------------|-------------------------------------|------------------------|-------------------|
| T2+         | 2009 | Ahirwar et al. [17]     | UBC | UC           | Indian           | 82 (T2+) / 132 (Ta+T1)                         | 857C>T (rs1799724)                | 6p21.33  | TNFA    | T  | C      | 0.09 (1KG)                                        | OR (CT/CC)=0.52                     | 0.27-0.99              | 0.049             |
| T2+         | 2009 | Guey et al. [18]        | UBC | UC           | European (Spain) | 246 (Only reported overall)                    | rs6463524 (merged into rs1805319) | 7p22.1   | PMS2    | G? | A/C/T? | G=0.17 (1KG)                                      | OR (G?/A?C?T?)=0.56                 | 0.41-0.77              | 0.0002            |
| T2+         | 2009 | Guey et al. [18]        | UBC | UC           | European (Spain) | 246 (Only reported overall)                    | rs3213427                         | 12p13.31 | CD4     | C? | T?     | C=0.26 (1KG)                                      | OR (C?/T?)=0.71                     | 0.57-0.88              | 0.001             |
| T2+         | 2009 | Guey et al. [18]        | UBC | UC           | European (Spain) | 246 (Only reported overall)                    | rs828702                          | 2q35     | XRCC5   | G? | A?     | G=0.45 (1KG)                                      | OR (G?/A?)=0.80                     | 0.65-0.99              | 0.037             |
| T2+         | 2010 | Gangwar et al. [19]     | UBC | UC           | Indian           | 34 (T2+) / 25 (TaG1)                           | T309G (rs2279744)                 | 12q15    | MDM2    | G  | T      | 0.37 (1KG)                                        | OR (GG/TT)=0.30                     | 0.09-0.99              | 0.049             |
| T2+ / Ta+T1 | 2015 | Deng et al. [20]        | UBC | Not reported | Chinese          | 84 (Invasive) / 75 (Superficial)               | rs2910164                         | 5q33.3   | MIR146A | G  | C      | 0.39 (all UBC) / 0.32 (TOPMED)                    | OR (GG / CG+CC)=0.20                | 0.05-0.72              | 0.012             |
| T2+ / Ta+T1 | 2011 | Safarinejad et al. [21] | UBC | UC           | Iranian          | 56 (T2+) / 84 (Ta+T1)<br>37 (T2+) / 40 (Ta+T1) | rs2854744                         | 7p12.3   | IGFBP3  | A  | C      | 0.39 (UBC) / 0.49 (Healthy controls) / 0.47 (1KG) | OR (AC/CC)=0.32<br>OR (AA/CC)= 0.17 | 0.24-0.52<br>0.11-0.31 | 0.0001<br>0.00001 |
| T2+ / Ta+T1 | 2011 | Lin et al. [22]         | UBC | UC           | Taiwanese        | 34 (T2+) / 58 (Ta+T1)                          | CCND1 G870A (rs9344)              | 11q13.3  | CCND1   | G  | A      | 0.59 (1KG)                                        | OR (AG/AA)=0.29                     | 0.12-0.70              | 0.009             |
| T2+ / Ta+T1 | 2013 | Safarinejad et al. [23] | UBC | UC           | Iranian          | 59 (T2+) / 107 (Ta+T1)                         | rs1695                            | 11q13.2  | GSTP1   | G  | A      | 0.35 (1KG)                                        | OR (AG+GG/AA)=0.72                  | 0.51-0.87              | 0.002             |
| T2+ / TaG1  | 2009 | Gangwar et al. [24]     | UBC | UC           | Indian           | 59 (T2+) / 34 (TaG1)                           | 1263A>G (rs4645978)               | 1p36.21  | CASP9   | G  | A      | 0.42 (1KG)                                        | OR (AG/AA)=0.28                     | 0.10-0.76              | 0.013             |

|                                                            |      |                        |                |              |                   |                                   |                           |         |         |    |        |                                             |                     |           |        |
|------------------------------------------------------------|------|------------------------|----------------|--------------|-------------------|-----------------------------------|---------------------------|---------|---------|----|--------|---------------------------------------------|---------------------|-----------|--------|
| T2+ / TaG1                                                 | 2013 | Jaiswal et al. [25]    | UBC            | UC           | Indian            | 50 (MIBC) / 36 (NMIBC)            | IL18(-137) G/C (rs187238) | 11q23.1 | IL18    | C  | G      | 0.79 (1KG)                                  | OR (GC/GG)=0.36     | 0.15-0.89 | 0.027  |
| T2+ / Healthy controls                                     | 2017 | Ali et al. [12]        | UBC            | UC           | Pakistani         | 76 (T2+) / 200 (Healthy controls) | rs1801282                 | 3p25.2  | PPARG   | G  | C      | 0.16 (Cases) / 0.12 (Controls) / 0.07 (1KG) | OR (GG/CC)=5.4      | 1.2-24    | <0.05  |
| <b>Associations increasing the risk for stages of T2+:</b> |      |                        |                |              |                   |                                   |                           |         |         |    |        |                                             |                     |           |        |
| T1+T2+ / Ta                                                | 2007 | Sanyal et al. [26]     | UBC            | Not reported | European (Sweden) | 106 (T1+T2+) / 146 (Ta)           | G39E (rs1042821)          | 2p16.3  | MSH6    | A  | G      | 0.20 (1KG)                                  | RR (AG+AA/GG)=1.9   | 1.1-3.2   | 0.03   |
| T1+T2+ / Ta                                                | 2007 | Sanyal et al. [27]     | UBC            | Not reported | European (Sweden) | 103 (T1+T2+) / 145 (Ta)           | P187S (rs1800566)         | 16q22.1 | NQO1    | T  | C      | 0.29 (1KG)                                  | RR (CT+TT/CC)=1.8   | 1.0-3.1   | 0.04   |
| T2+                                                        | 2007 | Sanyal et al. [27]     | UBC            | Not reported | European (Sweden) | 40 (AG+GG) / 25 (AA)              | I105V (rs1695)            | 11q13.2 | GSTP1   | G  | A      | 0.35 (1KG)                                  | RR (AG+GG/AA)=2.7   | 1.3-5.6   | 0.008  |
| T2+                                                        | 2009 | Guey et al. [18]       | UBC            | UC           | European (Spain)  | 246 (Only reported overall)       | rs11738738                | 5q31.2  | MATR3   | A? | C/T    | A=0.39 (1KG)                                | OR (A?/C?T?)=1.26   | 1.02-1.56 | 0.032  |
| T2+                                                        | 2009 | Guey et al. [18]       | UBC            | UC           | European (Spain)  | 246 (Only reported overall)       | rs2274700                 | 1q31.3  | CFH     | A? | C/G/T? | A=0.48 (1KG)                                | OR (A?/C?G?T?)=1.24 | 1.00-1.52 | 0.046  |
| T2+                                                        | 2009 | Guey et al. [18]       | UBC            | UC           | European (Spain)  | 246 (Only reported overall)       | rs6596471                 | 5q31.2  | SLC23A1 | A? | C/G/T? | A=0.48 (1KG)                                | OR (A?/C?G?T?)=1.29 | 1.05-1.60 | 0.019  |
| T2+                                                        | 2009 | Guey et al. [18]       | UBC            | UC           | European (Spain)  | 246 (Only reported overall)       | rs10063949                | 5q31.2  | SLC23A1 | T? | C?     | T=0.42 (1KG)                                | OR (T?/C?)=1.25     | 1.01-1.54 | 0.039  |
| T2+                                                        | 2009 | Guey et al. [18]       | UBC            | UC           | European (Spain)  | 246 (Only reported overall)       | rs4315920                 | 5q31.2  | DNAJC18 | A? | G?     | A=0.46 (1KG)                                | OR (A?/G?)=1.31     | 1.06-1.62 | 0.013  |
| T2+                                                        | 2010 | Wang et al. [28]       | UBC            | UC           | Chinese           | 115 (CT/TT) / 86 (CC)             | rs2294008                 | 8q24.3  | PSCA    | T  | C      | 0.60 (1KG)                                  | OR (CT+TT/CC)=1.65  | 1.18-2.31 | 0.003  |
| T2+                                                        | 2010 | Safarinejad et al. [2] | UBC (men only) | UC           | Iranian           | 56 (T2+)                          | rs2274976                 | 1p36.22 | MTHFR   | A  | G      | 0.07 (1KG)                                  | OR (A/G)=3.55       | 2.42-5.71 | 0.001  |
| T2+                                                        | 2010 | Safarinejad et al. [2] | UBC (men only) | UC           | Iranian           | 56 (T2+)                          | rs1801133                 | 1p36.22 | MTHFR   | T  | C      | 0.25 (1KG)                                  | OR (T/C)=3.52       | 2.25-5.37 | 0.001  |
| T2+                                                        | 2010 | Safarinejad et al. [2] | UBC (men only) | UC           | Iranian           | 56 (T2+)                          | rs1801131                 | 1p36.22 | MTHFR   | C  | A      | 0.25 (1KG)                                  | OR (C/A)=3.62       | 2.35-5.67 | 0.001  |
| T2+                                                        | 2013 | Pandith et al. [15]    | UBC            | UC           | Indian            | 25 (TC+CC) / 40 (TT)              | rs12628                   | 11p15.5 | HRAS    | C  | T      | 0.30 (1KG)                                  | OR (TC+CC/TT)=3.3   | 1.71-6.30 | <0.001 |

|                        |      |                         |      |              |                               |                                   |                          |          |                  |   |   |                                             |                    |            |        |
|------------------------|------|-------------------------|------|--------------|-------------------------------|-----------------------------------|--------------------------|----------|------------------|---|---|---------------------------------------------|--------------------|------------|--------|
| T2+                    | 2012 | Zhou et al. [29]        | UBC  | UC           | Chinese                       | 115 (AG+AA) / 29 (GG)             | rs2275913                | 6p12.2   | IL17             | A | G | 0.29 (1KG)                                  | OR (AG+AA/GG)=1.79 | 1.04-3.03  | 0.032  |
| T2+                    | 2013 | Chu et al. [30]         | MIBC | UC           | Chinese                       | 81 (CC) / 238 (CT+TT)             | 3'UTR 774T>C (rs884225)  | 7p11.2   | EGFR             | C | T | 0.19 (1KG)                                  | OR (CC/CT+TT)=1.40 | 1.05-1.89  | <0.05  |
| T2+                    | 2016 | Hua et al. [31]         | UBC  | UC           | Chinese                       | 56 (AA) / 3015 (GG+GA)            | rs217727                 | 11p15.5  | H19 (lncRNA)     | A | G | 0.36 / 0.20 (1KG)                           | OR (AA/GG+GA)=1.48 | 1.06-2.06  | 0.022  |
| T2+ / Healthy controls | 2002 | Chen et al. [8]         | UBC  | UC           | Taiwanese                     | 20 (T2+) / 119 (Healthy controls) | Ser31Arg (rs1801270)     | 6p21.2   | P21 (CDKN1A)     | A | C | 0.74 (Cases) / 0.57 (Controls) / 0.26 (1KG) | OR (A/C)= 1.55     | 0.77-3.12  | 0.01   |
| T2+ / Healthy controls | 2009 | Gangwar et al. [32]     | UBC  | UC           | Indian                        | 43 (T2+) / 134 (Healthy controls) | rs7003908                | 8q11.21  | XRCC7 (PRKDC)    | G | T | 0.33 (1KG)                                  | OR (GG/TT)=6.80    | 2.30-15.75 | <0.001 |
| T2+ / Healthy controls | 2012 | Lin et al. [33]         | MIBC | Not reported | Taiwanese                     | 42 (CC) / 151 (CT+TT)             | p53 codon 72 (rs1042522) | 17p13.1  | TP53             | C | G | 0.63 (Cases) / 0.67 (Controls) / 0.54 (1KG) | OR (CC/CT+TT)=3.36 | 1.58-7.15  | 0.002  |
| T2+ / Ta+T1            | 2005 | Leibovici et al. [34]   | UBC  | Not reported | Caucasian (White)             | 203 (T2+) / 238 (Ta+T1)           | rs1800629                | 6p21.33  | TNFA             | A | G | 0.09 (1KG)                                  | OR (AG+AA/GG)=1.91 | 1.27-2.89  | <0.05  |
| T2+ / Ta+T1            | 2005 | Leibovici et al. [34]   | UBC  | Not reported | Caucasian (White)             | 187 (T2+) / 232 (Ta+T1)           | Pro12Ala (rs1801282)     | 3p25.2   | PPARG            | G | C | 0.07 (1KG)                                  | OR (CG+GG/CC)=1.61 | 1.03-2.53  | <0.05  |
| T2+ / Ta+T1            | 2007 | Kader et al. [35]       | UBC  | Not reported | Caucasian (Northern American) | 241 (MIBC) / 314 (NMIBC)          | A82G (rs2276109)         | 11q22.2  | MMP12            | G | A | 0.06 (1KG)                                  | OR (AG+GG/AA)=1.50 | 1.00-2.28  | <0.05  |
| T2+ / Ta+T1            | 2012 | Kucukgergin et al. [36] | UBC  | UC           | Turkish                       | 20 (T2+) / 71 (Ta+T1)             | Pro198Leu (rs1050450)    | 3p21.31  | GPX1             | T | C | 0.22 (1KG)                                  | OR (TT/CC)=4.13    | 1.98-8.58  | <0.001 |
| T2+ / Ta+T1            | 2012 | Guirado et al. [37]     | UBC  | UC           | European (Spain)              | 92 (T2+) / 136 (Ta+T1)            | rs3764147                | 13q14.11 | C13ORF31 (LACC1) | T | C | 0.7 (1KG)                                   | OR (TT/CT)=1.87    | 1.05-3.32  | 0.033  |

|             |      |                         |                     |              |                  |                                                 |                       |               |               |   |   |                             |                                       |                        |                |
|-------------|------|-------------------------|---------------------|--------------|------------------|-------------------------------------------------|-----------------------|---------------|---------------|---|---|-----------------------------|---------------------------------------|------------------------|----------------|
| T2+ / Ta+T1 | 2012 | Guirado et al. [37]     | UBC                 | UC           | European (Spain) | 98 (T2+) / 148 (Ta+T1)                          | rs4129009             | 4p14          | TLR10         | T | C | 0.85 (1KG)                  | OR (TT/CT+CC)=1.75                    | 1.04-2.94              | 0.033          |
| T2+ / Ta+T1 | 2012 | Kucukgergin et al. [38] | UBC                 | UC           | Turkish          | 27 (T2+) / 105 (Ta+T1)                          | rs2228014             | 2q2           | CXCR4         | T | C | 0.06 (1KG)                  | OR (CT+TT/CC)=1.61                    | 1.03-2.52              | 0.035          |
| T2+ / Ta+T1 | 2012 | Kucukgergin et al. [38] | UBC                 | UC           | Turkish          | 20 (T2+) / 85 (Ta+T1)<br>27 (T2+) / 115 (Ta+T1) | CCR2 V64I (rs1799864) | 3p21.31       | CCR2          | A | G | 0.15 (1KG)                  | OR (AA/GG)=6.56<br>OR (AG+AA/GG)=1.66 | 2.18-19.7<br>1.06-2.60 | 0.001<br>0.026 |
| T2+ / Ta+T1 | 2012 | Kucukgergin et al. [38] | UBC                 | UC           | Turkish          | 20 (T2+) / 64 (Ta+T1)                           | rs1801157             | 10q11.21      | SDF1 (CXCL12) | A | G | 0.19 (1KG)                  | OR (AA/GG)=1.93                       | 1.11-3.38              | 0.02           |
| T2+ / Ta+T1 | 2013 | Wen et al. [39]         | UBC                 | UC           | Chinese          | 36 (MIBC) / 94 (NMIBC)                          | rs2228001             | 3p25.1        | XPC           | C | A | 0.32 (1KG)                  | Chi-square = 18.89                    | N/A                    | <0.001         |
| T2+ / Ta+T1 | 2014 | Zhang et al. [40]       | UBC                 | UC           | Chinese          | 151 (MIBC) / 174 (NMIBC)                        | rs61330082            | 7q22.3        | NAMPT         | C | T | 0.73 (1KG)                  | OR (CT/CC+TT)=1.70                    | 1.01-2.87              | <0.05          |
| T2+ / Ta+T1 | 2014 | Zhou et al. [41]        | UBC (excluding Tis) | UC           | Chinese          | 156 (T2+) / 176 (Ta+T1)                         | rs3756712             | 5p15.33       | PDCD6         | G | T | 0.40 (1KG)                  | OR (GG/GT+TT)=3.33                    | 1.23-10.00             | <0.05          |
| T2+ / Ta+T1 | 2015 | Weng et al. [42]        | UBC                 | UC           | Taiwanese        | 108 (T2+) / 167 (Ta+T1)                         | rs187115              | 11p13         | CD44          | G | A | 0.20 (all UBC) / 0.35 (1KG) | OR (AA/AG+GG)=1.69                    | 1.020-2.793            | 0.041          |
| T2+ / TaG1  | 2008 | Mittal et al. [43]      | NMIBC               | UC           | Indian           | 32 (T2+) / 25 (TaG1)                            | Codon 194 (rs1799782) | 19q13.2       | XRCC1         | T | C | 0.12 (1KG)                  | OR (CT+TT/CC)=11.00                   | 1.29-92.30             | 0.03           |
| T2+ / TaG1  | 2010 | Gangwar et al. [44]     | UBC                 | UC           | Indian           | 63 (T2+) / 35 (TaG1)                            | Lys939Gln (rs2228001) | 3p25.1        | XPC           | C | A | 0.32 (1KG)                  | OR (AC+CC/AA)=2.52                    | 1.03-6.14              | 0.041          |
| T2+ / TaG1  | 2011 | Gangwar et al. [45]     | MIBC                | UC           | Indian           | 63 (T2+) / 33 (TaG1)                            | rs20417               | 1q31.1        | COX2 (PTGS2)  | C | G | 0.80 (1KG)                  | OR (GC/GG)=2.73                       | 1.08-6.88              | 0.033          |
| T2+/Ta, T1  | 2015 | Zhou et al. [46]        | UBC                 | UC           | Chinese          | 156 (MIBC) / 176 (NMIBC)                        | rs17855750            | 16p12.1-p11.2 | IL27          | G | T | 0.07 (1KG)                  | OR (TG+GG/TT)=2.04                    | 1.02-4.17              | 0.042          |
| T2+ / Ta+T1 | 2010 | Pandith et al. [47]     | UBC                 | UC + Other   | Indian           | 59 (T2+) / 49 (T1+T1)                           | Arg72Pro (rs1042522)  | 17p13.1       | TP53          | C | G | 0.54 (1KG)                  | OR (CC+CG/GG)=4.2                     | 1.5-11.3               | 0.004          |
| T2+ / Ta+G1 | 2012 | Mittal et al. [48]      | UBC                 | Not reported | Indian           | 29 (T2+) / 16 (Ta+G1)                           | Exon 10 (rs1799793)   | 19q13.32      | XPD (ERCC2)   | A | G | 0.19 (1KG)                  | OR (AA/GG)=4.53                       | 1.05-19.4              | 0.042          |

|     |      |                  |      |    |           |                                                                   |           |        |      |   |   |            |                 |           |       |
|-----|------|------------------|------|----|-----------|-------------------------------------------------------------------|-----------|--------|------|---|---|------------|-----------------|-----------|-------|
| T2+ | 2018 | Ahmed et al. [6] | MIBC | UC | Pakistani | 50 (MIBC) / 99 (Controls)                                         | rs2304277 | 3p25.3 | OGG1 | G | A | 0.65 (1KG) | OR (GG/AA)=3.06 | 1.31-7.13 | <0.05 |
| T2+ | 2018 | Ahmed et al. [6] | MIBC | UC | Pakistani | 65 (MIBC) / 184 (Controls)                                        | rs2228001 | 3p25.1 | XPC  | C | A | 0.32 (1KG) | OR (AC/AA)=2.95 | 1.51-5.75 | <0.05 |
| T2+ | 2018 | Ahmed et al. [6] | MIBC | UC | Pakistani | 52 (MIBC) / 167 (Controls)                                        | rs2228001 | 3p25.1 | XPC  | C | A | 0.32 (1KG) | OR (CC/AA)=3.18 | 1.32-7.66 | <0.05 |
| T2+ | 2018 | Ahmed et al. [6] | MIBC | UC | Pakistani | 152 (MIBC) / 400 (Controls) (Allele count instead of individuals) | rs2228001 | 3p25.1 | XPC  | C | A | 0.32 (1KG) | OR (C/A)=2.02   | 1.36-3.01 | <0.05 |
| T2+ | 2018 | Ahmed et al. [6] | MIBC | UC | Pakistani | 57 (MIBC) / 136 (Controls)                                        | rs1052133 | 3p25.3 | OGG1 | G | C | 0.30 (1KG) | OR (GG/CC)=5.95 | 1.37-25.7 | <0.05 |

CI-confidence interval; EA-effect allele; EAF-effect allele frequency; MIBC-muscle-invasive bladder cancer; NMIBC-non-muscle-invasive bladder cancer; OR-odds ratio; RA-reference allele; SNP-single nucleotide polymorphism; UBC-urinary bladder cancer; UC-urothelial carcinoma; 1KG-1000 Genomes Project.

61

62

#### REFERENCES

63

1. Kelsey KT, Park S, Nelson HH, Karagas MR. A population-based case-control study of the XRCC1 Arg399Gln polymorphism and susceptibility to bladder cancer. *Cancer epidemiology, biomarkers & prevention : a publication of the American Association for Cancer Research*, cosponsored by the American Society of Preventive Oncology. 2004;13(8):1337-41.

64

2. Safarinejad MR, Shafiei N, Safarinejad S. Genetic susceptibility of methylenetetrahydrofolate reductase (MTHFR) gene C677T, A1298C, and G1793A polymorphisms with risk for bladder transitional cell carcinoma in men. *Medical oncology (Northwood, London, England)*. 2011;28 Suppl 1:S398-412.

65

3. Sobti RC, Kaur S, Sharma VL, Singh SK, Hosseini SA, Kler R. Susceptibility of XPD and RAD51 genetic variants to carcinoma of urinary bladder in North Indian population. *DNA and cell biology*. 2012;31(2):199-210.

66

4. Verhaegh GW, Verkleij L, Vermeulen SH, den Heijer M, Witjes JA, Kiemeny LA. Polymorphisms in the H19 gene and the risk of bladder cancer. *European urology*. 2008;54(5):1118-26.

67

5. Zhao T, Wu X, Liu J. Association between interleukin-22 genetic polymorphisms and bladder cancer risk. *Clinics (Sao Paulo, Brazil)*. 2015;70(10):686-90.

68

6. Ahmed T, Nawaz S, Noreen R, Bangash KS, Rauf A, Younis M, Anwar K, Khawaja MA, Azam M, Qureshi AA, Akhter S, Kiemeny LA, Qamar R, Ali SHB. A 3' untranslated region polymorphism rs2304277 in the DNA repair pathway gene OGG1 is a novel risk modulator for urothelial bladder carcinoma. *Annals of human genetics*. 2018;82(2):74-87.

69

7. Yuan L, Gu X, Shao J, Wang M, Wang M, Zhu Q, Zhang Z. Cyclin D1 G870A polymorphism is associated with risk and clinicopathologic characteristics of bladder cancer. *DNA and cell biology*. 2010;29(10):611-7.

70

71

72

73

74

75

76

77

78

79

- 80 8. Chen WC, Wu HC, Hsu CD, Chen HY, Tsai FJ. p21 gene codon 31 polymorphism is associated with bladder cancer. *Urologic oncology*.  
81 2002;7(2):63-6.
- 82 9. Gangwar R, Ahirwar D, Mandhani A, Mittal RD. Influence of XPD and APE1 DNA repair gene polymorphism on bladder cancer  
83 susceptibility in north India. *Urology*. 2009;73(3):675-80.
- 84 10. Wen H, Ding Q, Fang ZJ, Xia GW, Fang J. Population study of genetic polymorphisms and superficial bladder cancer risk in Han-Chinese  
85 smokers in Shanghai. *International urology and nephrology*. 2009;41(4):855-64.
- 86 11. Ichimura Y, Habuchi T, Tsuchiya N, Wang L, Oyama C, Sato K, Nishiyama H, Ogawa O, Kato T. Increased risk of bladder cancer associated  
87 with a glutathione peroxidase 1 codon 198 variant. *The Journal of urology*. 2004;172(2):728-32.
- 88 12. Ali SHB, Bangash KS, Rauf A, Younis M, Anwar K, Khurram R, Khawaja MA, Azam M, Qureshi AA, Akhter S, Kiemenev LA, Qamar R.  
89 Identification of novel potential genetic predictors of urothelial bladder carcinoma susceptibility in Pakistani population. *Familial cancer*.  
90 2017;16(4):577-94.
- 91 13. Lima L, Silva J, Amaro T, Morais A, Lopes C, Medeiros R, Videira PA, Santos L. IL-4 and TNF-alpha polymorphisms are associated with risk  
92 of multiple superficial tumors or carcinoma in situ development. *Urologia internationalis*. 2011;87(4):457-63.
- 93 14. Ito M, Habuchi T, Watanabe J, Higashi S, Nishiyama H, Wang L, Tsuchiya N, Kamoto T, Ogawa O. Polymorphism within the cyclin D1  
94 gene is associated with an increased risk of carcinoma in situ in patients with superficial bladder cancer. *Urology*. 2004;64(1):74-8.
- 95 15. Pandith AA, Shah ZA, Khan NP, Baba KM, Wani MS, Siddiqi MA. HRAS T81C polymorphism modulates risk of urinary bladder cancer and  
96 predicts advanced tumors in ethnic Kashmiri population. *Urologic oncology*. 2013;31(4):487-92.
- 97 16. Sakano S, Kumar R, Larsson P, Onelov E, Adolfsson J, Steineck G, Hemminki K. A single-nucleotide polymorphism in the XPG gene, and  
98 tumour stage, grade, and clinical course in patients with nonmuscle-invasive neoplasms of the urinary bladder. *BJU international*.  
99 2006;97(4):847-51.
- 100 17. Ahirwar DK, Mandhani A, Dharaskar A, Kesarwani P, Mittal RD. Association of tumour necrosis factor-alpha gene (T-1031C, C-863A, and  
101 C-857T) polymorphisms with bladder cancer susceptibility and outcome after bacille Calmette-Guerin immunotherapy. *BJU international*.  
102 2009;104(6):867-73.
- 103 18. Guey LT, Garcia-Closas M, Murta-Nascimento C, Lloreta J, Palencia L, Kogevinas M, Rothman N, Vellalta G, Calle ML, Marenne G, Tardon  
104 A, Carrato A, Garcia-Closas R, Serra C, Silverman DT, Chanock S, Real FX, Malats N. Genetic susceptibility to distinct bladder cancer  
105 subphenotypes. *European urology*. 2010;57(2):283-92.
- 106 19. Gangwar R, Mittal RD. Association of selected variants in genes involved in cell cycle and apoptosis with bladder cancer risk in North  
107 Indian population. *DNA and cell biology*. 2010;29(7):349-56.
- 108 20. Deng S, Wang W, Li X, Zhang P. Common genetic polymorphisms in pre-microRNAs and risk of bladder cancer. *World journal of surgical*  
109 *oncology*. 2015;13:297.



- 110 21. Safarinejad MR, Shafiei N, Safarinejad SH. The association between bladder cancer and a single nucleotide polymorphism (rs2854744)  
111 in the insulin-like growth factor (IGF)-binding protein-3 (IGFBP-3) gene. *Archives of toxicology*. 2011;85(10):1209-18.
- 112 22. Lin HH, Ke HL, Hsiao KH, Tsai CW, Wu WJ, Bau DT, Chang LL. Potential role of CCND1 G870A genotype as a predictor for urothelial  
113 carcinoma susceptibility and muscle-invasiveness in Taiwan. *The Chinese journal of physiology*. 2011;54(3):196-202.
- 114 23. Safarinejad MR, Safarinejad S, Shafiei N, Safarinejad S. Association of genetic polymorphism of glutathione S-transferase (GSTM1,  
115 GSTT1, GSTP1) with bladder cancer susceptibility. *Urologic oncology*. 2013;31(7):1193-203.
- 116 24. Gangwar R, Mandhani A, Mittal RD. Caspase 9 and caspase 8 gene polymorphisms and susceptibility to bladder cancer in north Indian  
117 population. *Annals of surgical oncology*. 2009;16(7):2028-34.
- 118 25. Jaiswal PK, Singh V, Srivastava P, Mittal RD. Association of IL-12, IL-18 variants and serum IL-18 with bladder cancer susceptibility in  
119 North Indian population. *Gene*. 2013;519(1):128-34.
- 120 26. Sanyal S, De Verdier PJ, Steineck G, Larsson P, Onelov E, Hemminki K, Kumar R. Polymorphisms in XPD, XPC and the risk of death in  
121 patients with urinary bladder neoplasms. *Acta oncologica (Stockholm, Sweden)*. 2007;46(1):31-41.
- 122 27. Sanyal S, Ryk C, De Verdier PJ, Steineck G, Larsson P, Onelov E, Hemminki K, Kumar R. Polymorphisms in NQO1 and the clinical course of  
123 urinary bladder neoplasms. *Scandinavian journal of urology and nephrology*. 2007;41(3):182-90.
- 124 28. Wang S, Tang J, Wang M, Yuan L, Zhang Z. Genetic variation in PSCA and bladder cancer susceptibility in a Chinese population.  
125 *Carcinogenesis*. 2010;31(4):621-4.
- 126 29. Zhou B, Zhang P, Wang Y, Shi S, Zhang K, Liao H, Zhang L. Interleukin-17 gene polymorphisms are associated with bladder cancer in a  
127 Chinese Han population. *Molecular carcinogenesis*. 2013;52(11):871-8.
- 128 30. Chu H, Wang M, Jin H, Lv Q, Wu D, Tong N, Ma L, Shi D, Zhong D, Fu G, Yuan L, Qin C, Yin C, Zhang Z. EGFR 3'UTR 774T>C polymorphism  
129 contributes to bladder cancer risk. *Mutagenesis*. 2013;28(1):49-55.
- 130 31. Hua Q, Lv X, Gu X, Chen Y, Chu H, Du M, Gong W, Wang M, Zhang Z. Genetic variants in lncRNA H19 are associated with the risk of  
131 bladder cancer in a Chinese population. *Mutagenesis*. 2016;31(5):531-8.
- 132 32. Gangwar R, Ahirwar D, Mandhani A, Mittal RD. Do DNA repair genes OGG1, XRCC3 and XRCC7 have an impact on susceptibility to  
133 bladder cancer in the North Indian population? *Mutation research*. 2009;680(1-2):56-63.
- 134 33. Lin HY, Huang CH, Yu TJ, Wu WJ, Yang MC, Lung FW. p53 codon 72 polymorphism as a progression index for bladder cancer. *Oncology*  
135 *reports*. 2012;27(4):1193-9.
- 136 34. Leibovici D, Grossman HB, Dinney CP, Millikan RE, Lerner S, Wang Y, Gu J, Dong Q, Wu X. Polymorphisms in inflammation genes and  
137 bladder cancer: from initiation to recurrence, progression, and survival. *Journal of clinical oncology : official journal of the American Society of*  
138 *Clinical Oncology*. 2005;23(24):5746-56.

- 139 35. Kader AK, Liu J, Shao L, Dinney CP, Lin J, Wang Y, Gu J, Grossman HB, Wu X. Matrix metalloproteinase polymorphisms are associated  
140 with bladder cancer invasiveness. *Clinical cancer research : an official journal of the American Association for Cancer Research*.  
141 2007;13(9):2614-20.
- 142 36. Kucukgergin C, Sanli O, Amasyali AS, Tefik T, Seckin S. Genetic variants of MnSOD and GPX1 and susceptibility to bladder cancer in a  
143 Turkish population. *Medical oncology (Northwood, London, England)*. 2012;29(3):1928-34.
- 144 37. Guirado M, Gil H, Saenz-Lopez P, Reinboth J, Garrido F, Cozar JM, Ruiz-Cabello F, Carretero R. Association between C13ORF31, NOD2,  
145 RIPK2 and TLR10 polymorphisms and urothelial bladder cancer. *Human immunology*. 2012;73(6):668-72.
- 146 38. Kucukgergin C, Isman FK, Dasedemir S, Cakmakoglu B, Sanli O, Gokkusu C, Seckin S. The role of chemokine and chemokine receptor gene  
147 variants on the susceptibility and clinicopathological characteristics of bladder cancer. *Gene*. 2012;511(1):7-11.
- 148 39. Wen H, Feng CC, Fang ZJ, Xia GW, Jiang HW, Xu G, Huang XD, Ding Q. Study on bladder cancer susceptibility and genetic polymorphisms  
149 of XPC, XPG, and CYP in smokers and non-smokers. *Actas urologicas espanolas*. 2013;37(5):259-65.
- 150 40. Zhang K, Zhou B, Zhang P, Zhang Z, Chen P, Pu Y, Song Y, Zhang L. Genetic variants in NAMPT predict bladder cancer risk and prognosis  
151 in individuals from southwest Chinese Han group. *Tumour biology : the journal of the International Society for Oncodevelopmental Biology and*  
152 *Medicine*. 2014;35(5):4031-40.
- 153 41. Zhou B, Zhang P, Tang T, Zhang K, Wang Y, Song Y, Liao H, Zhang L. Prognostic value of PDCD6 polymorphisms and the susceptibility to  
154 bladder cancer. *Tumour biology : the journal of the International Society for Oncodevelopmental Biology and Medicine*. 2014;35(8):7547-54.
- 155 42. Weng WC, Huang YH, Yang SF, Wang SS, Kuo WH, Hsueh CW, Huang CH, Chou YE. Effect of CD44 gene polymorphisms on risk of  
156 transitional cell carcinoma of the urinary bladder in Taiwan. *Tumour biology : the journal of the International Society for Oncodevelopmental*  
157 *Biology and Medicine*. 2016;37(5):6971-7.
- 158 43. Mittal RD, Singh R, Manchanda PK, Ahirwar D, Gangwar R, Kesarwani P, Mandhani A. XRCC1 codon 399 mutant allele: a risk factor for  
159 recurrence of urothelial bladder carcinoma in patients on BCG immunotherapy. *Cancer biology & therapy*. 2008;7(5):645-50.
- 160 44. Gangwar R, Mandhani A, Mittal RD. XPC gene variants: a risk factor for recurrence of urothelial bladder carcinoma in patients on BCG  
161 immunotherapy. *Journal of cancer research and clinical oncology*. 2010;136(5):779-86.
- 162 45. Gangwar R, Mandhani A, Mittal RD. Functional polymorphisms of cyclooxygenase-2 (COX-2) gene and risk for urinary bladder cancer in  
163 North India. *Surgery*. 2011;149(1):126-34.
- 164 46. Zhou B, Zhang P, Tang T, Liao H, Zhang K, Pu Y, Chen P, Song Y, Zhang L. Polymorphisms and plasma levels of IL-27: impact on genetic  
165 susceptibility and clinical outcome of bladder cancer. *BMC cancer*. 2015;15:433.
- 166 47. Pandith AA, Shah ZA, Khan NP, Rasool R, Afroze D, Yousuf A, Wani S, Siddiqi M. Role of TP53 Arg72Pro polymorphism in urinary bladder  
167 cancer predisposition and predictive impact of proline related genotype in advanced tumors in an ethnic Kashmiri population. *Cancer genetics*  
168 *and cytogenetics*. 2010;203(2):263-8.

169 48. Mittal RD, Mandal RK. Genetic variation in nucleotide excision repair pathway genes influence prostate and bladder cancer  
170 susceptibility in North Indian population. Indian journal of human genetics. 2012;18(1):47-55.  
171

172 Supplementary Table 5. Summary associations for previously reported SNPs on tumor grade at the time of diagnosis for urinary bladder  
 173 cancer.

| Outcome                                                                          | Year | Study                  | Patient subgroup | Cancer subtype | Ethnic background | Sample size (Cases/Controls)        | SNP                       | Locus   | Gene                | EA | RA | EAF                                         | Effect Size         | 95% CI      | p value  |
|----------------------------------------------------------------------------------|------|------------------------|------------------|----------------|-------------------|-------------------------------------|---------------------------|---------|---------------------|----|----|---------------------------------------------|---------------------|-------------|----------|
| <b>Associations for G1 and G2 (or combinations of these):</b>                    |      |                        |                  |                |                   |                                     |                           |         |                     |    |    |                                             |                     |             |          |
| <b>Associations reducing the risk of G1 and G2 (or combinations of these):</b>   |      |                        |                  |                |                   |                                     |                           |         |                     |    |    |                                             |                     |             |          |
| G1+G2                                                                            | 2011 | Safarinejad et al. [1] | UBC (men only)   | UC             | Iranian           | 115 (G1+G2)                         | rs1801133                 | 1p36.22 | MTHFR               | T  | C  | 0.25 (1KG)                                  | OR (T/C)=0.46       | 0.35–0.66   | 0.001    |
| G1+G2                                                                            | 2011 | Safarinejad et al. [1] | UBC (men only)   | UC             | Iranian           | 115 (G1+G2)                         | rs1801131                 | 1p36.22 | MTHFR               | C  | A  | 0.25 (1KG)                                  | OR (C/A)=0.45       | 0.26-0.70   | 0.001    |
| G2                                                                               | 2011 | Sobti et al. [2]       | UBC              | Not reported   | Indian            | 6 (CC) / 92 (GG)                    | RAD51 135 G/C (rs1801320) | 15q15.1 | RAD51               | C  | G  | 0.26 (Cases) / 0.31 (Controls) / 0.14 (1KG) | OR (CC/GG)=0.24     | 0.09–0.62   | 0.0008   |
| Low grade UBC                                                                    | 2015 | Xie et al. [3]         | UBC              | UC             | Chinese           | 211 (Low grade) / 649 (Controls)    | SNP309 T>G (rs2279744)    | 12q15   | MDM2                | G  | T  | 0.37 (1KG)                                  | OR (TG+GG/TT)=0.613 | 0.427-0.881 | 0.008    |
| <b>Associations increasing the risk of G1 and G2 (or combinations of these):</b> |      |                        |                  |                |                   |                                     |                           |         |                     |    |    |                                             |                     |             |          |
| G1                                                                               | 2010 | Yuan et al. [4]        | UBC              | UC             | Chinese           | 164 (G1) / 402 (Healthy controls)   | G870A (rs9344)            | 11q13.3 | CCND1               | A  | G  | 0.41 (1KG)                                  | OR (AG+AA/GG)=1.81  | 1.10-2.97   | 0.019    |
| G1                                                                               | 2010 | Rothman et al. [5]     | UBC              | Not reported   | Multi-ethnic      | 827 (G1) / 5,117 (Healthy controls) | rs798766                  | 4p16.3  | TMEM129 TACC3-FGFR3 | T  | C  | 0.24 (1KG)                                  | OR (T/C)=1.27       | 1.11-1.44   | 3.00E-04 |
| G1                                                                               | 2010 | Rothman et al. [5]     | UBC              | Not reported   | Multi-ethnic      | 826 (G1) / 5,117 (Healthy controls) | rs401681                  | 5p15.33 | CLPTM1L             | C  | T  | 0.59 (1KG)                                  | OR (C/T)=1.22       | 1.09-1.36   | 3.20E-04 |

|                                    |      |                        |                |              |              |                                                                      |                             |         |                            |   |   |                                             |                                    |                        |                |
|------------------------------------|------|------------------------|----------------|--------------|--------------|----------------------------------------------------------------------|-----------------------------|---------|----------------------------|---|---|---------------------------------------------|------------------------------------|------------------------|----------------|
| G1                                 | 2010 | Rothman et al. [5]     | UBC            | Not reported | Multi-ethnic | 825 (G1) / 5,108 (Healthy controls)                                  | rs9642880                   | 8q24.21 | MYC                        | T | G | 0.54 (1KG)                                  | OR (T/G)=1.20                      | 1.08-1.34              | 7.50E-04       |
| G1 / G2+Ta                         | 2010 | Rothman et al. [5]     | UBC            | Not reported | Multi-ethnic | 1,147 (G2) / 2,539 (Healthy controls)                                | rs798766                    | 4p16.3  | TMEM129<br>TACC3-<br>FGFR3 | T | C | 0.24 (1KG)                                  | OR (T/C)=1.28                      | 1.14-1.45              | 4.80E-05       |
| G1 / G2+Ta                         | 2010 | Rothman et al. [5]     | UBC            | Not reported | Multi-ethnic | 1,145 (Low-risk) / 2,532 (Healthy controls)                          | rs9642880                   | 8q24.21 | MYC                        | T | G | 0.54 (1KG)                                  | OR (T/G)=1.25                      | 1.13-1.38              | 8.60E-06       |
| G1 / Healthy controls              | 2008 | Gangwar et al. [6]     | UBC            | UC           | Indian       | 64 (G1) / 232 (Healthy controls)<br>36 (G1) / 146 (Healthy controls) | Asp312Asn (G>A) (rs1799793) | 19q13.3 | ERCC2                      | A | G | 0.19 (1KG)                                  | OR (AG/GG)=2.51<br>OR (AA/GG)=5.21 | 1.39-4.54<br>2.23-12.1 | 0.006<br>0.003 |
| G1+G2                              | 2011 | Safarinejad et al. [1] | UBC (men only) | UC           | Iranian      | 115 (G1+G2)                                                          | rs2274976                   | 1p36.22 | MTHFR                      | A | G | 0.07 (1KG)                                  | OR (G/A)=3.32                      | 2.25-5.46              | 0.001          |
| G2                                 | 2010 | Wang et al. [7]        | UBC            | UC           | Chinese      | 123 (Invasive) / 106 (Superficial)                                   | rs2294008                   | 8q24.3  | PSCA                       | T | C | 0.60 (1KG)                                  | OR (CT+TT/CC)=1.43                 | 1.05-1.96              | 0.024          |
| G2                                 | 2010 | Rothman et al. [5]     | UBC            | Not reported | Multi-ethnic | 856 (G2) / 5,117 (Healthy controls)                                  | rs798766                    | 4p16.3  | TMEM129<br>TACC3-<br>FGFR3 | T | C | 0.24 (1KG)                                  | OR (T/C)=1.21                      | 1.07-1.37              | 2.80E-03       |
| G2                                 | 2010 | Rothman et al. [5]     | UBC            | Not reported | Multi-ethnic | 825 (G2) / 5,108 (Healthy controls)                                  | rs9642880                   | 8q24.21 | MYC                        | T | G | 0.54 (1KG)                                  | OR (T/G)=1.22                      | 1.10-1.36              | 2.10E-04       |
| G2 / Healthy controls              | 2008 | Gangwar et al. [6]     | UBC            | UC           | Indian       | 45 (G2) / 146 (Healthy controls)                                     | Asp312Asn (G>A) (rs1799793) | 19q13.3 | ERCC2                      | A | G | 0.19 (1KG)                                  | OR (AA/GG)=4.67                    | 1.72-12.6              | 0.002          |
| G1+G2+papilloma / Healthy controls | 2017 | Ali et al. [8]         | UBC            | UC           | Pakistani    | 133 (G2+G1) / 200 (Healthy controls)                                 | rs1137101                   | 1p31.3  | LEPR                       | A | G | 0.52 (Cases) / 0.42 (Controls) / 0.42 (1KG) | OR (G/A)=1.4                       | 1.1-2                  | <0.05          |
| G1                                 | 2018 | Ahmed et al. [9]       | UBC            | UC           | Pakistani    | 61 (Low grade UBC) / 99 (Controls)                                   | rs2304277                   | 3p25.3  | OGG1                       | G | A | 0.65 (1KG)                                  | OR (GG/AA) = 3.73                  | 1.72-8.09              | <0.05          |

|               |      |                  |     |              |           |                                                                            |           |          |      |   |   |            |                    |           |       |
|---------------|------|------------------|-----|--------------|-----------|----------------------------------------------------------------------------|-----------|----------|------|---|---|------------|--------------------|-----------|-------|
| G1            | 2018 | Ahmed et al. [9] | UBC | UC           | Pakistani | 234 (Low grade UBC) / 400 (Controls) (Allele count instead of individuals) | rs2304277 | 3p25.3   | OGG1 | G | A | 0.65 (1KG) | OR (G/A)=1.72      | 1.20-2.46 | <0.05 |
| G1            | 2018 | Ahmed et al. [9] | UBC | UC           | Pakistani | 100 (Low grade UBC) / 184 (Controls)                                       | rs2228001 | 3p25.1   | XPC  | C | A | 0.32 (1KG) | OR (AC/AA)=2.18    | 1.21-3.92 | <0.05 |
| G1            | 2018 | Ahmed et al. [9] | UBC | UC           | Pakistani | 87 (Low grade UBC) / 167 (Controls)                                        | rs2228001 | 3p25.1   | XPC  | C | A | 0.32 (1KG) | OR (CC/AA)=2.55    | 1.20-5.44 | <0.05 |
| G1            | 2018 | Ahmed et al. [9] | UBC | UC           | Pakistani | 234 (Low grade UBC) / 400 (Controls) (allele count instead of individuals) | rs2228001 | 3p25.1   | XPC  | C | A | 0.32 (1KG) | OR (C/A)=1.72      | 1.22-2.44 | <0.05 |
| Low grade UBC | 2018 | Li et al. [10]   | UBC | Not reported | Chinese   | 127 (Low grade UBC) / 167 (High grade UBC)                                 | rs4758680 | 12q24.31 | IL31 | A | C | 0.29 (1KG) | OR (CA+AA/CC)=2.34 | 1.25-4.40 | 0.007 |

**Associations for G3 (or other definitions of High grade):**

**Associations reducing the risk of G3 (or High grade):**

|                                      |      |                         |                |              |         |                                              |           |         |                               |   |   |                                                   |                                    |                        |                   |
|--------------------------------------|------|-------------------------|----------------|--------------|---------|----------------------------------------------|-----------|---------|-------------------------------|---|---|---------------------------------------------------|------------------------------------|------------------------|-------------------|
| G3                                   | 2011 | Safarinejad et al. [1]  | UBC (men only) | UC           | Iranian | 43 (G3)                                      | rs2274976 | 1p36.22 | MTHFR                         | A | G | 0.07 (1KG)                                        | OR (G/A)=0.55                      | 0.44-0.72              | 0.014             |
| G3 / G2, G1? (Not explicitly stated) | 2016 | Wu et al. [11]          | UBC            | Not reported | Chinese | 180 (G3) / 153 (G2+G1)                       | rs353293  | 5q32    | MIR143 (microRNA 143) / CARMN | A | G | 10.1 (all UBC cases) / 0.26 (1KG)                 | OR (A/G)=0.54                      | 0.32-0.92              | 0.02              |
| G3 / G1+G2                           | 2011 | Safarinejad et al. [12] | UBC            | UC           | Iranian | 46 (G3) / 94 (G1+G2)<br>31 (G3) / 44 (G1+G2) | rs2854744 | 7p12.3  | IGFBP3                        | A | C | 0.39 (UBC) / 0.49 (Healthy controls) / 0.47 (1KG) | OR (AC/CC)=0.34<br>OR (AA/CC)=0.21 | 0.24-0.68<br>0.12-0.42 | 0.0001<br>0.00001 |

|                                                                           |      |                              |                |              |                   |                                          |                                     |         |                 |   |   |                                             |                      |             |          |
|---------------------------------------------------------------------------|------|------------------------------|----------------|--------------|-------------------|------------------------------------------|-------------------------------------|---------|-----------------|---|---|---------------------------------------------|----------------------|-------------|----------|
| G3 / G1+G2                                                                | 2013 | Safarinejad et al. [13]      | UBC            | UC           | Iranian           | 47 (G3) / 119 (G1+G2))                   | rs1695                              | 11q13.2 | GSTP1           | G | A | 0.35 (1KG)                                  | OR (AG+GG/AA)=0.62   | 0.48-0.79   | 0.002    |
| G3 / Healthy controls                                                     | 2017 | Ali et al. [8]               | UBC            | UC           | Pakistani         | 67 (High grade) / 200 (Healthy controls) | rs2854744                           | 7p12.3  | IGFBP3          | A | C | 0.44 (Cases) / 0.51 (Controls) / 0.53 (1KG) | OR (CA/CC)=0.5       | 0.3-0.98    | <0.05    |
| High grade (G2B+G3) NMIBC / Low grade (G1+G2A) NMIBC (>71 year-old group) | 2006 | Sakano et al. [14]           | NMIBC          | UC           | European (Sweden) | 48 (High grade) / 64 (Low-group)         | Asp1104His (rs17655)                | 13q33.1 | XPG (ERCC5)     | C | G | 0.36 (1KG)                                  | OR (GC+CC/GG)=0.3    | 0.1-0.7     | 0.004    |
| <b>Associations increasing the risk of G3 (or High grade):</b>            |      |                              |                |              |                   |                                          |                                     |         |                 |   |   |                                             |                      |             |          |
| G3                                                                        | 2010 | Rothman et al. [5]           | UBC            | Not reported | Multi-ethnic      | 1.338 (G3) / 6,170 (Healthy controls)    | rs8102137                           | 19q12   | CCNE1           | C | T | 0.16 (1KG)                                  | OR (C/T)=1.23        | 1.13-1.35   | 4.60E-06 |
| G3                                                                        | 2011 | Safarinejad et al. [1]       | UBC (men only) | UC           | Iranian           | 43 (G3)                                  | rs1801133                           | 1p36.22 | MTHFR           | T | C | 0.25 (1KG)                                  | OR (T/C)=3.55        | 2.32-5.41   | 0.001    |
| G3                                                                        | 2011 | Safarinejad et al. [1]       | UBC (men only) | UC           | Iranian           | 43 (G3)                                  | rs1801131                           | 1p36.22 | MTHFR           | C | A | 0.25 (1KG)                                  | OR (C/A)=3.67        | 2.37-5.71   | 0.001    |
| G3                                                                        | 2013 | Pandith et al. [15]          | UBC            | UC           | Indian            | 31 (TC+CC) / 31 (TT)                     | rs12628                             | 11p15.5 | HRAS            | C | T | 0.30 (1KG)                                  | OR (TC+CC/TT)=5.4    | 2.8-10.2    | <0.001   |
| G3                                                                        | 2016 | Hua et al. [16]              | UBC            | UC           | Chinese           | 31 (AA) / 132 (GG+GA)                    | rs217727                            | 11p15.5 | H19 (lncRNA)    | A | G | 0.36 / 0.20 (1KG)                           | OR (AA / GG+GA)=1.89 | 1.23-2.91   | 0.004    |
| G3 / G1+G2                                                                | 2015 | Timirci-Kahraman et al. [17] | UBC            | UC           | Turkish           | 28 (G3) / 52 (G1+G2)                     | rs4871857 (has merged into rs20575) | 8p21.3  | DR4 (TNFRSF10A) | G | C | 0.58 (1KG)                                  | OR (GG/CG+CC)=2.13   | 1.031-4.397 | 0.036    |
| G3 / G1, G2                                                               | 2002 | Wang et al. [18]             | UBC            | UC           | Japanese          | 80 (G3) / 138 (G2+G1)                    | G870A(rs9344)                       | 11q13.3 | CCND1           | A | G | 0.6 (Cases) /                               | OR (A/G)=1.77        | 1.16-2.69   | 0.008    |

|                          |      |                         |                        |              |                              |                                             |                          |         |                  |   |   |                                                            |                                                                         |                                      |                |
|--------------------------|------|-------------------------|------------------------|--------------|------------------------------|---------------------------------------------|--------------------------|---------|------------------|---|---|------------------------------------------------------------|-------------------------------------------------------------------------|--------------------------------------|----------------|
|                          |      |                         |                        |              |                              |                                             |                          |         |                  |   |   | 0.45<br>(Controls)<br>/ 0.41<br>(1KG)                      |                                                                         |                                      |                |
| G3 /<br>G1+G2            | 2012 | Kucukgergin et al. [19] | UBC                    | UC           | Turkish                      | 70 (G3) / 72<br>(G1+G2)                     | CCR2 V64I<br>(rs1799864) | 3p21.31 | CCR2             | A | G | 0.15 (1KG)                                                 | OR<br>(AA/GG)=3.09<br>OR<br>(AG+AA/GG)=1.58                             | 1.02–9.34<br>1.07–2.32               | 0.045<br>0.020 |
| G3 /<br>G1+G2            | 2014 | Zhou et al. [20]        | UBC<br>(excluding Tis) | UC           | Chinese                      | 188 (G3) / 104<br>(G1+G2)                   | rs3756712                | 5p15.33 | PDCD6            | G | T | 0.40 (1KG)                                                 | OR<br>(GT/TT+GG)=2.38<br>OR<br>(GG/GT+TT)=3.57<br>OR<br>(TT+GG/GG)=1.89 | 1.35–4.17<br>1.03–12.50<br>1.05–3.33 | <0.05          |
| G3 /<br>G1+G2            | 2014 | Zhou et al. [20]        | UBC<br>(excluding Tis) | UC           | Chinese                      | 188 (G3) / 104<br>(G1+G2)                   | rs4957014                | 5p15.33 | PDCD6            | G | T | 0.65 (1KG)                                                 | OR<br>(GT+GG/TT)=1.92                                                   | 1.14–3.33                            | <0.05          |
| G3 /<br>G1+G2            | 2016 | Gautam et al. [21]      | UBC                    | UC           | Indo-European<br>(Caucasian) | 47 (G3) / 185<br>(G1+G2)                    | '-174G>C<br>(rs1800795)  | 7p15.3  | IL6              | C | G | 0.14 (1KG)                                                 | Chi-square = 10.59                                                      | N/A                                  | 0.032          |
| G3 /<br>Healthy controls | 2014 | Gu et al. [22]          | UBC                    | Not reported | Chinese                      | 117 (G3) / 670<br>(Healthy subjects)        | 696 C/T<br>(rs2664139)   | 15q14   | TSP-1<br>(THBS1) | C | T | 0.43 (1KG)                                                 | OR<br>(CC/TT+CT)=1.84                                                   | 1.00-3.36                            | 0.049          |
| G3 /<br>Healthy controls | 2017 | Ali et al. [8]          | UBC                    | UC           | Pakistani                    | 67 (High grade) /<br>200 (Healthy controls) | rs1801282                | 3p25.2  | PPARG            | G | C | 0.19<br>(Cases) /<br>0.12<br>(Controls)<br>/ 0.07<br>(1KG) | OR<br>(GG/CC)=5.97                                                      | 1.3–26                               | <0.05          |
| High grade<br>(G2+G3+G)  | 2007 | Sanyal et al. [23]      | UBC                    | Not reported | European<br>(Sweden)         | 150 (High grade) /<br>110 (Low grade)       | G39E<br>(rs1042821)      | 2p16.3  | MSH6             | A | G | 0.20 (1KG)                                                 | RR<br>(AG+AA/GG)=1.7                                                    | 1.0-3.0                              | 0.05           |



|                                                                           |      |                     |       |                       |                   |                                                                             |                      |         |             |   |   |            |                   |           |       |
|---------------------------------------------------------------------------|------|---------------------|-------|-----------------------|-------------------|-----------------------------------------------------------------------------|----------------------|---------|-------------|---|---|------------|-------------------|-----------|-------|
| 4) / Low grade (G1+G2A)                                                   |      |                     |       |                       |                   |                                                                             |                      |         |             |   |   |            |                   |           |       |
| High grade (G2B+G3) NMIBC / Low grade (G1+G2A) NMIBC (patients ≤71 years) | 2006 | Sakano et al. [14]  | NMIBC | UC                    | European (Sweden) | 56 (High grade) / 60 (Low grade)                                            | Asp1104His (rs17655) | 13q33.1 | XPG (ERCC5) | C | G | 0.36 (1KG) | OR (GC+CC/GG)=3.3 | 1.5-7.3   | 0.003 |
| G2+G3                                                                     | 2018 | Ahmed et al. [9]    | UBC   | UC                    | Pakistani         | 54 (High grade UBC) / 99 (Controls)                                         | rs2304277            | 3p25.3  | OGG1        | G | A | 0.65 (1KG) | OR (GG/AA)=3.45   | 1.52-7.80 | <0.05 |
| G2+G3                                                                     | 2018 | Ahmed et al. [9]    | UBC   | UC                    | Pakistani         | 72 (High grade UBC) / 184 (Controls)                                        | rs2228001            | 3p25.1  | XPC         | C | A | 0.32 (1KG) | OR (AC/AA)=2.81   | 1.48-5.33 | <0.05 |
| G2+G3                                                                     | 2018 | Ahmed et al. [9]    | UBC   | UC                    | Pakistani         | 57 (High grade UBC) / 167 (Controls)                                        | rs2228001            | 3p25.1  | XPC         | C | A | 0.32 (1KG) | OR (CC/AA)=2.58   | 1.09-6.11 | <0.05 |
| G2+G3                                                                     | 2018 | Ahmed et al. [9]    | UBC   | UC                    | Pakistani         | 166 (High grade UBC) / 400 (Controls) (Allele count instead of individuals) | rs2228001            | 3p25.1  | XPC         | C | A | 0.32 (1KG) | OR (C/A)=1.86     | 1.27-2.73 | <0.05 |
| G3+G4 / G1+G2                                                             | 2010 | Pandith et al. [24] | UBC   | UC + 1 adenocarcinoma | Indian            | 56 (G3+G4) / 52 (G1+G2)                                                     | Arg72Pro (rs1042522) | 17p13.1 | TP53        | C | G | 0.54 (1KG) | OR (CC+CG/GG)=4.6 | 1.4-15.6  | 0.005 |

CI-confidence interval; EA-effect allele; EAF-effect allele frequency; MIBC-muscle-invasive bladder cancer; NMIBC-non-muscle-invasive bladder cancer; OR-odds ratio; RA-reference allele; SNP-single nucleotide polymorphism; UBC-urinary bladder cancer; UC-urothelial carcinoma; 1KG-1000 Genomes Project.

174  
175  
176

#### REFERENCES

- 177 1. Safarinejad MR, Shafiei N, Safarinejad S. Genetic susceptibility of methylenetetrahydrofolate reductase (MTHFR) gene C677T, A1298C,  
178 and G1793A polymorphisms with risk for bladder transitional cell carcinoma in men. *Medical oncology* (Northwood, London, England). 2011;28  
179 Suppl 1:S398-412.
- 180 2. Sobti RC, Kaur S, Sharma VL, Singh SK, Hosseini SA, Kler R. Susceptibility of XPD and RAD51 genetic variants to carcinoma of urinary  
181 bladder in North Indian population. *DNA and cell biology*. 2012;31(2):199-210.
- 182 3. Xie L, Sun Y, Chen T, Tian D, Li Y, Zhang Y, Ding N, Shen Z, Xu H, Nian X, Sha N, Han R, Hu H, Wu C. Association between MDM2 SNP309  
183 T>G polymorphism and the risk of bladder cancer: new data in a Chinese population and an updated meta-analysis. *OncoTargets and therapy*.  
184 2015;8:3679-90.
- 185 4. Yuan L, Gu X, Shao J, Wang M, Wang M, Zhu Q, Zhang Z. Cyclin D1 G870A polymorphism is associated with risk and clinicopathologic  
186 characteristics of bladder cancer. *DNA and cell biology*. 2010;29(10):611-7.
- 187 5. Rothman N, Garcia-Closas M, Chatterjee N, Malats N, Wu X, Figueroa JD, Real FX, Van Den Berg D, Matullo G, Baris D, Thun M,  
188 Kiemeny LA, Vineis P, De Vivo I, Albanes D, Purdue MP, Rafnar T, Hildebrandt MA, Kiltie AE, Cussenot O, Golka K, Kumar R, Taylor JA,  
189 Mayordomo JI, Jacobs KB, Kogevinas M, Hutchinson A, Wang Z, Fu YP, Prokunina-Olsson L, Burdett L, Yeager M, Wheeler W, Tardon A, Serra C,  
190 Carrato A, Garcia-Closas R, Lloreta J, Johnson A, Schwenn M, Karagas MR, Schned A, Andriole G, Jr., Grubb R, 3rd, Black A, Jacobs EJ, Diver WR,  
191 Gapstur SM, Weinstein SJ, Virtamo J, Cortessis VK, Gago-Dominguez M, Pike MC, Stern MC, Yuan JM, Hunter DJ, McGrath M, Dinney CP,  
192 Czerniak B, Chen M, Yang H, Vermeulen SH, Aben KK, Witjes JA, Makkinje RR, Sulem P, Besenbacher S, Stefansson K, Riboli E, Brennan P, Panico  
193 S, Navarro C, Allen NE, Bueno-de-Mesquita HB, Trichopoulos D, Caporaso N, Landi MT, Canzian F, Ljungberg B, Tjonneland A, Clavel-Chapelon  
194 F, Bishop DT, Teo MT, Knowles MA, Guarrera S, Polidoro S, Ricceri F, Sacerdote C, Allione A, Cancel-Tassin G, Selinski S, Hengstler JG, Dietrich H,  
195 Fletcher T, Rudnai P, Gurdau E, Koppova K, Bolick SC, Godfrey A, Xu Z, Sanz-Velez JI, M DG-P, Sanchez M, Valdivia G, Porru S, Benhamou S,  
196 Hoover RN, Fraumeni JF, Jr., Silverman DT, Chanock SJ. A multi-stage genome-wide association study of bladder cancer identifies multiple  
197 susceptibility loci. *Nature genetics*. 2010;42(11):978-84.
- 198 6. Gangwar R, Ahirwar D, Mandhani A, Mittal RD. Influence of XPD and APE1 DNA repair gene polymorphism on bladder cancer  
199 susceptibility in north India. *Urology*. 2009;73(3):675-80.
- 200 7. Wang S, Tang J, Wang M, Yuan L, Zhang Z. Genetic variation in PSCA and bladder cancer susceptibility in a Chinese population.  
201 *Carcinogenesis*. 2010;31(4):621-4.
- 202 8. Ali SHB, Bangash KS, Rauf A, Younis M, Anwar K, Khurram R, Khawaja MA, Azam M, Qureshi AA, Akhter S, Kiemeny LA, Qamar R.  
203 Identification of novel potential genetic predictors of urothelial bladder carcinoma susceptibility in Pakistani population. *Familial cancer*.  
204 2017;16(4):577-94.

- 205 9. Ahmed T, Nawaz S, Noreen R, Bangash KS, Rauf A, Younis M, Anwar K, Khawaja MA, Azam M, Qureshi AA, Akhter S, Kiemeney LA,  
206 Qamar R, Ali SHB. A 3' untranslated region polymorphism rs2304277 in the DNA repair pathway gene OGG1 is a novel risk modulator for  
207 urothelial bladder carcinoma. *Annals of human genetics*. 2018;82(2):74-87.
- 208 10. Li Q, Tang T, Zhang P, Liu C, Pu Y, Zhang Y, Song H, Wang Y, Song Y, Su M, Zhou B, Zhang L. Correlation of IL-31 gene polymorphisms  
209 with susceptibility and clinical recurrence of bladder cancer. *Familial cancer*. 2018;17(4):577-85.
- 210 11. Wu J, Huang Q, Meng D, Huang M, Li C, Qin T. A Functional rs353293 Polymorphism in the Promoter of miR-143/145 Is Associated with  
211 a Reduced Risk of Bladder Cancer. *PLoS ONE*. 2016;11(7):e0159115.
- 212 12. Safarinejad MR, Shafiei N, Safarinejad SH. The association between bladder cancer and a single nucleotide polymorphism (rs2854744)  
213 in the insulin-like growth factor (IGF)-binding protein-3 (IGFBP-3) gene. *Archives of toxicology*. 2011;85(10):1209-18.
- 214 13. Safarinejad MR, Safarinejad S, Shafiei N, Safarinejad S. Association of genetic polymorphism of glutathione S-transferase (GSTM1,  
215 GSTT1, GSTP1) with bladder cancer susceptibility. *Urologic oncology*. 2013;31(7):1193-203.
- 216 14. Sakano S, Kumar R, Larsson P, Onelov E, Adolfsson J, Steineck G, Hemminki K. A single-nucleotide polymorphism in the XPG gene, and  
217 tumour stage, grade, and clinical course in patients with nonmuscle-invasive neoplasms of the urinary bladder. *BJU international*.  
218 2006;97(4):847-51.
- 219 15. Pandith AA, Shah ZA, Khan NP, Baba KM, Wani MS, Siddiqi MA. HRAS T81C polymorphism modulates risk of urinary bladder cancer and  
220 predicts advanced tumors in ethnic Kashmiri population. *Urologic oncology*. 2013;31(4):487-92.
- 221 16. Hua Q, Lv X, Gu X, Chen Y, Chu H, Du M, Gong W, Wang M, Zhang Z. Genetic variants in lncRNA H19 are associated with the risk of  
222 bladder cancer in a Chinese population. *Mutagenesis*. 2016;31(5):531-8.
- 223 17. Timirci-Kahraman O, Ozkan NE, Turan S, Farooqi AA, Verim L, Ozturk T, Inal-Gultekin G, Isbir T, Ozturk O, Yaylim I. Genetic variants in  
224 the tumor necrosis factor-related apoptosis-inducing ligand and death receptor genes contribute to susceptibility to bladder cancer. *Genetic*  
225 *testing and molecular biomarkers*. 2015;19(6):309-15.
- 226 18. Wang L, Habuchi T, Takahashi T, Mitsumori K, Kamoto T, Kakehi Y, Kakinuma H, Sato K, Nakamura A, Ogawa O, Kato T. Cyclin D1 gene  
227 polymorphism is associated with an increased risk of urinary bladder cancer. *Carcinogenesis*. 2002;23(2):257-64.
- 228 19. Kucukgergin C, Isman FK, Dasdemir S, Cakmakoglu B, Sanli O, Gokkusu C, Seckin S. The role of chemokine and chemokine receptor gene  
229 variants on the susceptibility and clinicopathological characteristics of bladder cancer. *Gene*. 2012;511(1):7-11.
- 230 20. Zhou B, Zhang P, Tang T, Zhang K, Wang Y, Song Y, Liao H, Zhang L. Prognostic value of PDCD6 polymorphisms and the susceptibility to  
231 bladder cancer. *Tumour biology : the journal of the International Society for Oncodevelopmental Biology and Medicine*. 2014;35(8):7547-54.
- 232 21. Gautam KA, Muktanand T, Sankhwar SN, Goel A, Sankhwar PL, Rajender S. Functional polymorphisms in the IL6 gene promoter and the  
233 risk of urinary bladder cancer in India. *Cytokine*. 2016;77:152-6.

- 234 22. Gu J, Tao J, Yang X, Li P, Yang X, Qin C, Cao Q, Cai H, Zhang Z, Wang M, Gu M, Lu Q, Yin C. Effects of TSP-1-696 C/T polymorphism on  
235 bladder cancer susceptibility and clinicopathologic features. *Cancer genetics*. 2014;207(6):247-52.
- 236 23. Sanyal S, De Verdier PJ, Steineck G, Larsson P, Onelov E, Hemminki K, Kumar R. Polymorphisms in XPD, XPC and the risk of death in  
237 patients with urinary bladder neoplasms. *Acta oncologica (Stockholm, Sweden)*. 2007;46(1):31-41.
- 238 24. Pandith AA, Shah ZA, Khan NP, Rasool R, Afroze D, Yousuf A, Wani S, Siddiqi M. Role of TP53 Arg72Pro polymorphism in urinary bladder  
239 cancer predisposition and predictive impact of proline related genotype in advanced tumors in an ethnic Kashmiri population. *Cancer genetics*  
240 *and cytogenetics*. 2010;203(2):263-8.
- 241

242 Supplementary Table 6. Summary associations for previously reported SNPs on urinary bladder cancer risk group at the time of diagnosis.

| Outcome                                                             | Year | Study                | Patient subgroup | Cancer subtype | Ethnic background             | Sample size (Cases/Controls)            | SNP               | Locus   | Gene         | EA | RA | EAF                                             | Effect Size       | 95% CI    | p value |
|---------------------------------------------------------------------|------|----------------------|------------------|----------------|-------------------------------|-----------------------------------------|-------------------|---------|--------------|----|----|-------------------------------------------------|-------------------|-----------|---------|
| <b>Associations for low-risk bladder cancer:</b>                    |      |                      |                  |                |                               |                                         |                   |         |              |    |    |                                                 |                   |           |         |
| <b>Associations reducing the risk of low-risk bladder cancer:</b>   |      |                      |                  |                |                               |                                         |                   |         |              |    |    |                                                 |                   |           |         |
| Low-risk (TaG2)                                                     | 2007 | Sanyal et al. [1]    | UBC              | Not reported   | European (Sweden)             | 31 (AG+AA) / 95 (GG)                    | G39E (rs1042821)  | 2p16.3  | MSH6         | A  | G  | 0.20 (1KG)                                      | RR (AG+AA/GG)=0.7 | 0.5-0.9   | 0.009   |
| Low-risk (TaG2)                                                     | 2007 | Sanyal et al. [2]    | UBC              | Not reported   | European (Sweden)             | 28 (CT+TT) / 98 (CC)                    | P187S (rs1800566) | 16q22.1 | NQO1         | T  | C  | 0.29 (1KG)                                      | RR (CT+TT/CC)=0.7 | 0.5-0.9   | 0.005   |
| <b>Associations increasing the risk of low-risk bladder cancer:</b> |      |                      |                  |                |                               |                                         |                   |         |              |    |    |                                                 |                   |           |         |
| Low-risk (TaG1)                                                     | 2007 | Sanyal et al. [1]    | UBC              | Not reported   | European (Sweden)             | 9 (TC+CC) / 2 (TT)                      | H27H (rs17350793) | 11p15.5 | HRAS         | C  | T  | 0.30 (1KG)                                      | RR (TC+CC/TT)=5.0 | 1.1-22.2  | 0.02    |
| Low-risk NMIBC (Ta+G1/G2)                                           | 2009 | Wang et al. [3]      | NMIBC            | UC             | Chinese                       | 345 (Low-risk) / 465 (Healthy controls) | rs9642880         | 8q24.21 | CASC11       | T  | G  | 0.54 (1KG)                                      | OR(TG+TT/GG)=1.71 | 1.28-2.29 | 0.0002  |
| Low-risk NMIBC (Ta+G1/G2)                                           | 2009 | Stern et al. [4]     | NMIBC (Ta+G1-2)  | UC             | Caucasian (Northern American) | 274 (Low-risk) / 578 (Healthy controls) | rs710521          | 3q28    | TP63         | A  | G  | 0.80 (1KG)                                      | OR (A/G)=1.49     | 1.17-1.91 | 0.002   |
| Low-risk NMIBC (Ta+G1/G2) / High-risk (Tis/T1/G3)                   | 2010 | Kiemene y et al. [5] | UBC              | UC             | European (multiple)           | 1559 (Low-risk) / 1875 (High-risk)      | rs798766          | 4p16.3  | TACC3/F GFR3 | T  | C  | 0.25 (Low-risk) / 0.22 (High-risk) / 0.24 (1KG) | OR (T)=1.17       | 1.04-1.31 | 0.009   |
| <b>Associations for high-risk bladder cancer:</b>                   |      |                      |                  |                |                               |                                         |                   |         |              |    |    |                                                 |                   |           |         |
| <b>Associations reducing the risk of high-risk bladder cancer:</b>  |      |                      |                  |                |                               |                                         |                   |         |              |    |    |                                                 |                   |           |         |

|                                                            |      |                        |       |              |                   |                                     |                                    |         |       |       |      |                                             |                                                               |             |          |
|------------------------------------------------------------|------|------------------------|-------|--------------|-------------------|-------------------------------------|------------------------------------|---------|-------|-------|------|---------------------------------------------|---------------------------------------------------------------|-------------|----------|
| High-risk NMIBC (TaG2-3+T1G1-3/ TaG1)                      | 2010 | Gangwar et al. [6]     | UBC   | UC           | Indian            | 64 (High-risk NMIBC) / 25 (TaG1)    | T309G (rs2279744)                  | 12q15   | MDM2  | G     | T    | 0.37 (1KG)                                  | OR (GG/TT)=0.22                                               | 0.07-0.65   | 0.006    |
| TaG2-G3+T1G1-G3 / TaG1                                     | 2013 | Jaiswal et al. [7]     | NMIBC | UC           | Indian            | 106 (High-risk) / 33 (Low-risk)     | IL18(-607) C/A (rs1946518)         | 11q23.1 | IL18  | A     | C    | 0.41 (1KG)                                  | OR (CA/CC)=0.44                                               | 0.19-0.97   | 0.042    |
| TaG2-G3+T1G1-G3 / TaG1                                     | 2013 | Jaiswal et al. [7]     | NMIBC | UC           | Indian            | 109 (High-risk) / 36 (Low-risk)     | IL18(-137) G/C (rs187238)          | 11q23.1 | IL18  | C     | G    | 0.79 (1KG)                                  | OR (GC/GG)=0.50                                               | 0.22-1.12   | 0.042    |
| High-risk NMIBC (TaG2-3+T1G1-3/ TaG1)                      | 2009 | Gangwar et al. [8]     | NMIBC | UC           | Indian            | 91 (High-risk NMIBC) / 34 (TaG1)    | 1263A>G (rs4645978)                | 1p36.21 | CASP9 | G     | A    | 0.42 (1KG)                                  | OR (AG/AA)=0.39                                               | 0.15-0.96   | 0.042    |
| High-risk NMIBC (TaG2-G3 + T1G1-3) / Low-risk NMIBC (TaG1) | 2011 | Jaiswal et al. [9]     | NMIBC | Not reported | Indian            | 112 (High-risk) / 37 (Low-risk)     | p53 codon 248 (rs11540652) A/C/G/T | 17p13.1 | TP53  | A/C/T | G    | T=0.00003 (TOPMED)                          | OR ((Arg/Trp, Arg/Gln) + (Trp/Trp, Arg/Arg))=0.32 ARG-G/GLN-A | 0.15-0.69   | 0.003    |
| G2+G3 with T1-T4 / G1+G2 with Ta                           | 2011 | Ratanajaya et al. [10] | UBC   | Not reported | Japanese          | 207 (Invasive) / 171 (Non-invasive) | rs17650301                         | 17q23.3 | POLG2 | C     | A    | 0.39 (Cases) / 0.29 (Controls) / 0.14 (1KG) | OR (A/C)=1.53                                                 | 1.13 - 2.08 | 9.50E-03 |
| High grade NMIBC (Ta+G3/T1+G2/ T1+G3)                      | 2009 | Guey et al. [11]       | NMIBC | UC           | European (Spain)  | 219 (Only reported overall)         | rs1801406                          | 13q13.1 | BRCA2 | G?    | A/C? | G=0.27 (1KG)                                | OR (G?/A?C?)=1.36                                             | 1.08-1.72   | 0.01     |
| High grade NMIBC (TaG3+T1G2-3)                             | 2009 | Guey et al. [11]       | NMIBC | UC           | European (Spain)  | 219 (Only reported overall)         | rs828702                           | 2q35    | XRCC5 | G     | A    | 0.45 (1KG)                                  | OR (G/A)=1.28                                                 | 1.03-1.58   | 0.026    |
| High-risk (TaG3+T1)                                        | 2007 | Sanyal et al. [1]      | UBC   | Not reported | European (Sweden) | 25 (AG+AA) / 31 (GG)                | G39E (rs1042821)                   | 2p16.3  | MSH6  | A     | G    | 0.20 (1KG)                                  | RR (AG+AA/GG)=1.8                                             | 1.1-2.9     | 0.02     |

|                                                    |      |                     |       |    |        |                                                                                                                                                 |                |         |               |   |   |            |                                                          |                                      |                           |
|----------------------------------------------------|------|---------------------|-------|----|--------|-------------------------------------------------------------------------------------------------------------------------------------------------|----------------|---------|---------------|---|---|------------|----------------------------------------------------------|--------------------------------------|---------------------------|
| High-risk NMIBC (TaG2-3+T1G1-3) / Healthy controls | 2009 | Gangwar et al. [12] | UBC   | UC | Indian | 60 (High-risk NMIBC) / 139 (Healthy controls)                                                                                                   | rs1052133      | 3p25.3  | OGG1          | G | C | 0.30 (1KG) | OR (GG/TT)=2.46                                          | 1.1.0-5.48                           | 0.027                     |
| High-risk NMIBC (TaG2-3+T1G1-3) / Healthy controls | 2009 | Gangwar et al. [12] | NMIBC | UC | Indian | 59 (High-risk NMIBC) / 196 (Healthy controls)<br>63 (High-risk NMIBC) / 134 (Healthy controls)<br>59 (High-risk NMIBC) / 196 (Healthy controls) | rs7003908      | 8q11.21 | XRCC7 (PRKDC) | G | T | 0.33 (1KG) | OR (GT/TT)=3.38<br>OR (GG/TT)=8.00<br>OR (GG/GT+TT)=3.16 | 1.61-7.06<br>3.74-17.10<br>1.94-5.13 | 0.001<br><0.001<br><0.001 |
| High-risk NMIBC (TaG2-3+T1G1-3/ TaG1)              | 2010 | Gangwar et al. [6]  | UBC   | UC | Indian | 73 (High-risk NMIBC) / 16 (TaG1)                                                                                                                | G870A (rs9344) | 11q13.3 | CCND1         | A | G | 0.41 (1KG) | OR (AA/GG)=4.55                                          | 1.34-15.4                            | 0.015                     |

CI-confidence interval; EA-effect allele; EAF-effect allele frequency; MIBC-muscle-invasive bladder cancer; NMIBC-non-muscle-invasive bladder cancer; OR-odds ratio; RA-reference allele; SNP-single nucleotide polymorphism; UBC-urinary bladder cancer; UC-urothelial carcinoma; 1KG-1000 Genomes Project.

243  
244  
245

#### REFERENCES

- 246 1. Sanyal S, De Verdier PJ, Steineck G, Larsson P, Onelov E, Hemminki K, Kumar R. Polymorphisms in XPD, XPC and the risk of death in  
247 patients with urinary bladder neoplasms. *Acta oncologica (Stockholm, Sweden)*. 2007;46(1):31-41.
- 248 2. Sanyal S, Ryk C, De Verdier PJ, Steineck G, Larsson P, Onelov E, Hemminki K, Kumar R. Polymorphisms in NQO1 and the clinical course of  
249 urinary bladder neoplasms. *Scandinavian journal of urology and nephrology*. 2007;41(3):182-90.
- 250 3. Wang M, Wang M, Zhang W, Yuan L, Fu G, Wei Q, Zhang Z. Common genetic variants on 8q24 contribute to susceptibility to bladder  
251 cancer in a Chinese population. *Carcinogenesis*. 2009;30(6):991-6.
- 252 4. Stern MC, Van Den Berg D, Yuan JM, Conti DV, Gago-Dominguez M, Pike MC, Xiang YB, Gao YT, Cortessis VK. Sequence variant on 3q28  
253 and urinary bladder cancer risk: findings from the Los Angeles-Shanghai bladder case-control study. *Cancer epidemiology, biomarkers &*

254 prevention : a publication of the American Association for Cancer Research, cosponsored by the American Society of Preventive Oncology.  
255 2009;18(11):3057-61.

256 5. Kiemeny LA, Sulem P, Besenbacher S, Vermeulen SH, Sigurdsson A, Thorleifsson G, Gudbjartsson DF, Stacey SN, Gudmundsson J,  
257 Zanon C, Kostic J, Masson G, Bjarnason H, Palsson ST, Skarphedinsson OB, Gudjonsson SA, Witjes JA, Grotenhuis AJ, Verhaegh GW, Bishop DT,  
258 Sak SC, Choudhury A, Elliott F, Barrett JH, Hurst CD, de Verdier PJ, Ryk C, Rudnai P, Gurzau E, Koppova K, Vineis P, Polidoro S, Guarrera S,  
259 Sacerdote C, Campagna M, Placidi D, Arici C, Zeegers MP, Kellen E, Gutierrez BS, Sanz-Velez JI, Sanchez-Zalabardo M, Valdivia G, Garcia-Prats  
260 MD, Hengstler JG, Blaszkewicz M, Dietrich H, Ophoff RA, van den Berg LH, Alexiusdottir K, Kristjansson K, Geirsson G, Nikulasson S, Petursdottir  
261 V, Kong A, Thorgeirsson T, Mungan NA, Lindblom A, van Es MA, Porru S, Buntinx F, Golka K, Mayordomo JI, Kumar R, Matullo G, Steineck G,  
262 Kiltie AE, Aben KKH, Jonsson E, Thorsteinsdottir U, Knowles MA, Rafnar T, Stefansson K. A sequence variant at 4p16.3 confers susceptibility to  
263 urinary bladder cancer. *Nature genetics*. 2010;42(5):415-9.

264 6. Gangwar R, Mittal RD. Association of selected variants in genes involved in cell cycle and apoptosis with bladder cancer risk in North  
265 Indian population. *DNA and cell biology*. 2010;29(7):349-56.

266 7. Jaiswal PK, Singh V, Srivastava P, Mittal RD. Association of IL-12, IL-18 variants and serum IL-18 with bladder cancer susceptibility in  
267 North Indian population. *Gene*. 2013;519(1):128-34.

268 8. Gangwar R, Mandhani A, Mittal RD. Caspase 9 and caspase 8 gene polymorphisms and susceptibility to bladder cancer in north Indian  
269 population. *Annals of surgical oncology*. 2009;16(7):2028-34.

270 9. Jaiswal PK, Goel A, Mittal RD. Association of p53 codon 248 (exon7) with urinary bladder cancer risk in the North Indian population.  
271 *Bioscience trends*. 2011;5(5):205-10.

272 10. Ratanajaraya C, Nishiyama H, Takahashi M, Kawaguchi T, Saito R, Mikami Y, Suyama M, Lathrop M, Yamada R, Ogawa O, Matsuda F. A  
273 polymorphism of the POLG2 gene is genetically associated with the invasiveness of urinary bladder cancer in Japanese males. *Journal of human  
274 genetics*. 2011;56(8):572-6.

275 11. Guey LT, Garcia-Closas M, Murta-Nascimento C, Lloreta J, Palencia L, Kogevinas M, Rothman N, Vellalta G, Calle ML, Marenne G, Tardon  
276 A, Carrato A, Garcia-Closas R, Serra C, Silverman DT, Chanock S, Real FX, Malats N. Genetic susceptibility to distinct bladder cancer  
277 subphenotypes. *European urology*. 2010;57(2):283-92.

278 12. Gangwar R, Ahirwar D, Mandhani A, Mittal RD. Do DNA repair genes OGG1, XRCC3 and XRCC7 have an impact on susceptibility to  
279 bladder cancer in the North Indian population? *Mutation research*. 2009;680(1-2):56-63.  
280



281 Supplementary Table 7. Summary associations for previously reported SNPs on urinary bladder cancer recurrence.

| Outcome                                                             | Year | Study                | Patient subgroup    | Cancer subtype | Ethnic background             | Sample size (Cases/Controls)         | SNP                   | Locus   | Gene  | EA | RA | EAF        | Effect Size        | 95% CI    | p value |
|---------------------------------------------------------------------|------|----------------------|---------------------|----------------|-------------------------------|--------------------------------------|-----------------------|---------|-------|----|----|------------|--------------------|-----------|---------|
| <b>Associations reducing the risk of bladder cancer recurrence:</b> |      |                      |                     |                |                               |                                      |                       |         |       |    |    |            |                    |           |         |
| NMIBC recurrence (non-BCG-treated)                                  | 2005 | Leibovici et al. [1] | NMIBC               | Not reported   | Caucasian (White)             | 60 (Recurrence) / 29 (No recurrence) | Pro12Ala (rs1801282)  | 3p25.2  | PPARG | G  | C  | 0.07 (1KG) | HR (CG+GG/CC)=0.41 | 0.20-0.86 | <0.05   |
| NMIBC recurrence (<64 year-old group)                               | 2006 | Zhao et al. [2]      | NMIBC               | UC + Other     | Caucasian (Northern American) | 48 (Recurrence) / 51 (No recurrence) | Pro198Leu (rs1050450) | 3p21.31 | GPX1  | T  | C  | 0.22 (1KG) | HR (CT+TT/CC)=0.37 | 0.20-0.70 | <0.05   |
| NMIBC recurrence (BCG-treated)                                      | 2006 | Lin et al. [3]       | NMIBC (BCG-treated) | UC + Other     | Caucasian (Northern American) | 18 (Recurrence) / 30 (No recurrence) | C160A (rs16260)       | 16q22.1 | CDH1  | A  | C  | 0.24 (1KG) | HR (AC+AA/CC)=0.21 | 0.07-0.63 | <0.05   |
| NMIBC recurrence (BCG-treated)                                      | 2008 | Ahirwar et al. [4]   | NMIBC (BCG-treated) | Not reported   | Indian                        | 22 (Recurrence) / 33 (No recurrence) | 174G/C (rs1800795)    | 7p15.3  | IL6   | C  | G  | 0.14 (1KG) | HR (CC/GG)=0.298   | 0.09-0.91 | 0.03    |
| NMIBC Recurrence (TUR-treated)                                      | 2009 | Horikawa et al. [5]  | NMIBC               | UC             | Japanese                      | 49 (Recurrence) / 38 (No recurrence) | Arg72Pro (rs1042522)  | 17p13.1 | TP53  | C  | G  | 0.54 (1KG) | HR (CC/CG+GG)=0.36 | 0.14-0.93 | 0.035   |
| NMIBC recurrence (BCG-treated)                                      | 2009 | Ahirwar et al. [6]   | NMIBC               | UC             | Indian                        | 19 (Recurrence) / 32 (No recurrence) | 1031T>C (rs1799964)   | 6p21.33 | TNFA  | C  | T  | 0.22 (1KG) | HR (CC/TT)=0.38    | 0.14-0.98 | 0.024   |
| NMIBC recurrence (BCG-treated)                                      | 2009 | Gangwar et al. [7]   | NMIBC               | UC             | Indian                        | 20 (Recurrence) / 32 (No recurrence) | 1263A>G (rs4645978)   | 1p36.21 | CASP9 | G  | A  | 0.42 (1KG) | HR (GG/AA)=0.22    | 0.62-0.75 | 0.005   |

|                                |      |                     |                     |              |                               |                                                                             |                            |         |                  |   |   |             |                                    |                        |                |
|--------------------------------|------|---------------------|---------------------|--------------|-------------------------------|-----------------------------------------------------------------------------|----------------------------|---------|------------------|---|---|-------------|------------------------------------|------------------------|----------------|
| NMIBC Recurrence (BCG-treated) | 2009 | Gangwar et al. [8]  | UBC                 | UC           | Indian                        | 20 (Recurrence) / 27 (No recurrence)                                        | rs7003908                  | 8q11.21 | XRCC7 (PRKDC)    | G | T | 0.33 (1KG)  | HR (GG/TT)=0.25                    | 0.09-0.65              | 0.004          |
| NMIBC Recurrence (BCG-treated) | 2010 | Gangwar et al. [9]  | NMIBC               | UC           | Indian                        | 21 (Recurrence) / 26 (No recurrence)                                        | T309G (rs2279744)          | 12q15   | MDM2             | G | T | 0.37 (1KG)  | HR (GG/TT)=0.25                    | 0.08-0.80              | 0.019          |
| UBC Recurrence (BCG-treated)   | 2010 | Ahirwar et al. [10] | UBC                 | Not reported | Indian                        | 22 (Recurrence) / 32 (No recurrence)                                        | rs4073                     | 4q13.3  | IL8 (CXCL8)      | A | T | 0.52 (1KG)  | HR (AA/TT)=0.12                    | 0.04-0.41              | <0.001         |
| NMIBC Recurrence (BCG-treated) | 2012 | Jaiswal et al. [11] | NMIBC               | Not reported | Indian                        | 32 (Recurrence) / 31 (No recurrence) / 25 (Recurrence) / 26 (No recurrence) | Survivin 31G>C (rs9904341) | 17q25.3 | Survivin (BIRC5) | C | G | 0.39 (1KG)  | HR (CG/GG)=0.35<br>HR (CC/GG)=0.22 | 0.16-0.77<br>0.05-0.95 | 0.009<br>0.043 |
| NMIBC Recurrence (BCG-treated) | 2012 | Wei et al. [12]     | NMIBC               | UC           | Caucasian (Northern American) | 110 (Recurrence) / 82 (No recurrence)                                       | rs804267                   | 8p23.1  | NEIL2            | C | T | 0.31 (1KG)  | HR (CT/TT)=0.53                    | 0.36-0.78              | 0.001          |
| NMIBC Recurrence (BCG-treated) | 2012 | Wei et al. [12]     | NMIBC               | UC           | Caucasian (Northern American) | 110 (Recurrence) / 82 (No recurrence)                                       | rs8191604                  | 8p23.1  | NEIL2            | C | A | 0.18 (1KG)  | HR (CA/AA)=0.54                    | 0.36-0.81              | 0.003          |
| NMIBC Recurrence               | 2012 | Wang et al. [13]    | NMIBC               | UC           | Chinese                       | 74 (Recurrence) / 125 (No recurrence)                                       | rs2910164                  | 5q33.3  | MIR146A          | C | G | 0.28 (ExAC) | (HR (GC+CC/GG)=0.58                | 0.36-0.94              | 0.016          |
| NMIBC Recurrence (TUR-treated) | 2013 | Ke et al. [14]      | NMIBC (TUR-treated) | Not reported | Caucasian (Northern American) | 91 (Recurrence) / 45 (No recurrence)                                        | rs197412                   | 1p13.2  | DDX20            | T | C | 0.53 (1KG)  | HR (TT+TC/CC)=0.58                 | 0.40-0.82              | 0.002          |

|                                             |      |                   |                                        |              |                               |                                                                              |            |          |       |   |   |            |                                             |                            |                                      |
|---------------------------------------------|------|-------------------|----------------------------------------|--------------|-------------------------------|------------------------------------------------------------------------------|------------|----------|-------|---|---|------------|---------------------------------------------|----------------------------|--------------------------------------|
| NMIBC Recurrence                            | 2013 | Lee et al. [15]   | NMIBC                                  | UC           | Caucasian (Northern American) | 232 (Recurrence) / 189 (No recurrence)                                       | rs511918   | 1q25.3   | RGS16 | T | G | 0.47 (1KG) | HR (T/G)=0.81                               | 0.66-0.99                  | 0.0381                               |
| NMIBC Recurrence                            | 2013 | Lee et al. [15]   | NMIBC                                  | UC           | Caucasian (Northern American) | 232 (Recurrence) / 189 (No recurrence)                                       | rs16829458 | 1q31.2   | RGS2  | A | G | 0.12 (1KG) | HR (AG/GG)=0.63                             | 0.41-0.95                  | 0.0268                               |
| NMIBC Recurrence                            | 2013 | Lee et al. [15]   | NMIBC                                  | UC           | Caucasian (Northern American) | 232 (Recurrence) / 189 (No recurrence)                                       | rs3795617  | 1q31.2   | RGS13 | A | G | 0.38 (1KG) | HR (A/G)=0.79                               | 0.65-0.96                  | 0.0187                               |
| NMIBC Recurrence                            | 2014 | Zhang et al. [16] | NMIBC                                  | UC           | Chinese                       | 28 (AT) / 297 (TT)                                                           | rs2505568  | 7q22.3   | NAMPT | A | T | 0.57 (1KG) | HR (AT/TT)=0.30                             | 0.09-0.97                  | 0.03 (log-rank)                      |
| UBC Recurrence                              | 2014 | Zhang et al. [16] | UBC                                    | UC           | Chinese                       | 95 (Recurrence) / 230 (No recurrence)                                        | rs2505568  | 7q22.3   | NAMPT | A | T | 0.57 (1KG) | OR (AT/TT)=0.25                             | 0.07-0.86                  | <0.05                                |
| NMIBC Recurrence (TUR- and BCG-treated)     | 2015 | Lima et al. [17]  | NMIBC after TUR+BCG                    | Not reported | European (Southern Portugal)  | 70 (Recurrence) / 134 (No recurrence)                                        | rs391835   | 3p21.31  | CCR2  | A | G | 0.41 (1KG) | HR (AA/GG)=0.410<br>HR (GA+AA/GG)=0.455     | 0.191-0.879<br>0.232-0.893 | 0.022<br>0.022                       |
| NMIBC Recurrence (TUR-treated + Epirubicin) | 2015 | Deng et al. [18]  | UBC (TUR- and Epirubicin-treated)      | Not reported | Chinese                       | 49 (Recurrence) / 75 (No recurrence)<br>50 (Recurrence) / 80 (No recurrence) | rs2854509  | 19q13.31 | XRCC1 | A | C | 0.82 (1KG) | HR (AC/CC)=0.24<br>HR (AC+AA/CC)=0.23       | 0.10-0.57<br>0.10-0.53     | 0.036 (log-rank)<br>0.010 (log-rank) |
| NMIBC Recurrence (TUR-treated + Epirubicin) | 2015 | Deng et al. [18]  | UBC (TUR- and Epirubicin-treated)      | Not reported | Chinese                       | 48 (Recurrence) / 77 (No recurrence)<br>50 (Recurrence) / 80 (No recurrence) | rs3213255  | 19q13.31 | XRCC1 | C | T | 0.32 (1KG) | HR (CT/TT)=0.17<br>HR (CT+CC/TT)=0.17       | 0.58-0.50<br>0.06-0.46     | 0.001 (log-rank)<br>0.001 (log-rank) |
| High-risk NMIBC Recurrence                  | 2015 | Ryk et al. [19]   | High-risk (either TaG3, T1, TaG1+conC) | UC           | European (Sweden)             | 5 (TT, BCG-treated) / 12 (TT, not BCG-treated)                               | rs2070744  | 7q36.1   | NOS3  | T | C | 0.77 (1KG) | HR (BCG-treated TT/Not BCG-treated TT)=0.23 | 0.08-0.70                  | 0.009                                |

|                                          |      |                 |                                                                                              |    |                   |                                                 |                        |        |      |   |   |            |                                                   |             |        |
|------------------------------------------|------|-----------------|----------------------------------------------------------------------------------------------|----|-------------------|-------------------------------------------------|------------------------|--------|------|---|---|------------|---------------------------------------------------|-------------|--------|
| (BCG-treated)                            |      |                 | IS,TaG2+conCIS or primary CIS) NMIBC (treated with BCG)                                      |    |                   |                                                 |                        |        |      |   |   |            |                                                   |             |        |
| High-risk NMIBC Recurrence (BCG-treated) | 2015 | Ryk et al. [19] | High-risk (either TaG3, T1, TaG1+conCIS,TaG2+conCIS or primary CIS) NMIBC (treated with BCG) | UC | European (Sweden) | 17 (TT, BCG-treated) / 15 (TT, not BCG-treated) | rs2070744              | 7q36.1 | NOS3 | T | C | 0.77 (1KG) | HR (BCG-treated CT+CC/Not BCG-treated CT+CC)=0.25 | 0.11–0.54   | <0.001 |
| High-risk NMIBC Recurrence (BCG-treated) | 2015 | Ryk et al. [19] | High-risk (either TaG3, T1, TaG1+conCIS,TaG2+conCIS or primary CIS) NMIBC (treated with BCG) | UC | European (Sweden) | 7 (GG, BCG-treated) / 9 (GG, not BCG-treated)   | rs1799983              | 7q36.1 | NOS3 | G | T | 0.82 (1KG) | HR (BCG-treated GG/Not BCG-treated GG)=0.29       | 0.10–0.87   | 0.028  |
| NMIBC Recurrence                         | 2015 | Xie et al. [20] | NMIBC                                                                                        | UC | Chinese           | 62 (Recurrence) / 259 (No recurrence)           | SNP309 T>G (rs2279744) | 12q15  | MDM2 | G | T | 0.37 (1KG) | OR (TG/TT)=0.562                                  | 0.338–0.933 | 0.026  |
| NMIBC Recurrence                         | 2015 | Xie et al. [20] | NMIBC                                                                                        | UC | Chinese           | 49 (Recurrence) / 178 (No recurrence)           | SNP309 T>G (rs2279744) | 12q15  | MDM2 | G | T | 0.37 (1KG) | OR (GG/TT)=0.501                                  | 0.279–0.900 | 0.021  |

|                                                                       |      |                      |                            |              |                               |                                                                                                |                        |          |       |   |   |            |                                                          |                                        |                         |
|-----------------------------------------------------------------------|------|----------------------|----------------------------|--------------|-------------------------------|------------------------------------------------------------------------------------------------|------------------------|----------|-------|---|---|------------|----------------------------------------------------------|----------------------------------------|-------------------------|
| NMIBC Recurrence                                                      | 2015 | Xie et al. [20]      | NMIBC                      | UC           | Chinese                       | 81 (Recurrence) / 362 (No recurrence)                                                          | SNP309 T>G (rs2279744) | 12q15    | MDM2  | G | T | 0.37 (1KG) | OR (TG+GG/TT)=0.531                                      | 0.336-0.839                            | 0.007                   |
| NMIBC Recurrence (Epirubicin-treated)                                 | 2015 | Li et al. [21]       | NMIBC (Epirubicin-treated) | UC           | Chinese                       | 47 (Recurrence) / 78 (No recurrence)                                                           | rs915927               | 19q13.2  | XRCC1 | G | A | 0.32 (1KG) | HR (AG/AA)=0.21                                          | 0.08-0.53                              | 0.02                    |
| NMIBC Recurrence (Epirubicin-treated)                                 | 2015 | Li et al. [21]       | NMIBC (Epirubicin-treated) | UC           | Chinese                       | 48 (Recurrence) / 81 (No recurrence)                                                           | rs915927               | 19q13.2  | XRCC1 | G | A | 0.32 (1KG) | HR (AG+GG/AA)=0.24                                       | 0.10-0.59                              | 0.009                   |
| NMIBC Recurrence (Epirubicin-treated)                                 | 2015 | Li et al. [21]       | NMIBC (Epirubicin-treated) | UC           | Chinese                       | 46 (Recurrence) / 78 (No recurrence)                                                           | rs2854501              | 19q13.2  | XRCC1 | T | C | 0.18 (1KG) | HR (CT/CC)=0.10                                          | 0.03-0.35                              | 0.002                   |
| NMIBC Recurrence (Epirubicin-treated)                                 | 2015 | Li et al. [21]       | NMIBC (Epirubicin-treated) | UC           | Chinese                       | 48 (Recurrence) / 81 (No recurrence)                                                           | rs2854501              | 19q13.2  | XRCC1 | T | C | 0.18 (1KG) | HR (CT+TT/CC)=0.16                                       | 0.06-0.43                              | 0.001                   |
| <b>Associations increasing the risk of bladder cancer recurrence:</b> |      |                      |                            |              |                               |                                                                                                |                        |          |       |   |   |            |                                                          |                                        |                         |
| NMIBC Recurrence                                                      | 2005 | Kim et al. [22]      | NMIBC                      | UC           | Korean                        | 38 (Recurrence) / 55 (No recurrence)                                                           | Ser326Cys (rs1052133)  | 3p25.3   | OGG1  | G | C | 0.30 (1KG) | OR (CG+GG/CC)=6.49                                       | 1.25-33.3                              | 0.026                   |
| NMIBC recurrence (BCG-treated)                                        | 2005 | Gu et al. [23]       | NMIBC (BCG-treated)        | Not reported | Caucasian (Northern American) | 121 (Recurrence) / 77 (No recurrence)                                                          | Met1097Val (rs2228526) | 10q11.23 | ERCC6 | C | G | 0.18 (1KG) | HR (CG+CC/GG)=1.54                                       | 1.02-2.33                              | <0.05                   |
| NMIBC recurrence (maintenance BCG-treated)                            | 2005 | Leibovici et al. [1] | NMIBC (BCG-treated)        | Not reported | Caucasian (White)             | 12 (Recurrence) / 16 (No recurrence) / 8 (Recurrence) / 10 (No recurrence) / 16 (Recurrence) / | 174G/C (rs1800795)     | 7p15.3   | IL6   | C | G | 0.14 (1KG) | HR (GC/GG)=4.31<br>HR (CC/GG)=5.47<br>HR (CG+CC/GG)=4.60 | 1.09-17.09<br>1.05-28.44<br>1.24-17.09 | <0.05<br><0.05<br><0.05 |

|                                    |      |                      |                     |              |                      |                                                                             |                             |         |                  |   |   |            |                                       |                        |                |  |
|------------------------------------|------|----------------------|---------------------|--------------|----------------------|-----------------------------------------------------------------------------|-----------------------------|---------|------------------|---|---|------------|---------------------------------------|------------------------|----------------|--|
|                                    |      |                      |                     |              |                      | 17 (No recurrence)                                                          |                             |         |                  |   |   |            |                                       |                        |                |  |
| NMIBC recurrence (BCG-treated)     | 2006 | Decobert et al. [24] | NMIBC (BCG-treated) | Not reported | Caucasian (Canadian) | 51 (Recurrence) / 16 (No recurrence)                                        | D543N (rs17235409)          | 2q35    | NRAMP1 (SLC11A1) | A | G | 0.07 (1KG) | HR (AG/GG)=5.74                       | 2.4-13.8               | <0.001         |  |
| NMIBC recurrence (BCG-treated)     | 2008 | Mittal et al. [25]   | NMIBC               | UC           | Indian               | 19 (Recurrence) / 16 (No recurrence)                                        | Codon 194 (rs1799782)       | 19q13.2 | XRCC1            | T | C | 0.12 (1KG) | OR (CT/CC)=4.57                       | 1.10-18.97             | 0.03           |  |
| NMIBC recurrence (BCG-treated)     | 2008 | Mittal et al. [25]   | NMIBC (BCG-treated) | UC           | Indian               | 10 (recurrence) / 15 (No recurrence)                                        | Codon 399 (rs25487)         | 19q13.2 | XRCC1            | A | G | 0.26 (1KG) | HR (AA/GG)=5.05                       | 1.34-19.01             | 0.01           |  |
| NMIBC recurrence (BCG-treated)     | 2009 | Gangwar et al. [26]  | NMIBC               | Not reported | Indian               | 27 (Recurrence) / 19 (No recurrence)                                        | Asp312Asn (G>A) (rs1799793) | 19q13.3 | ERCC2            | A | G | 0.19 (1KG) | HR(AA/GG)=3.07                        | 1.22-7.68              | 0.016          |  |
| NMIBC recurrence (BCG-treated)     | 2009 | Ahirwar et al. [27]  | NMIBC               | UC           | Indian               | 21 (Recurrence) / 29 (No recurrence) / 23 (Recurrence) / 23 (No Recurrence) | rs2430561                   | 12q15   | IFN-G            | A | T | 0.28 (1KG) | HR (TA/TT)=2.80<br>HR (A/T)=2.24      | 1.13-6.97<br>1.06-5.80 | 0.024<br>0.036 |  |
| NMIBC Recurrence (non-BCG-treated) | 2009 | Gangwar et al. [8]   | UBC                 | UC           | Indian               | 20 (Recurrence) / 23 (No recurrence)                                        | rs1052133                   | 3p25.3  | OGG1             | G | C | 0.30 (1KG) | HR (GG/TT)=4.04                       | 1.33-12.1              | 0.013          |  |
| NMIBC Recurrence (BCG-treated)     | 2010 | Gangwar et al. [28]  | NMIBC               | UC           | Indian               | 14 (Recurrence) / 27 (No recurrence) / 28 (recurrence) / 49 (No recurrence) | Lys939Gln (rs2228001)       | 3p25.1  | XPC              | C | A | 0.32 (1KG) | HR (CC/AA)=3.21<br>HR (AC+CC/AA)=3.98 | 1.07-9.61<br>1.02-10.7 | 0.036<br><0.05 |  |

|                                |      |                      |       |            |                                                                   |                                                                                  |                       |          |              |   |   |                                        |                                  |                        |                |
|--------------------------------|------|----------------------|-------|------------|-------------------------------------------------------------------|----------------------------------------------------------------------------------|-----------------------|----------|--------------|---|---|----------------------------------------|----------------------------------|------------------------|----------------|
| Low-risk NMIBC recurrence      | 2010 | Wang et al. [29]     | NMIBC | UC         | Chinese                                                           | 24 (Recurrence) / 24 (No recurrence)                                             | XPF 357A>C (rs744154) | 16p13.12 | XPF (ERCC4)  | C | A | 0.22 (1KG)                             | HR (AC+CC/AA)=3.62               | 1.42-9.28              | <0.05          |
| Low-risk NMIBC recurrence      | 2010 | Kiemeney et al. [30] | UBC   | UC         | European (multiple)                                               | 305 (Recurrence) / 358 (No recurrence)<br>322 (Recurrence) / 375 (No recurrence) | rs798766              | 4p16.3   | TACC3/F GFR3 | T | C | 0.25 (All low-risk NMIBC) / 0.24 (1KG) | HR (CT/CC)=1.31<br>HR (T/C)=1.23 | 1.04-1.64<br>1.04-1.47 | 0.020<br>0.019 |
| NMIBC Recurrence (BCG-treated) | 2010 | Chen et al. [31]     | NMIBC | UC + Other | Caucasians (Northern American) + European (Spain) for replication | 118 (Recurrence) / 83 (No recurrence)                                            | rs6463089             | 7p14.1   | GLI3         | A | G | 0.09 (1KG)                             | HR (AG+AA/GG)=2.40               | 1.50-3.84              | 2.00E-04       |
| NMIBC Recurrence (BCG-treated) | 2010 | Chen et al. [31]     | NMIBC | UC + Other | Caucasians (Northern American) + European (Spain) for replication | 117 (Recurrence) / 83 (No recurrence)                                            | rs3801192             | 7p14.1   | GLI3         | A | G | 0.07 (1KG)                             | HR (AG+AA/GG)=2.54               | 1.47-4.39              | 9.00E-04       |
| NMIBC Recurrence (TUR-treated) | 2010 | Chen et al. [31]     | NMIBC | UC + Other | Caucasians (Northern American) + European (Spain) for replication | 230 (Recurrence) / 272 (No recurrence)                                           | rs1233560             | 7q36.3   | SSH          | G | A | 0.46 (1KG)                             | HR (G/A)=1.39                    | 1.14-1.70              | 0.001          |
| NMIBC Recurrence (TUR-treated) | 2010 | Chen et al. [31]     | NMIBC | UC + Other | Caucasians (Northern American) + European (Spain) for replication | 230 (Recurrence) / 272 (No recurrence)                                           | rs11685068            | 2q14.2   | GLI2         | A | G | 0.06 (1KG)                             | HR (AG+AA/GG)=2.07               | 1.33-3.21              | 0.0013         |

|                                          |      |                               |                            |                     |                                     |                                                                                          |                                 |          |                         |   |   |               |                                       |                                 |                |
|------------------------------------------|------|-------------------------------|----------------------------|---------------------|-------------------------------------|------------------------------------------------------------------------------------------|---------------------------------|----------|-------------------------|---|---|---------------|---------------------------------------|---------------------------------|----------------|
| NMIBC<br>Recurrence<br>(BCG-<br>treated) | 2010 | Chiong<br>et al.<br>[32]      | NMIBC<br>(BCG-<br>treated) | UC                  | Chinese                             | 19 (Recurrence) /<br>4 (No recurrence)                                                   | D543N<br>(rs17235409<br>)       | 2q35     | NRAMP1<br>(SLC11A1<br>) | G | A | 0.93<br>(1KG) | HR (GG/AG)=3.0                        | 1.03–<br>8.9                    | 0.033          |
| NMIBC<br>Recurrence<br>(BCG-<br>treated) | 2011 | Srivasta<br>va et al.<br>[33] | NMIBC<br>(BCG-<br>treated) | UC                  | Indian                              | 31 (Recurrence) /<br>41 (No<br>recurrence)<br>34 (Recurrence) /<br>44 (No<br>recurrence) | rs243865                        | 16q12.2  | MMP2                    | C | T | 0.86<br>(1KG) | HR (CT/CC)=4.32<br>HR (CT+TT/CC)=2.06 | 1.51–<br>12.39<br>1.01–<br>4.18 | 0.006<br>0.047 |
| NMIBC<br>Recurrence<br>(BCG-<br>treated) | 2012 | Wei et<br>al. [12]            | NMIBC                      | UC                  | Caucasian<br>(Northern<br>American) | 110 (Recurrence)<br>/ 82 (No<br>recurrence)                                              | rs804256                        | 8p23.1   | NEIL2                   | C | T | 0.26<br>(1KG) | HR (CC/CT+TT)=4.58                    | 2.61–<br>8.02                   | 1.00E-<br>07   |
| NMIBC<br>Recurrence<br>(BCG-<br>treated) | 2012 | Wei et<br>al. [12]            | NMIBC                      | UC                  | Caucasian<br>(Northern<br>American) | 110 (Recurrence)<br>/ 82 (No<br>recurrence)                                              | rs804276                        | 8p23.1   | NEIL2                   | G | A | 0.62<br>(1KG) | HR<br>(GG/AG+AA)=2.71                 | 1.75–<br>4.20                   | 9.00E-<br>06   |
| NMIBC<br>Recurrence<br>(BCG-<br>treated) | 2012 | Wei et<br>al. [12]            | NMIBC                      | UC                  | Caucasian<br>(Northern<br>American) | 110 (Recurrence)<br>/ 82 (No<br>recurrence)                                              | rs4639                          | 8p23.1   | NEIL2                   | G | A | 0.47<br>(1KG) | HR<br>(GG/AG+AA)=2.60                 | 1.68–<br>4.03                   | 2.00E-<br>05   |
| NMIBC<br>Recurrence<br>(BCG-<br>treated) | 2012 | Wei et<br>al. [12]            | NMIBC                      | UC                  | Caucasian<br>(Northern<br>American) | 110 (Recurrence)<br>/ 82 (No<br>recurrence)                                              | rs2173962                       | 21q22.11 | SOD1                    | G | A | 0.06<br>(1KG) | HR (GA/AA)=2.45                       | 1.42–<br>4.23                   | 0.001          |
| NMIBC<br>Recurrence<br>(TUR-<br>treated) | 2013 | Ke et al.<br>[14]             | NMIBC<br>(TUR-<br>treated) | Not<br>reporte<br>d | Caucasian<br>(Northern<br>American) | 91 (Recurrence) /<br>45 (No<br>recurrence)                                               | rs12186785                      | 5p13.3   | RNASEN<br>(DROSHA<br>)  | C | T | 0.05<br>(1KG) | HR (CT/TT)= 2.15                      | 1.25–<br>3.68                   | 0.005          |
| NMIBC<br>Recurrence<br>(BCG-<br>treated) | 2013 | Jaiswal<br>et al.<br>[34]     | NMIBC<br>(BCG-<br>treated) | UC                  | Indian                              | 32 (Recurrence) /<br>42 (No<br>recurrence)                                               | IL18(-137)<br>G/C<br>(rs187238) | 11q23.1  | IL18                    | C | G | 0.79<br>(1KG) | HR (GC/GG)=2.35                       | 1.09-<br>5.10                   | 0.030          |



|                                         |      |                    |                     |              |                               |                                                                            |            |          |       |   |   |            |                     |             |                   |
|-----------------------------------------|------|--------------------|---------------------|--------------|-------------------------------|----------------------------------------------------------------------------|------------|----------|-------|---|---|------------|---------------------|-------------|-------------------|
| NMIBC Recurrence                        | 2013 | Lee et al. [15]    | NMIBC               | UC           | Caucasian (Northern American) | 232 (Recurrence) / 189 (No recurrence)                                     | rs11199005 | 10q26.11 | RGS10 | A | G | 0.35 (1KG) | HR (AG/GG)=1.47     | 1.02-2.12   | 0.041             |
| NMIBC Recurrence                        | 2013 | Lee et al. [15]    | NMIBC               | UC           | Caucasian (Northern American) | 232 (Recurrence) / 189 (No recurrence)                                     | rs1323291  | 1q31.2   | RGS1  | C | A | 0.15 (1KG) | HR (CA/AA)=1.60     | 1.13-2.28   | 0.0084            |
| NMIBC Recurrence                        | 2014 | Andrew et al. [35] | NMIBC               | UC + Other   | Caucasian (Northern American) | 279 (Recurrence) / 248 (No recurrence) (but not presented for NMIBC group) | rs5742714  | 12q23.2  | IGF1  | C | G | 0.9 (1KG)  | HR (GC/GG)=1.61     | 1.19-2.17   | 0.002 (log-rank)  |
| NMIBC Recurrence                        | 2014 | Andrew et al. [35] | NMIBC               | UC + Other   | Caucasian (Northern American) | 279 (Recurrence) / 248 (No recurrence) (but not presented for NMIBC group) | rs2238151  | 12q24.12 | ALDH2 | C | T | 0.7 (1KG)  | HR (CC/TT)=1.94     | 1.32-2.85   | <0.001 (log-rank) |
| MIBC Recurrence                         | 2014 | Zhou et al. [36]   | MIBC                | UC           | Chinese                       | 47 (Recurrence) / 156 (No recurrence)                                      | rs4957014  | 5p15.33  | PDCD6 | G | T | 0.65 (1KG) | HR (GT/TT+GG)=1.93  | 1.08-3.45   | 0.03              |
| NMIBC Recurrence (TUR- and BCG-treated) | 2015 | Lima et al. [17]   | NMIBC after TUR+BCG | Not reported | European (Southern Portugal)  | 70 (Recurrence) / 134 (No recurrence)                                      | rs5498     | 19p13.2  | ICAM1 | G | A | 0.36 (1KG) | HR (GG/AA+AG)=1.76  | 1.050-2.949 | 0.032             |
| NMIBC Recurrence (TUR- and BCG-treated) | 2015 | Lima et al. [17]   | NMIBC after TUR+BCG | Not reported | European (Southern Portugal)  | 70 (Recurrence) / 134 (No recurrence)                                      | rs2275913  | 6p12.2   | IL17A | A | G | 0.29 (1KG) | HR (AA/GG+AG)=2.097 | 1.118-3.933 | 0.021             |
| NMIBC Recurrence (TUR- and BCG-treated) | 2015 | Lima et al. [17]   | NMIBC after TUR+BCG | Not reported | European (Southern Portugal)  | 70 (Recurrence) / 134 (No recurrence)                                      | rs1799964  | 6p21.33  | TNFA  | C | T | 0.22 (1KG) | HR (CC/TT+TC)=2.427 | 1.144-5.149 | 0.021             |

|                                                      |      |                  |                                |                     |                                    |                                             |            |          |                            |   |   |                                                                |                                                                |                                                       |                         |
|------------------------------------------------------|------|------------------|--------------------------------|---------------------|------------------------------------|---------------------------------------------|------------|----------|----------------------------|---|---|----------------------------------------------------------------|----------------------------------------------------------------|-------------------------------------------------------|-------------------------|
| NMIBC<br>Recurrence<br>(TUR- and<br>BCG-<br>treated) | 2015 | Lima et al. [17] | NMIBC<br>after<br>TUR+BCG      | Not<br>reporte<br>d | European<br>(Southern<br>Portugal) | 70 (Recurrence) /<br>134 (No<br>recurrence) | rs13278062 | 8p21.3   | TRAILR1<br>(TNFRSF1<br>0A) | G | T | 0.6<br>(1KG)                                                   | HR (TG/TT)=3.546<br>HR (GG/TT)=3.078<br>HR<br>(TG+GG/TT)=3.195 | 1.477–<br>8.513<br>1.251–<br>7.573<br>1.373–<br>7.433 | 0.005<br>0.014<br>0.007 |
| NMIBC<br>Recurrence<br>(TUR- and<br>BCG-<br>treated) | 2015 | Ke et al. [37]   | NMIBC<br>(treated<br>with TUR) | UC                  | Caucasians<br>(European<br>decent) | 88 (Recurrence) /<br>45 (No<br>recurrence)  | rs3746162  | 19p13.3  | GPX4                       | A | G | 0.2<br>(Cases)<br>/ 0.21<br>(Contr<br>ols) /<br>0.16<br>(1KG)  | HR<br>(AA/AG+GG)=5.43                                          | 2.19–<br>13.46                                        | 0.0003                  |
| NMIBC<br>Recurrence<br>(TUR- and<br>BCG-<br>treated) | 2015 | Ke et al. [37]   | NMIBC<br>(TUR+BCG-<br>treated) | UC                  | Caucasians<br>(European<br>decent) | 110 (Recurrence)<br>/ 81 (No<br>recurrence) | rs7265992  | 20q11.22 | GSS                        | A | G | 0.60<br>(Cases)<br>/ 0.62<br>(Contr<br>ols) /<br>0.19<br>(1KG) | HR<br>(AA/AG+GG)=3.43                                          | 1.56–<br>7.56                                         | 0.002                   |
| NMIBC<br>Recurrence<br>(TUR- and<br>BCG-<br>treated) | 2015 | Ke et al. [37]   | NMIBC<br>(TUR+BCG-<br>treated) | UC                  | Caucasians<br>(European<br>decent) | 110 (Recurrence)<br>/ 81 (No<br>recurrence) | rs6060124  | 20q11.22 | GSS                        | A | C | 0.61<br>(Cases)<br>/ 0.69<br>(Contr<br>ols) /<br>0.26<br>(1KG) | HR<br>(AA/AG+GG)=2.80                                          | 1.44–<br>5.47                                         | 0.003                   |
| NMIBC<br>Recurrence<br>(TUR- and<br>BCG-<br>treated) | 2015 | Ke et al. [37]   | NMIBC<br>(TUR+BCG-<br>treated) | UC                  | Caucasians<br>(European<br>decent) | 110 (Recurrence)<br>/ 81 (No<br>recurrence) | rs7260770  | 20q11.22 | GSS                        | A | G | 0.63<br>(Cases)<br>/ 0.69<br>(Contr<br>ols) /<br>0.22<br>(1KG) | HR<br>(AA/AG+GG)=2.56                                          | 1.34–<br>4.90                                         | 0.005                   |

|                                         |      |                  |                                                  |              |                              |                                                                                                                    |           |          |       |   |   |                                             |                                                          |                                                                 |                                                 |
|-----------------------------------------|------|------------------|--------------------------------------------------|--------------|------------------------------|--------------------------------------------------------------------------------------------------------------------|-----------|----------|-------|---|---|---------------------------------------------|----------------------------------------------------------|-----------------------------------------------------------------|-------------------------------------------------|
| NMIBC Recurrence (TUR- and BCG-treated) | 2015 | Ke et al. [37]   | NMIBC (TUR+BCG-treated)                          | UC           | Caucasians (European decent) | 110 (Recurrence) / 81 (No recurrence)                                                                              | rs4911455 | 20q11.22 | GSS   | C | A | 0.62 (Cases) / 0.69 (Controls) / 0.28 (1KG) | HR (AA/AG+GG)=2.54                                       | 1.32–4.87                                                       | 0.005                                           |
| NMIBC Recurrence (BCG-treated)          | 2015 | Deng et al. [38] | NMIBC (treated with intravesicular chemotherapy) | Not reported | Chinese                      | 48 (Recurrence) / 76 (No recurrence) / 24 (Recurrence) / 60 (No recurrence) / 50 (recurrence) / 80 (No recurrence) | rs1695    | 11q13.2  | GSTP1 | G | A | 0.35 (1KG)                                  | HR (AG/AA)=3.29<br>HR (GG/AA)=5.18<br>HR (GG+AG/AA)=3.47 | 1.63–6.63 (AG/AA)<br>1.05–25.62 (GG/AA)<br>1.75–6.89 (GG+AG/AA) | 0.002 (log-rank)<br>0.001 (log-rank, for AG+GG) |
| NMIBC Recurrence (BCG-treated)          | 2015 | Deng et al. [38] | NMIBC (treated with intravesicular chemotherapy) | Not reported | Chinese                      | 35 (Recurrence) / 55 (No recurrence) / 60 (Recurrence) / 70 (No recurrence)                                        | rs4925    | 10q25.1  | GSTO1 | A | C | 0.1 (1KG)                                   | HR (AA/CC)=3.23<br>HR (AC+AA/CC)=1.96                    | 1.16–8.94 (AA/CC)<br>1.05–3.70 (AC+AA/CC)                       | 0.019 (log-rank)<br>0.042 (log-rank, for AC+AA) |
| Recurrence                              | 2016 | Wang et al. [39] | UBC (not reported whether NMIBC/UBC)             | Not reported | Chinese                      | 74 (Recurrence) / 125 (No recurrence)                                                                              | rs2042329 | 5q12.3   | CWC27 | T | G | 0.18 / 0.34 (1KG)                           | HR (T/G)=1.54                                            | 1.10–2.16                                                       | 0.012                                           |
| MIBC recurrence                         | 2018 | Li et al. [40]   | MIBC                                             | Not reported | Chinese                      | 42 (Recurrence) / 96 (No recurrence)                                                                               | rs4758680 | 12q24.31 | IL31  | A | C | 0.29 (1KG)                                  | HR (CA+AA/CC)=2.02                                       | 1.06–3.85                                                       | 0.03                                            |
| MIBC recurrence                         | 2018 | Li et al. [40]   | MIBC                                             | Not reported | Chinese                      | 42 (Recurrence) / 96 (No recurrence)                                                                               | rs4758680 | 12q24.31 | IL31  | A | C | 0.29 (1KG)                                  | HR (CA/CC)=1.90                                          | 1.15–3.16                                                       | 0.01                                            |

|                                |      |                      |                     |              |                                                                      |                                       |                        |          |               |    |    |                                             |                    |              |                       |
|--------------------------------|------|----------------------|---------------------|--------------|----------------------------------------------------------------------|---------------------------------------|------------------------|----------|---------------|----|----|---------------------------------------------|--------------------|--------------|-----------------------|
| NMIBC Recurrence (BCG-treated) | 2017 | Williams et al. [41] | NMIBC               | UC           | Northern American (although n restriction on ethnicity were applied) | 123 (Recurrence) / 82 (No recurrence) | rs3138056              | 14q13.2  | NFKBIA        | T? | C? | 0.32 (Reported in the study) / T=0.38 (1KG) | HR(TT/CC)=3.26     | 1.83-5.8     | 6.20x10 <sup>-5</sup> |
| NMIBC Recurrence (BCG-treated) | 2018 | Wang et al. [42]     | NMIBC (BCG-treated) | UC           | Chinese                                                              | 63 (Recurrence) / 127 (No recurrence) | rs1544410              | 12q13.11 | VDR           | A  | G  | 0.30 (1KG)                                  | HR (AA+AG/GG)=3.95 | Not reported | 0.037                 |
| NMIBC Recurrence               | 2013 | Yang et al. [43]     | NMIBC               | Not reported | Chinese                                                              | 45 (Recurrence) / 100 (No recurrence) | TSP-1-1223 (rs2169830) | 15q14    | TSP-1 (THBS1) | G  | A  | 0.42 (1KG)                                  | HR (GG/AA)=2.63    | 1.43-4.83    | 0.002                 |
| NMIBC Recurrence               | 2013 | Yang et al. [43]     | NMIBC               | Not reported | Chinese                                                              | 45 (Recurrence) / 100 (No recurrence) | TSP-1-1223 (rs2169830) | 15q14    | TSP-1 (THBS1) | G  | A  | 0.42 (1KG)                                  | HR (AG+GG/AA)=1.95 | 1.20-3.19    | 0.007                 |
| NMIBC Recurrence               | 2013 | Yang et al. [43]     | NMIBC               | Not reported | Chinese                                                              | 45 (Recurrence) / 100 (No recurrence) | TSP-1-1223 (rs2169830) | 15q14    | TSP-1 (THBS1) | G  | A  | 0.42 (1KG)                                  | HR (GG/AG+AA)=2.07 | 1.23-3.49    | 0.006                 |

282 BCG-Bacillus Calmette-Guérin; CI-confidence interval; CIS-carcinoma in situ; EA-effect allele; EAF-effect allele frequency; MIBC-muscle-invasive bladder cancer; NMIBC-  
283 non-muscle-invasive bladder cancer; OR-odds ratio; RA-reference allele; SNP-single nucleotide polymorphism; TUR-transurethral resection; UBC-urinary bladder cancer;  
284 UC-urothelial carcinoma; 1KG-1000 Genomes Project.

285

286

#### REFERENCES

287

288

1. Leibovici D, Grossman HB, Dinney CP, Millikan RE, Lerner S, Wang Y, Gu J, Dong Q, Wu X. Polymorphisms in inflammation genes and bladder cancer: from initiation to recurrence, progression, and survival. *Journal of clinical oncology : official journal of the American Society of Clinical Oncology*. 2005;23(24):5746-56.

291

2. Zhao H, Liang D, Grossman HB, Wu X. Glutathione peroxidase 1 gene polymorphism and risk of recurrence in patients with superficial bladder cancer. *Urology*. 2005;66(4):769-74.

292

3. Lin J, Dinney CP, Grossman HB, Jhamb M, Zhu Y, Spitz MR, Wu X. E-cadherin promoter polymorphism (C-160A) and risk of recurrence in patients with superficial bladder cancer. *Clinical genetics*. 2006;70(3):240-5.

294

- 295 4. Ahirwar D, Kesarwani P, Manchanda PK, Mandhani A, Mittal RD. Anti- and proinflammatory cytokine gene polymorphism and genetic  
296 predisposition: association with smoking, tumor stage and grade, and bacillus Calmette-Guerin immunotherapy in bladder cancer. *Cancer*  
297 *genetics and cytogenetics*. 2008;184(1):1-8.
- 298 5. Horikawa Y, Nadaoka J, Saito M, Kumazawa T, Inoue T, Yuasa T, Tsuchiya N, Nishiyama H, Ogawa O, Habuchi T. Clinical implications of  
299 the MDM2 SNP309 and p53 Arg72Pro polymorphisms in transitional cell carcinoma of the bladder. *Oncology reports*. 2008;20(1):49-55.
- 300 6. Ahirwar DK, Mandhani A, Dharaskar A, Kesarwani P, Mittal RD. Association of tumour necrosis factor-alpha gene (T-1031C, C-863A, and  
301 C-857T) polymorphisms with bladder cancer susceptibility and outcome after bacille Calmette-Guerin immunotherapy. *BJU international*.  
302 2009;104(6):867-73.
- 303 7. Gangwar R, Mandhani A, Mittal RD. Caspase 9 and caspase 8 gene polymorphisms and susceptibility to bladder cancer in north Indian  
304 population. *Annals of surgical oncology*. 2009;16(7):2028-34.
- 305 8. Gangwar R, Ahirwar D, Mandhani A, Mittal RD. Do DNA repair genes OGG1, XRCC3 and XRCC7 have an impact on susceptibility to  
306 bladder cancer in the North Indian population? *Mutation research*. 2009;680(1-2):56-63.
- 307 9. Gangwar R, Mittal RD. Association of selected variants in genes involved in cell cycle and apoptosis with bladder cancer risk in North  
308 Indian population. *DNA and cell biology*. 2010;29(7):349-56.
- 309 10. Ahirwar DK, Mandhani A, Mittal RD. IL-8 -251 T > A polymorphism is associated with bladder cancer susceptibility and outcome after  
310 BCG immunotherapy in a northern Indian cohort. *Archives of medical research*. 2010;41(2):97-103.
- 311 11. Jaiswal PK, Goel A, Mandhani A, Mittal RD. Functional polymorphisms in promoter survivin gene and its association with susceptibility  
312 to bladder cancer in North Indian cohort. *Molecular biology reports*. 2012;39(5):5615-21.
- 313 12. Wei H, Kamat A, Chen M, Ke HL, Chang DW, Yin J, Grossman HB, Dinney CP, Wu X. Association of polymorphisms in oxidative stress  
314 genes with clinical outcomes for bladder cancer treated with Bacillus Calmette-Guerin. *PLoS ONE*. 2012;7(6):e38533.
- 315 13. Wang M, Chu H, Li P, Yuan L, Fu G, Ma L, Shi D, Zhong D, Tong N, Qin C, Yin C, Zhang Z. Genetic variants in miRNAs predict bladder  
316 cancer risk and recurrence. *Cancer research*. 2012;72(23):6173-82.
- 317 14. Ke HL, Chen M, Ye Y, Hildebrandt MA, Wu WJ, Wei H, Huang M, Chang DW, Dinney CP, Wu X. Genetic variations in micro-RNA  
318 biogenesis genes and clinical outcomes in non-muscle-invasive bladder cancer. *Carcinogenesis*. 2013;34(5):1006-11.
- 319 15. Lee EK, Ye Y, Kamat AM, Wu X. Genetic variations in regulator of G-protein signaling (RGS) confer risk of bladder cancer. *Cancer*.  
320 2013;119(9):1643-51.
- 321 16. Zhang K, Zhou B, Zhang P, Zhang Z, Chen P, Pu Y, Song Y, Zhang L. Genetic variants in NAMPT predict bladder cancer risk and prognosis  
322 in individuals from southwest Chinese Han group. *Tumour biology : the journal of the International Society for Oncodevelopmental Biology and*  
323 *Medicine*. 2014;35(5):4031-40.

- 324 17. Lima L, Oliveira D, Ferreira JA, Tavares A, Cruz R, Medeiros R, Santos L. The role of functional polymorphisms in immune response genes  
325 as biomarkers of bacille Calmette-Guerin (BCG) immunotherapy outcome in bladder cancer: establishment of a predictive profile in a Southern  
326 Europe population. *BJU international*. 2015;116(5):753-63.
- 327 18. Deng X, Zhang X, Cheng Y, Yang X, Zhao R, Liu X, Li X, Qin C, Lu Q, Yin C. XRCC1 polymorphisms associated with survival among Chinese  
328 bladder cancer patients receiving epirubicin and mitomycin C. *Tumour biology : the journal of the International Society for Oncodevelopmental  
329 Biology and Medicine*. 2015;36(6):4591-6.
- 330 19. Ryk C, Koskela LR, Thiel T, Wiklund NP, Steineck G, Schumacher MC, de Verdier PJ. Outcome after BCG treatment for urinary bladder  
331 cancer may be influenced by polymorphisms in the NOS2 and NOS3 genes. *Redox biology*. 2015;6:272-7.
- 332 20. Xie L, Sun Y, Chen T, Tian D, Li Y, Zhang Y, Ding N, Shen Z, Xu H, Nian X, Sha N, Han R, Hu H, Wu C. Association between MDM2 SNP309  
333 T>G polymorphism and the risk of bladder cancer: new data in a Chinese population and an updated meta-analysis. *OncoTargets and therapy*.  
334 2015;8:3679-90.
- 335 21. Li P, Zhang X, Deng X, Tao J, Qin C, Yang X, Cheng Y, Lu Q, Wang Z, Yin C. Pharmacogenetic association between XRCC1 polymorphisms  
336 and improved outcomes in bladder cancer patients following intravesical instillation of epirubicin. *International journal of clinical and  
337 experimental medicine*. 2015;8(7):11167-73.
- 338 22. Kim EJ, Jeong P, Quan C, Kim J, Bae SC, Yoon SJ, Kang JW, Lee SC, Jun Wee J, Kim WJ. Genotypes of TNF-alpha, VEGF, hOGG1, GSTM1,  
339 and GSTT1: useful determinants for clinical outcome of bladder cancer. *Urology*. 2005;65(1):70-5.
- 340 23. Gu J, Zhao H, Dinney CP, Zhu Y, Leibovici D, Bermejo CE, Grossman HB, Wu X. Nucleotide excision repair gene polymorphisms and  
341 recurrence after treatment for superficial bladder cancer. *Clinical cancer research : an official journal of the American Association for Cancer  
342 Research*. 2005;11(4):1408-15.
- 343 24. Decobert M, Larue H, Bergeron A, Harel F, Pfister C, Rousseau F, Lacombe L, Fradet Y. Polymorphisms of the human NRAMP1 gene are  
344 associated with response to bacillus Calmette-Guerin immunotherapy for superficial bladder cancer. *The Journal of urology*. 2006;175(4):1506-  
345 11.
- 346 25. Mittal RD, Singh R, Manchanda PK, Ahirwar D, Gangwar R, Kesarwani P, Mandhani A. XRCC1 codon 399 mutant allele: a risk factor for  
347 recurrence of urothelial bladder carcinoma in patients on BCG immunotherapy. *Cancer biology & therapy*. 2008;7(5):645-50.
- 348 26. Gangawar R, Ahirwar D, Mandhani A, Mittal RD. Impact of nucleotide excision repair ERCC2 and base excision repair APEX1 genes  
349 polymorphism and its association with recurrence after adjuvant BCG immunotherapy in bladder cancer patients of North India. *Medical  
350 oncology (Northwood, London, England)*. 2010;27(2):159-66.
- 351 27. Ahirwar DK, Agrahari A, Mandhani A, Mittal RD. Cytokine gene polymorphisms are associated with risk of urinary bladder cancer and  
352 recurrence after BCG immunotherapy. *Biomarkers : biochemical indicators of exposure, response, and susceptibility to chemicals*.  
353 2009;14(4):213-8.

- 354 28. Gangwar R, Mandhani A, Mittal RD. XPC gene variants: a risk factor for recurrence of urothelial bladder carcinoma in patients on BCG  
355 immunotherapy. *Journal of cancer research and clinical oncology*. 2010;136(5):779-86.
- 356 29. Wang M, Wang M, Yuan L, Wu D, Zhang Z, Yin C, Fu G, Wei Q, Zhang Z. A novel XPF -357A>C polymorphism predicts risk and recurrence  
357 of bladder cancer. *Oncogene*. 2010;29(13):1920-8.
- 358 30. Kiemeny LA, Sulem P, Besenbacher S, Vermeulen SH, Sigurdsson A, Thorleifsson G, Gudbjartsson DF, Stacey SN, Gudmundsson J,  
359 Zanon C, Kostic J, Masson G, Bjarnason H, Palsson ST, Skarphedinsson OB, Gudjonsson SA, Witjes JA, Grotenhuis AJ, Verhaegh GW, Bishop DT,  
360 Sak SC, Choudhury A, Elliott F, Barrett JH, Hurst CD, de Verdier PJ, Ryk C, Rudnai P, Gurzau E, Koppova K, Vineis P, Polidoro S, Guarrera S,  
361 Sacerdote C, Campagna M, Placidi D, Arici C, Zeegers MP, Kellen E, Gutierrez BS, Sanz-Velez JI, Sanchez-Zalabardo M, Valdivia G, Garcia-Prats  
362 MD, Hengstler JG, Blaszkewicz M, Dietrich H, Ophoff RA, van den Berg LH, Alexiusdottir K, Kristjansson K, Geirsson G, Nikulasson S, Petursdottir  
363 V, Kong A, Thorgeirsson T, Mungan NA, Lindblom A, van Es MA, Porru S, Buntinx F, Golka K, Mayordomo JI, Kumar R, Matullo G, Steineck G,  
364 Kiltie AE, Aben KKH, Jonsson E, Thorsteinsdottir U, Knowles MA, Rafnar T, Stefansson K. A sequence variant at 4p16.3 confers susceptibility to  
365 urinary bladder cancer. *Nature genetics*. 2010;42(5):415-9.
- 366 31. Chen M, Hildebrandt MA, Clague J, Kamat AM, Picornell A, Chang J, Zhang X, Izzo J, Yang H, Lin J, Gu J, Chanock S, Kogevinas M,  
367 Rothman N, Silverman DT, Garcia-Closas M, Grossman HB, Dinney CP, Malats N, Wu X. Genetic variations in the sonic hedgehog pathway affect  
368 clinical outcomes in non-muscle-invasive bladder cancer. *Cancer prevention research (Philadelphia, Pa)*. 2010;3(10):1235-45.
- 369 32. Chiong E, Kesavan A, Mahendran R, Chan YH, Sng JH, Lim YK, Kamaraj R, Tan TM, Esuvaranathan K. NRAMP1 and hGPX1 gene  
370 polymorphism and response to bacillus Calmette-Guerin therapy for bladder cancer. *European urology*. 2011;59(3):430-7.
- 371 33. Srivastava P, Kapoor R, Mittal RD. Association of single nucleotide polymorphisms in promoter of matrix metalloproteinase-2, 8 genes  
372 with bladder cancer risk in Northern India. *Urologic oncology*. 2013;31(2):247-54.
- 373 34. Jaiswal PK, Singh V, Srivastava P, Mittal RD. Association of IL-12, IL-18 variants and serum IL-18 with bladder cancer susceptibility in  
374 North Indian population. *Gene*. 2013;519(1):128-34.
- 375 35. Andrew AS, Gui J, Hu T, Wyszynski A, Marsit CJ, Kelsey KT, Schned AR, Tanyos SA, Pendleton EM, Ekstrom RM, Li Z, Zens MS, Borsuk M,  
376 Moore JH, Karagas MR. Genetic polymorphisms modify bladder cancer recurrence and survival in a USA population-based prognostic study.  
377 *BJU international*. 2015;115(2):238-47.
- 378 36. Zhou B, Zhang P, Tang T, Zhang K, Wang Y, Song Y, Liao H, Zhang L. Prognostic value of PDCD6 polymorphisms and the susceptibility to  
379 bladder cancer. *Tumour biology : the journal of the International Society for Oncodevelopmental Biology and Medicine*. 2014;35(8):7547-54.
- 380 37. Ke HL, Lin J, Ye Y, Wu WJ, Lin HH, Wei H, Huang M, Chang DW, Dinney CP, Wu X. Genetic Variations in Glutathione Pathway Genes  
381 Predict Cancer Recurrence in Patients Treated with Transurethral Resection and Bacillus Calmette-Guerin Instillation for Non-muscle Invasive  
382 Bladder Cancer. *Annals of surgical oncology*. 2015;22(12):4104-10.

- 383 38. Deng X, Yang X, Cheng Y, Liu X, Li X, Zhao R, Qin C, Lu Q, Yin C. GSTP1 and GSTO1 single nucleotide polymorphisms and the response of  
384 bladder cancer patients to intravesical chemotherapy. *Scientific reports*. 2015;5:14000.
- 385 39. Wang M, Li Z, Chu H, Lv Q, Ye D, Ding Q, Xu C, Guo J, Du M, Chen J, Song Z, Yin C, Qin C, Gu C, Zhu Y, Xia G, Liu F, Zhang Z, Yuan L, Fu G,  
386 Hu Z, Tong N, Shen J, Liu K, Sun J, Sun Y, Li J, Li X, Shen H, Xu J, Shi Y, Zhang Z. Genome-Wide Association Study of Bladder Cancer in a Chinese  
387 Cohort Reveals a New Susceptibility Locus at 5q12.3. *Cancer research*. 2016;76(11):3277-84.
- 388 40. Li Q, Tang T, Zhang P, Liu C, Pu Y, Zhang Y, Song H, Wang Y, Song Y, Su M, Zhou B, Zhang L. Correlation of IL-31 gene polymorphisms  
389 with susceptibility and clinical recurrence of bladder cancer. *Familial cancer*. 2018;17(4):577-85.
- 390 41. Williams SB, Kamat AM, Mmeje C, Ye Y, Huang M, Chang DW, Dinney CP, Wu X. Genetic variants in the inflammation pathway as  
391 predictors of recurrence and progression in non-muscle invasive bladder cancer treated with Bacillus Calmette-Guerin. *Oncotarget*.  
392 2017;8(51):88782-91.
- 393 42. Wang Z, Lim YK, Lim HCC, Chan YH, Ngiam N, Raman Nee Mani L, Esuvaranathan K, Ng CF, Teoh J, Chan E, Mahendran R, Chiong E. The  
394 Role of Vitamin D Receptor Polymorphisms in Predicting the Response to Therapy for Nonmuscle Invasive Bladder Carcinoma. *The Journal of*  
395 *urology*. 2018;200(4):737-42.
- 396 43. Yang X, Li P, Yang X, Qin C, Cao Q, Zhang Z, Wang M, Cai H, Gu J, Tao J, Gu M, Lu Q, Yin C. TSP-1-1223 A/G Polymorphism as a Potential  
397 Predictor of the Recurrence Risk of Bladder Cancer in a Chinese Population. *International Journal of Genomics*. 2013;2013:9.  
398



399 Supplementary Table 8. Summary associations for previously reported SNPs on urinary bladder cancer progression.

| Outcome                                                                | Year | Study             | Patient subgroup | Cancer subtype | Ethnic background             | Sample size (Cases/Controls)            | SNP               | Locus   | Gene  | EA | RA | EAF        | Effect Size       | 95% CI      | p value |
|------------------------------------------------------------------------|------|-------------------|------------------|----------------|-------------------------------|-----------------------------------------|-------------------|---------|-------|----|----|------------|-------------------|-------------|---------|
| <b>Associations reducing the risk of bladder cancer progression:</b>   |      |                   |                  |                |                               |                                         |                   |         |       |    |    |            |                   |             |         |
| NMIBC Progression (increase in stage)                                  | 2007 | Sanyal et al. [1] | UBC              | Not reported   | European (Sweden)             | 94 (TC+CC) / 102 (TT)                   | H27H (rs17350793) | 11p15.5 | HRAS  | C  | T  | 0.30 (1KG) | HR (TC+CC/TT)=0.3 | 0.1-0.9     | 0.03    |
| UBC Progression (increase in stage)                                    | 2011 | Ryk et al. [2]    | UBC              | Not reported   | European (Sweden)             | 67 (Progression) / 215 (No progression) | rs2297518         | 17q11.2 | NOS2  | T  | C  | 0.17 (1KG) | HR (TT/CC)=0.21   | 0.05-0.87   | 0.031   |
| NMIBC Progression (transition from NMIBC to MIBC or metastatic cancer) | 2013 | Lee et al. [3]    | NMIBC            | UC             | Caucasian (Northern American) | 85 (Progression) / 336 (No progression) | rs10917690        | 1q23.3  | RGS5  | G  | A  | 0.29 (1KG) | HR (G/A)=0.58     | (0.39-0.86) | 0.0065  |
| NMIBC Progression (transition from NMIBC to MIBC or metastatic cancer) | 2013 | Lee et al. [3]    | NMIBC            | UC             | Caucasian (Northern American) | 85 (Progression) / 336 (No progression) | rs4075958         | 5q35.3  | RGS14 | A  | G  | 0.18 (1KG) | HR (A/G)=0.65     | 0.44-0.97   | 0.0332  |

|                                                                                                                        |      |                |                                                                                               |    |                               |                                                |            |        |      |                       |   |            |                                             |           |        |
|------------------------------------------------------------------------------------------------------------------------|------|----------------|-----------------------------------------------------------------------------------------------|----|-------------------------------|------------------------------------------------|------------|--------|------|-----------------------|---|------------|---------------------------------------------|-----------|--------|
| NMIBC Progression (transition from NMIBC to MIBC or metastatic cancer)                                                 | 2013 | Lee et al. [3] | NMIBC                                                                                         | UC | Caucasian (Northern American) | 85 (Progression) / 336 (No progression)        | rs10926466 | 1q23.1 | RGS7 | T                     | C | 0.63 (1KG) | HR (TC/CC)=0.60                             | 0.36-0.98 | 0.0414 |
| NMIBC Progression (transition from NMIBC to MIBC or metastatic cancer)                                                 | 2013 | Lee et al. [3] | NMIBC                                                                                         | UC | Caucasian (Northern American) | 85 (Progression) / 336 (No progression)        | rs12038803 | 1q23.1 | RGS7 | C/G/T? (Not reported) | A | 0.66 (1KG) | HR (?A/AA)=0.60                             | 0.36-0.98 | 0.0431 |
| High-risk NMIBC Progression (BCG-treated) (transition from NMIBC to MIBC, metastatic cancer, or cancer-specific death) | 2015 | Ryk et al. [4] | High-risk (either TaG3, T1, TaG1+conCIS, TaG2+conCIS or primary CIS) NMIBC (treated with BCG) | UC | European (Sweden)             | 1 (TT, BCG-treated) / 11 (TT, not BCG-treated) | rs2070744  | 7q36.1 | NOS3 | T                     | C | 0.77 (1KG) | HR (BCG-treated TT/Not BCG-treated TT)=0.05 | 0.01-0.42 | 0.005  |

|                                                                                                                        |      |                    |                                                                                               |              |                   |                                               |                    |        |         |   |   |                                |                                             |           |       |
|------------------------------------------------------------------------------------------------------------------------|------|--------------------|-----------------------------------------------------------------------------------------------|--------------|-------------------|-----------------------------------------------|--------------------|--------|---------|---|---|--------------------------------|---------------------------------------------|-----------|-------|
| High-risk NMIBC Progression (BCG-treated) (transition from NMIBC to MIBC, metastatic cancer, or cancer-specific death) | 2015 | Ryk et al. [4]     | High-risk (either TaG3, T1, TaG1+conCIS, TaG2+conCIS or primary CIS) NMIBC (treated with BCG) | UC           | European (Sweden) | 3 (GG, BCG-treated) / 9 (GG, not BCG-treated) | rs1799983          | 7q36.1 | NOS3    | G | T | 0.82 (1KG)                     | HR (BCG-treated GG/Not BCG-treated GG)=0.10 | 0.02-0.46 | 0.003 |
| UBC Progression (metastases present)                                                                                   | 2015 | Deng et al. [5]    | UBC                                                                                           | Not reported | Chinese           | 132 (metastasis) / 27 (no metastasis)         | rs2910164          | 5q33.3 | MIR146A | G | C | 0.39 (all UBC) / 0.32 (TOPMED) | OR=0.45 (log-additive model)                | 0.21-0.93 | 0.025 |
| <b>Associations reducing the risk of bladder cancer progression:</b>                                                   |      |                    |                                                                                               |              |                   |                                               |                    |        |         |   |   |                                |                                             |           |       |
| NMIBC Progression (increase in stage)                                                                                  | 2003 | Sakano et al. [6]  | UBC                                                                                           | UC           | European (Sweden) | 33 (CT+TT) / 178 (CC)                         | 540C>T (rs3088440) | 9p21   | CDKN2A  | T | C | 0.08 / 0.17 (1KG)              | HR (CT+TT/CC)=2.5                           | 1.0-6.1   | 0.043 |
| NMIBC progression (BCG-treated) (increase in stage)                                                                    | 2006 | Basturk et al. [7] | [7]NMIBC (BCG-treated)                                                                        | UC           | Turkish           | 59 (Progression) / 14 (No progression)        | 1082 (rs1800896)   | 1q32.1 | IL10    | G | A | 0.27 (1KG)                     | OR (GG)=5.47                                | 0.84-38.3 | 0.05  |
| NMIBC progression (BCG-treated) (increase in stage)                                                                    | 2006 | Basturk et al. [7] | NMIBC (BCG-treated)                                                                           | UC           | Turkish           | 59 (Progression) / 14 (No progression)        | 1098 (rs2243248)   | 5q31.1 | IL4     | G | T | 0.11 (1KG)                     | OR (GG)=18.33                               | 0.8-412.2 | 0.05  |

|                                                                                      |      |                    |                     |              |                               |                                         |                       |          |       |   |   |            |                                    |                        |                |
|--------------------------------------------------------------------------------------|------|--------------------|---------------------|--------------|-------------------------------|-----------------------------------------|-----------------------|----------|-------|---|---|------------|------------------------------------|------------------------|----------------|
| NMIBC progression (BCG-treated) (increase in stage)                                  | 2006 | Basturk et al. [7] | NMIBC (BCG-treated) | UC           | Turkish                       | 59 (Progression) / 14 (No progression)  | Codon 10T (rs1800470) | 19q13.2  | TGFB1 | T | C | 0.55 (1KG) | OR (T)=7.5                         | 1.33-55.1              | 0.006          |
| NMIBC progression (BCG-treated) (increase in stage)                                  | 2006 | Basturk et al. [7] | NMIBC (BCG-treated) | UC           | Turkish                       | 59 (Progression) / 14 (No progression)  | Codon 25G (rs1800471) | 19q13.2  | TGFB1 | G | C | 0.05 (1KG) | OR (G)=7.17                        | 0.83-160.2             | 0.04           |
| Progression (metastases present)                                                     | 2012 | Guirado et al. [8] | UBC                 | UC           | European (Spain)              | 92 (Yes) / 136 (No)                     | rs9302752             | 16q12.1  | NOD2  | G | A | 0.50 (1KG) | OR (GG/AG+AA)=3.23 OR (GG/AG)=3.16 | 1.25-8.33<br>1.12-8.33 | 0.011<br>0.022 |
| NMIBC Progression (BCG-treated) (transition from NMIBC to MIBC or metastatic cancer) | 2012 | Wei et al. [9]     | NMIBC               | UC           | Caucasian (Northern American) | 75 (Progression) / 327 (No progression) | rs3890995             | 12q24.11 | UNG   | C | T | 0.22 (1KG) | HR (CC+CT/TT)=1.92                 | 1.33-2.77              | 0.0005         |
| NMIBC Progression (TUR-treated) (transition from NMIBC to MIBC or metastatic cancer) | 2013 | Ke et al. [10]     | NMIBC               | Not reported | Caucasian (Northern American) | 75 (Progression) / 324 (No progression) | rs720012              | 22q11.21 | DGCR8 | A | G | 0.22 (1KG) | HR (AA/AG+GG)=3.97                 | 1.52-10.36             | 0.005          |

|                                                                                      |      |                |       |              |                               |                                         |           |          |       |   |   |            |                    |            |        |
|--------------------------------------------------------------------------------------|------|----------------|-------|--------------|-------------------------------|-----------------------------------------|-----------|----------|-------|---|---|------------|--------------------|------------|--------|
| NMIBC Progression (TUR-treated) (transition from NMIBC to MIBC or metastatic cancer) | 2013 | Ke et al. [10] | NMIBC | Not reported | Caucasian (Northern American) | 75 (Progression) / 326 (No progression) | rs2073778 | 22q11.21 | DGCR8 | T | C | 0.22 (1KG) | HR (TT/CT+CC=4.00) | 1.53–10.46 | 0.005  |
| NMIBC Progression (transition from NMIBC to MIBC or metastatic cancer)               | 2013 | Lee et al. [3] | NMIBC | UC           | Caucasian (Northern American) | 85 (Progression) / 336 (No progression) | rs1323291 | 1q31.2   | RGS1  | C | A | 0.15 (1KG) | HR (CA/AA)=2.14    | 1.25–3.66  | 0.0059 |
| NMIBC Progression (transition from NMIBC to MIBC or metastatic cancer)               | 2013 | Lee et al. [3] | NMIBC | UC           | Caucasian (Northern American) | 85 (Progression) / 336 (No progression) | rs6678136 | 1q23.3   | RGS4  | A | G | 0.46 (1KG) | HR (AG/GG)=2.07    | 1.20–3.57  | 0.0094 |

|                                                                                              |      |                  |                                                        |              |                               |                                                          |                     |          |         |   |   |                                |                       |           |       |
|----------------------------------------------------------------------------------------------|------|------------------|--------------------------------------------------------|--------------|-------------------------------|----------------------------------------------------------|---------------------|----------|---------|---|---|--------------------------------|-----------------------|-----------|-------|
| NMIBC Progression (transition from NMIBC to MIBC or metastatic cancer)                       | 2013 | Lee et al. [3]   | NMIBC                                                  | UC           | Caucasian (Northern American) | 85 (Progression) / 336 (No progression)                  | rs11585883          | 1q23.3   | RGS5    | C | T | 0.03 (1KG)                     | HR (CT/TT)=1.93       | 1.12-3.32 | 0.018 |
| UBC Progression (metastases present)                                                         | 2015 | Deng et al. [5]  | UBC                                                    | Not reported | Chinese                       | 132 (metastasis) / 27 (no metastasis)                    | rs2910164           | 5q33.3   | MIR146A | G | C | 0.39 (all UBC) / 0.32 (TOPMED) | OR (CG+GG / CC)= 2.63 | 1.03-6.67 | 0.04  |
| MIBC Progression (confirmed disease relapse)                                                 | 2016 | Xu et al. [11]   | Stage 4 UBC (treated with platinum-based chemotherapy) | UC           | Chinese                       | 41 (Overall; death and progression counts not reported)  | C118T (rs11615)     | 19q13.32 | ERCC1   | T | C | 0.27 / 0.33 (1KG)              | HR (CC/CT+TT)=1.83    | 1.12-2.99 | 0.016 |
| UBC Progression (transition from NMIBC to MIBC, metastatic cancer, or cancer-specific death) | 2017 | Hess et al. [12] | UBC                                                    | UC           | European (Germany)            | 179 (Overall, death and progression counts not reported) | rs1801018 (c.21G>A) | 18q21.33 | BCL2    | A | G | 0.53 / 0.76 (1KG)              | HR (AA/GG)=3.08       | 1.16-8.16 | 0.024 |

400 BCG-Bacillus Calmette-Guérin; CI-confidence interval; CIS-carcinoma in situ; EA-effect allele; EAF-effect allele frequency; MIBC-muscle-invasive bladder cancer; NMIBC-  
401 non-muscle-invasive bladder cancer; OR-odds ratio; RA-reference allele; SNP-single nucleotide polymorphism; TUR-transurethral resection; UBC-urinary bladder cancer;  
402 UC-urothelial carcinoma; 1KG-1000 Genomes Project.  
403

404  
405  
406  
407  
408  
409  
410  
411  
412  
413  
414  
415  
416  
417  
418  
419  
420  
421  
422  
423  
424  
425  
426  
427  
428  
429  
430

## REFERENCES

1. Sanyal S, De Verdier PJ, Steineck G, Larsson P, Onelov E, Hemminki K, Kumar R. Polymorphisms in XPD, XPC and the risk of death in patients with urinary bladder neoplasms. *Acta oncologica (Stockholm, Sweden)*. 2007;46(1):31-41.
2. Ryk C, Wiklund NP, Nyberg T, De Verdier PJ. Ser608Leu polymorphisms in the nitric oxide synthase-2 gene may influence urinary bladder cancer pathogenesis. *Scandinavian journal of urology and nephrology*. 2011;45(5):319-25.
3. Lee EK, Ye Y, Kamat AM, Wu X. Genetic variations in regulator of G-protein signaling (RGS) confer risk of bladder cancer. *Cancer*. 2013;119(9):1643-51.
4. Ryk C, Koskela LR, Thiel T, Wiklund NP, Steineck G, Schumacher MC, de Verdier PJ. Outcome after BCG treatment for urinary bladder cancer may be influenced by polymorphisms in the NOS2 and NOS3 genes. *Redox biology*. 2015;6:272-7.
5. Deng S, Wang W, Li X, Zhang P. Common genetic polymorphisms in pre-microRNAs and risk of bladder cancer. *World journal of surgical oncology*. 2015;13:297.
6. Sakano S, Berggren P, Kumar R, Steineck G, Adolfsson J, Onelov E, Hemminki K, Larsson P. Clinical course of bladder neoplasms and single nucleotide polymorphisms in the CDKN2A gene. *International journal of cancer*. 2003;104(1):98-103.
7. Basturk B, Yavascaoglu I, Oral B, Goral G, Oktay B. Cytokine gene polymorphisms can alter the effect of Bacillus Calmette-Guerin (BCG) immunotherapy. *Cytokine*. 2006;35(1-2):1-5.
8. Guirado M, Gil H, Saenz-Lopez P, Reinboth J, Garrido F, Cozar JM, Ruiz-Cabello F, Carretero R. Association between C13ORF31, NOD2, RIPK2 and TLR10 polymorphisms and urothelial bladder cancer. *Human immunology*. 2012;73(6):668-72.
9. Wei H, Kamat A, Chen M, Ke HL, Chang DW, Yin J, Grossman HB, Dinney CP, Wu X. Association of polymorphisms in oxidative stress genes with clinical outcomes for bladder cancer treated with Bacillus Calmette-Guerin. *PLoS ONE*. 2012;7(6):e38533.
10. Ke HL, Chen M, Ye Y, Hildebrandt MA, Wu WJ, Wei H, Huang M, Chang DW, Dinney CP, Wu X. Genetic variations in micro-RNA biogenesis genes and clinical outcomes in non-muscle-invasive bladder cancer. *Carcinogenesis*. 2013;34(5):1006-11.
11. Xu ZC, Cai HZ, Li X, Xu WZ, Xu T, Yu B, Zou Q, Xu L. ERCC1 C118T polymorphism has predictive value for platinum-based chemotherapy in patients with late-stage bladder cancer. *Genetics and molecular research : GMR*. 2016;15(2).
12. Hess J, Stelmach P, Eisenhardt A, Rubben H, Reis H, Schmid KW, Bachmann HS. Impact of BCL2 polymorphisms on survival in transitional cell carcinoma of the bladder. *Journal of cancer research and clinical oncology*. 2017;143(9):1659-70.

431 Supplementary Table 9. Summary associations for previously reported SNPs on overall and cancer-specific survival for urinary bladder cancer.

| Outcome                                                          | Year | Study                | Patient subgroup                                                                         | Cancer subtype | Ethnic background         | Sample size (Cases/Controls)                  | SNP                | Locus   | Gene  | EA | RA | EAF        | Effect Size                                 | 95% CI       | p value |
|------------------------------------------------------------------|------|----------------------|------------------------------------------------------------------------------------------|----------------|---------------------------|-----------------------------------------------|--------------------|---------|-------|----|----|------------|---------------------------------------------|--------------|---------|
| <b>Associations for cancer-specific death:</b>                   |      |                      |                                                                                          |                |                           |                                               |                    |         |       |    |    |            |                                             |              |         |
| <b>Associations reducing the risk of cancer-specific death:</b>  |      |                      |                                                                                          |                |                           |                                               |                    |         |       |    |    |            |                                             |              |         |
| High-risk NMIBC Cancer-specific death (BCG-treated)              | 2015 | Ryk et al. [1]       | High-risk (either TaG3, T1, TaG1+conCIS, TaG2+conCIS or primary CIS) NMIBC (BCG-treated) | UC             | European (Sweden)         | 2 (GG, BCG-treated) / 6 (GG, not BCG-treated) | rs1799983          | 7q36.1  | NOS3  | G  | T  | 0.82 (1KG) | HR (BCG-treated GG/Not BCG-treated GG)=0.16 | 0.03–0.84    | 0.030   |
| MIBC Cancer-specific death                                       | 2005 | Leibovici et al. [2] | MIBC                                                                                     | Not reported   | Caucasian (White)         | 105 (CG+CC) / 44 (GG)                         | 174G/C (rs1800795) | 7p15.3  | IL6   | C  | G  | 0.14 (1KG) | HR (CG+CC/CC)=0.39                          | 0.15–1.00    | <0.05   |
| MIBC Cancer-specific death (Radiotherapy-treated)                | 2012 | Teo et al. [3]       | MIBC (Radiotherapy-treated)                                                              | Not reported   | European (United Kingdom) | 139 (AG+GG) / 50 (AA)                         | rs7180135          | 15q15.1 | RAD51 | G  | A  | 0.27 (1KG) | HR (AG+GG/AA)=0.52                          | 0.31–0.87    | 0.01    |
| UBC Cancer-specific death                                        | 2009 | Shinohara et al. [4] | UBC                                                                                      | UC + Other     | Japanese                  | 77 (GT+GG) / 18 (TT)                          | SNP309 (rs2279744) | 12q15   | MDM2  | G  | T  | 0.37 (1KG) | RR (GT+GG/TT)=0.57                          | 0.36–0.95    | 0.031   |
| UBC Cancer-specific death                                        | 2012 | Guirado et al. [5]   | UBC                                                                                      | UC             | European (Spain)          | Not reported                                  | rs4129009          | 4p14    | TLR10 | T  | C  | 0.85 (1KG) | HR (TT/CT+CC)=0.49                          | Not reported | 0.022   |
| UBC Cancer-specific death                                        | 2007 | Sanyal et al. [6]    | UBC                                                                                      | Not reported   | European (Sweden)         | 68 (Dead) / 198 (Alive)                       | A222V (rs1801133)  | 1p36.22 | MTHFR | T  | C  | 0.25 (1KG) | HR (CT+TT/CC)=0.5                           | 0.3–0.9      | 0.03    |
| <b>Associations increasing the risk of cancer-specific death</b> |      |                      |                                                                                          |                |                           |                                               |                    |         |       |    |    |            |                                             |              |         |



|                                                         |      |                        |                             |              |                               |                                                                   |                      |          |        |   |   |                   |                                    |                        |                        |
|---------------------------------------------------------|------|------------------------|-----------------------------|--------------|-------------------------------|-------------------------------------------------------------------|----------------------|----------|--------|---|---|-------------------|------------------------------------|------------------------|------------------------|
| MIBC Cancer-specific death                              | 2009 | Castillejo et al. [7]  | MIBC                        | UC           | European (Spain)              | 35 (GT) / 54 (GG)<br>5 (TT) / 54 (GG)                             | rs334358             | 9q22.33  | TGFBR1 | T | G | 0.12 (1KG)        | HR (GT/GG)=1.67<br>HR (TT/GG)=2.83 | 1.05-2.68<br>1.09-7.34 | p-trend=0.009          |
| MIBC Cancer-specific death                              | 2009 | Castillejo et al. [7]  | MIBC                        | UC           | European (Spain)              | 35 (AG) / 52 (AA)<br>5 (GG) / 52 (AA)                             | rs868                | 9q22.33  | TGFBR1 | G | A | 0.12 (1KG)        | HR (AG/AA)=1.85<br>HR (GG/AA)=3.00 | 1.15-2.97<br>1.15-7.82 | p-trend=0.003          |
| MIBC Cancer-specific death (Cystectomy-treated)         | 2009 | Horikawa et al. [8]    | MIBC                        | UC           | Japanese                      | 26 (Dead) / 60 (Alive)                                            | Arg72Pro (rs1042522) | 17p13.1  | TP53   | C | G | 0.54 (1KG)        | HR (CC/CG+GG)=2.76                 | 1.11-6.84              | 0.028                  |
| MIBC Cancer-specific death (Radiotherapy-treated)       | 2014 | Teo et al. [9]         | MIBC (radiotherapy-treated) | Not reported | European (Denmark)            | 70 (Dead) / 116 (Alive)                                           | rs1805363            | 11q21    | MRE11  | A | G | 0.11 / 0.03 (1KG) | HR (A/G)=2.10                      | 1.34-3.28              | 0.001 (trend)          |
| UBC Cancer-specific death                               | 2005 | Eisenhardt et al. [10] | UBC                         | UC           | European (Germany)            | 65 (CT+TT) / 15 (TT)                                              | C825T (rs5443)       | 12p13.31 | GNB3   | T | C | 0.49 (1KG)        | HR (CT+TT/CC)=1.928                | 1.038-3.203            | 0.037 (log-rank)       |
| UBC Cancer-specific death                               | 2012 | Guirado et al. [5]     | UBC                         | UC           | European (Spain)              | Not reported                                                      | rs9302752            | 16q12.1  | NOD2   | A | G | 0.50 (1KG)        | HR (TT/CT+CC)=3.19                 | Not reported           | 0.006                  |
| <b>Associations for overall death:</b>                  |      |                        |                             |              |                               |                                                                   |                      |          |        |   |   |                   |                                    |                        |                        |
| <b>Associations reducing the risk of overall death:</b> |      |                        |                             |              |                               |                                                                   |                      |          |        |   |   |                   |                                    |                        |                        |
| MIBC Overall survival                                   | 2005 | Leibovici et al. [2]   | MIBC                        | Not reported | Caucasian (White)             | 105 (CG+CC) / 44 (GG)                                             | 174G/C (rs1800795)   | 7p15.3   | IL6    | C | G | 0.14 (1KG)        | HR (CG+CC/CC)=0.43                 | 0.19-0.94              | <0.05                  |
| MIBC Overall survival                                   | 2010 | Chen et al. [11]       | MIBC                        | UC           | Caucasian (Northern American) | 96 (Dead) / 128 (Alive) (AG/GG)<br>75 (Dead) / 91 (Alive) (AA/GG) | rs9906827            | 17q25.3  | RPTOR  | A | G | 0.42 (1KG)        | HR (AG/GG)=0.55<br>HR (AA/GG)=0.   | 0.36-0.84<br>0.34-0.88 | 0.006<br>0.01<br>0.002 |

|                        |      |                    |       |              |                               |                                                             |                       |               |             |                    |   |                       |                                          |                        |                           |
|------------------------|------|--------------------|-------|--------------|-------------------------------|-------------------------------------------------------------|-----------------------|---------------|-------------|--------------------|---|-----------------------|------------------------------------------|------------------------|---------------------------|
|                        |      |                    |       |              |                               | 125 (Dead) / 174 (Alive) (AA+AG/GG)                         |                       |               |             |                    |   | 54 HR (AG+AA/GG)=0.55 | 0.37-0.81                                |                        |                           |
| MIBC Overall survival  | 2013 | Lee et al. [12]    | MIBC  | UC           | Caucasian (Northern American) | 144 (Dead) / 181 (Alive)                                    | rs1051013             | 9q32          | RGS3        | A/C (not reported) | T | 0.84 (1KG)            | HR (??/TT)=0.44                          | 0.20-0.95              | 0.0362                    |
| MIBC Overall survival  | 2013 | Lee et al. [12]    | MIBC  | UC           | Caucasian (Northern American) | 144 (Dead) / 181 (Alive)                                    | rs1395960             | 1q23.3        | RGS5        | A                  | G | 0.24 (1KG)            | HR (AG/GG)=0.53                          | 0.29-0.96              | 0.0377                    |
| MIBC Overall survival  | 2013 | Lee et al. [12]    | MIBC  | UC           | Caucasian (Northern American) | 144 (Dead) / 181 (Alive)                                    | rs762861              | 4p16.3        | RGS12       | C                  | G | 0.36 (1KG)            | HR (CG/GG)=0.69                          | 0.48-0.98              | 0.0389                    |
| MIBC Overall survival  | 2015 | Zhou et al. [13]   | MIBC  | UC           | Chinese                       | 38 (Dead) / 118 (Alive)                                     | rs17855750            | 16p12.1-p11.2 | IL27        | G                  | T | 0.07 (1KG)            | OR (TG+GG / TT)= 0.2<br>OR (TG/TT)= 0.12 | 0.05-0.90<br>0.02-0.88 | 0.035<br>0.037            |
| NMIBC Overall survival | 2014 | Andrew et al. [14] | NMIBC | UC + Other   | Caucasian (Northern American) | 230 (Dead) / 333 (Alive), but not presented for NMIBC group | rs2662238             | 5q14.2        | XRCC4       | A                  | G | 0.36 (1KG)            | HR (GA/GG)=0.52                          | 0.37-0.72              | 0.016 (log-rank)          |
| UBC Overall survival   | 2007 | Sanyal et al. [15] | UBC   | Not reported | European (Sweden)             | 163 (AC+CC) / 97 (AA)                                       | K751Q (rs13181)       | 19q13.3       | XPD (ERCC2) | C                  | A | 0.24 (1KG)            | HR (AC+CC/AA)=0.6                        | 0.4-0.9                | 0.008                     |
| UBC Overall survival   | 2009 | Andrew et al. [16] | UBC   | Not reported | Caucasian (Northern American) | 100 (Died) / 319 (Alive)                                    | rs2854461             | 1q42.12       | EPHX1       | C                  | A | 0.64 (1KG)            | HR (C/A)=0.7                             | 0.5-1.0                | <0.05 and 0.02 (log-rank) |
| UBC Overall survival   | 2017 | Hess et al. [17]   | UBC   | UC           | European (Germany)            | 179 (Overall, death and progression)                        | rs2279115 (c.-938C>A) | 18q21.33      | BCL2        | A                  | C | 0.61 / 0.39 (1KG)     | HR (CC/AA)=0.24                          | 0.07-0.83              | 0.024                     |

|                                                           |      |                       |      |              |                               |                                                                         |            |         |        |   |   |            |                                       |                        |                |  |
|-----------------------------------------------------------|------|-----------------------|------|--------------|-------------------------------|-------------------------------------------------------------------------|------------|---------|--------|---|---|------------|---------------------------------------|------------------------|----------------|--|
|                                                           |      |                       |      |              |                               | counts not reported)                                                    |            |         |        |   |   |            |                                       |                        |                |  |
| UBC Overall survival                                      | 2009 | Mason et al. [18]     | UBC  | Not reported | Caucasian (Northern American) | Not reported                                                            | rs11543848 | 7p11.2  | EGFR   | A | G | 0.29 (1KG) | HR (AG+AA/GG)=0.3                     | 0.1-0.9                | <0.05          |  |
| UBC Overall survival                                      | 2009 | Mason et al. [18]     | UBC  | Not reported | Caucasian (Northern American) | Not reported                                                            | rs2017000  | 7p11.2  | EGFR   | G | A | 0.33 (1KG) | HR (GA+GG/AA)=0.6                     | 0.3-1.00               | <0.05          |  |
| UBC Overall survival (Chemotherapy-treated)               | 2013 | Sacerdote et al. [19] | UBC  | Not reported | European (Italy)              | 114 (Only reported overall)                                             | rs915927   | 19q13.2 | XRCC1  | G | A | 0.32 (1KG) | HR (G/A)=0.55                         | 0.32-0.94              | 0.03           |  |
| UBC Overall survival (Chemotherapy-treated)               | 2013 | Sacerdote et al. [19] | UBC  | Not reported | European (Italy)              | 123 (Only reported overall)                                             | rs762507   | 19q13.2 | XRCC1  | A | G | 0.29 (1KG) | HR (A/G)=0.48                         | 0.27-0.84              | 0.01           |  |
| UBC Overall survival (Chemotherapy-treated)               | 2013 | Sacerdote et al. [19] | UBC  | Not reported | European (Italy)              | 120 (Only reported overall)                                             | rs2854501  | 19q13.2 | XRCC1  | T | C | 0.82 (1KG) | HR (T/C)=0.25                         | 0.12-0.52              | 0.001          |  |
| UBC Overall survival (Chemotherapy-treated)               | 2013 | Sacerdote et al. [19] | UBC  | Not reported | European (Italy)              | 205 (Only reported overall)                                             | rs2854509  | 19q13.2 | XRCC1  | A | C | 0.18 (1KG) | HR (A/C)=0.21                         | 0.09-0.46              | 0.001          |  |
| UBC Overall survival (Chemotherapy-treated)               | 2013 | Sacerdote et al. [19] | UBC  | Not reported | European (Italy)              | 122 (Only reported overall)                                             | rs3213255  | 19q13.2 | XRCC1  | C | T | 0.32 (1KG) | HR (C/T)=0.46                         | 0.26-0.80              | 0.01           |  |
| <b>Associations increasing the risk of overall death:</b> |      |                       |      |              |                               |                                                                         |            |         |        |   |   |            |                                       |                        |                |  |
| MIBC Overall survival                                     | 2010 | Chen et al. [11]      | MIBC | UC           | Caucasian (Northern American) | 121 (Dead) / 169 (Alive) (GG/AA)<br>125 (Dead) / 175 (Alive) (GG+AG/AA) | rs10515074 | 5q13.1  | PIK3R1 | G | A | 0.20 (1KG) | HR (GA/AA)=1.88<br>HR (AG+AA/GG)=1.83 | 1.27-2.78<br>1.24-2.69 | 0.002<br>0.002 |  |

|                                                             |      |                    |                                           |    |                               |                                                                                                            |                 |          |       |   |   |                   |                                                          |                                     |                         |
|-------------------------------------------------------------|------|--------------------|-------------------------------------------|----|-------------------------------|------------------------------------------------------------------------------------------------------------|-----------------|----------|-------|---|---|-------------------|----------------------------------------------------------|-------------------------------------|-------------------------|
| MIBC Overall survival                                       | 2010 | Chen et al. [11]   | MIBC                                      | UC | Caucasian (Northern American) | 109 (Dead) / 166 (Alive) (AG/GG)<br>68 (Dead) / 108 (Alive) (AA/GG)<br>125 (Dead) / 177 (Alive) (AA+AG/GG) | rs3730050       | 19q13.2  | AKT2  | A | G | 0.25 (1KG)        | HR (AG/GG)=1.51<br>HR (AA/GG)=2.99<br>HR (AG+AA/GG)=1.68 | 1.02–2.23<br>1.65–5.42<br>1.16–2.44 | 0.05<br>0.0002<br>0.006 |
| MIBC Overall survival                                       | 2013 | Lee et al. [12]    | MIBC                                      | UC | Caucasian (Northern American) | 144 (Dead) / 181 (Alive)                                                                                   | rs2344673       | 1q23.3   | RGS5  | A | G | 0.05 (1KG)        | HR (A/G)=1.55                                            | 1.15–2.11                           | 0.0045                  |
| MIBC Overall survival                                       | 2013 | Lee et al. [12]    | MIBC                                      | UC | Caucasian (Northern American) | 144 (Dead) / 181 (Alive)                                                                                   | rs10917690      | 1q23.3   | RGS5  | G | A | 0.29 (1KG)        | HR (GG/AA)=1.88                                          | 1.19–2.96                           | 0.0066                  |
| MIBC Overall survival                                       | 2013 | Lee et al. [12]    | MIBC                                      | UC | Caucasian (Northern American) | 144 (Dead) / 181 (Alive)                                                                                   | rs1890398       | 1q31.2   | RGS2  | C | T | 0.56 (1KG)        | HR (CT/TT)=1.46                                          | 1.03–2.08                           | 0.0353                  |
| MIBC Overall survival                                       | 2013 | Lee et al. [12]    | MIBC                                      | UC | Caucasian (Northern American) | 144 (Dead) / 181 (Alive)                                                                                   | rs12035879      | 1q23.3   | RGS5  | G | A | 0.68 (1KG)        | HR (GG/AA)=1.65                                          | 1.02–2.66                           | 0.0387                  |
| MIBC Overall survival                                       | 2013 | Lee et al. [12]    | MIBC                                      | UC | Caucasian (Northern American) | 144 (Dead) / 181 (Alive)                                                                                   | rs10753605      | 1q23.3   | RGS5  | C | T | 0.35 (1KG)        | HR (CC/TT)=1.88                                          | 1.03–3.46                           | 0.0395                  |
| MIBC Overall survival                                       | 2013 | Djukic et al. [20] | MIBC                                      | UC | European (Serbia)             | 62 (Died) / 27 (Alive)                                                                                     | rs156697        | 10q25.1  | GSTO2 | G | A | 0.56 (1KG)        | HR (GG/AG+AA)=3.97                                       | 1.760–8.939                         | 0.001                   |
| MIBC Overall survival                                       | 2013 | Djukic et al. [20] | MIBC                                      | UC | European (Serbia)             | 62 (Died) / 27 (Alive)                                                                                     | rs4925          | 10q25.1  | GSTO1 | A | C | 0.18 (1KG)        | HR (AA/AC+CC)=2.94                                       | 1.164–7.430                         | 0.022                   |
| MIBC Overall survival (Platinum-based chemotherapy-treated) | 2016 | Xu et al. [21]     | Stage 4 UBC (treated with platinum-based) | UC | Chinese                       | 41 (Overall; death and progression counts not reported)                                                    | C118T (rs11615) | 19q13.32 | ERCC1 | T | C | 0.27 / 0.33 (1KG) | HR (CC / CT+TT)=1.94                                     | 1.17–3.27                           | 0.01                    |

|                        |      |                    | chemothe<br>rapy) |              |                               |                                                             |                   |          |               |   |   |            |                    |            |                             |
|------------------------|------|--------------------|-------------------|--------------|-------------------------------|-------------------------------------------------------------|-------------------|----------|---------------|---|---|------------|--------------------|------------|-----------------------------|
| NMIBC Overall survival | 2014 | Andrew et al. [14] | NMIBC             | UC + Other   | Caucasian (Northern American) | 230 (Dead) / 333 (Alive), but not presented for NMIBC group | rs4987059         | 11p15.5  | DRD4          | A | G | 0.04 (1KG) | HR (GA/GG)=1.83    | 1.18-2.85  | 0.024 (log-rank)            |
| NMIBC Overall survival | 2014 | Zhou et al. [22]   | NMIBC             | UC           | Chinese                       | 13 (Recurrence) / 176 (No recurrence)                       | rs3756712         | 5p15.33  | PDCD6         | G | T | 0.40 (1KG) | HR (GG/TT+GT)=5.11 | 1.43-18.22 | 0.01                        |
| UBC Overall survival   | 2007 | Sanyal et al. [6]  | UBC               | Not reported | European (Sweden)             | 113 (Dead) / 198 (Alive)                                    | R139W (rs4986998) | 16q22.1  | NQO1          | T | C | 0.02 (1KG) | HR (CT+TT/CC)=1.8  | 1.0-3.3    | 0.05                        |
| UBC Overall survival   | 2009 | Andrew et al. [16] | UBC               | Not reported | Caucasian (Northern American) | 100 (Died) / 212 (Alive)                                    | rs6024840         | 20q13.2  | AURKA         | C | T | 0.45 (1KG) | HR (C/T)=1.4       | 1.0-2.0    | <0.05                       |
| UBC Overall survival   | 2009 | Andrew et al. [16] | UBC               | Not reported | Caucasian (Northern American) | 100 (Died) / 325 (Alive)                                    | rs1042640         | 2q37.1   | UGT1A1        | C | G | 0.82 (1KG) | HR (C/G)=1.4       | 1.0-2.0    | <0.05                       |
| UBC Overall survival   | 2009 | Andrew et al. [16] | UBC               | Not reported | Caucasian (Northern American) | 101 (Died) / 326 (Alive)                                    | rs1126579         | 2q35     | IL8RB (CXCR2) | C | T | 0.60 (1KG) | HR (A/G)=1.7       | 1.2-2.5    | <0.05 and 0.003 (log-rank)  |
| UBC Overall survival   | 2009 | Andrew et al. [16] | UBC               | Not reported | Caucasian (Northern American) | 100 (Died) / 319 (Alive)                                    | rs528778          | 10p14    | GATA3         | T | C | 0.14 (1KG) | HR (T/C)=1.1       | 0.8-1.5    | <0.05 and <0.001 (log-rank) |
| UBC Overall survival   | 2009 | Andrew et al. [16] | UBC               | Not reported | Caucasian (Northern American) | 100 (Died) / 319 (Alive)                                    | rs1800067         | 16p13.12 | ERCC4         | A | G | 0.03 (1KG) | HR (A/G)=1.8       | 1.2-2.9    | <0.05                       |

|                                             |      |                       |     |              |                               |                                                          |                     |          |        |   |   |                   |                   |           |                            |
|---------------------------------------------|------|-----------------------|-----|--------------|-------------------------------|----------------------------------------------------------|---------------------|----------|--------|---|---|-------------------|-------------------|-----------|----------------------------|
| UBC Overall survival                        | 2009 | Andrew et al. [16]    | UBC | Not reported | Caucasian (Northern American) | 100 (Died) / 319 (Alive)                                 | rs1994251           | 20q11.21 | BCL2L1 | C | A | 0.24 (1KG)        | HR (C/A)=1.5      | 1.1-2.1   | <0.05 and 0.01 (log-rank)  |
| UBC Overall survival                        | 2009 | Andrew et al. [16]    | UBC | Not reported | Caucasian (Northern American) | 171 (Dead) / 300 (Alive)                                 | rs9282638           | 3q13.33  | CD80   | A | G | 0.87 (1KG)        | HR (A/G)=1.9      | 1.4-2.7   | <0.05 and 0.008 (log-rank) |
| UBC Overall survival                        | 2014 | Andrew et al. [16]    | UBC | UC + Other   | Caucasian (Northern American) | 230 (Dead) / 333 (Alive)                                 | rs3540231           | 8q11.23  | RB1CC1 | T | C | 0.02 (1KG)        | HR (CT/CC)=2.29   | 1.54-3.41 | 0.001 (log-rank)           |
| UBC Overall survival                        | 2017 | Hess et al. [17]      | UBC | UC           | European (Germany)            | 179 (Overall, death and progression counts not reported) | rs1801018 (c.21G>A) | 18q21.33 | BCL2   | A | G | 0.53 / 0.76 (1KG) | HR (AA/GG)=3.31   | 1.10-9.94 | 0.033                      |
| UBC Overall survival                        | 2009 | Mason et al. [18]     | UBC | Not reported | Caucasian (Northern American) | Not reported                                             | rs2293347           | 7p11.2   | EGFR   | T | C | 0.14 (1KG)        | HR (TC+TT/CC)=1.5 | 1.0-2.3   | <0.05                      |
| UBC Overall survival (Chemotherapy-treated) | 2013 | Sacerdote et al. [19] | UBC | Not reported | European (Italy)              | 121 (Only reported overall)                              | rs171140            | 19q13.3  | ERCC2  | C | A | 0.37 (1KG)        | HR (C/A)=2.07     | 1.06-4.28 | 0.03                       |

CI-confidence interval; EA-effect allele; EAF-effect allele frequency; MIBC-muscle-invasive bladder cancer; NMIBC-non-muscle-invasive bladder cancer; OR-odds ratio; RA-reference allele; SNP-single nucleotide polymorphism; UBC-urinary bladder cancer; UC-urothelial carcinoma; 1KG-1000 Genomes Project.

## 432 REFERENCES

433

- 434 1. Ryk C, Koskela LR, Thiel T, Wiklund NP, Steineck G, Schumacher MC, de Verdier PJ. Outcome after BCG treatment for urinary bladder  
435 cancer may be influenced by polymorphisms in the NOS2 and NOS3 genes. *Redox biology*. 2015;6:272-7.

- 436 2. Leibovici D, Grossman HB, Dinney CP, Millikan RE, Lerner S, Wang Y, Gu J, Dong Q, Wu X. Polymorphisms in inflammation genes and  
437 bladder cancer: from initiation to recurrence, progression, and survival. *Journal of clinical oncology : official journal of the American Society of*  
438 *Clinical Oncology*. 2005;23(24):5746-56.
- 439 3. Teo MT, Landi D, Taylor CF, Elliott F, Vaslin L, Cox DG, Hall J, Landi S, Bishop DT, Kiltie AE. The role of microRNA-binding site  
440 polymorphisms in DNA repair genes as risk factors for bladder cancer and breast cancer and their impact on radiotherapy outcomes.  
441 *Carcinogenesis*. 2012;33(3):581-6.
- 442 4. Shinohara A, Sakano S, Hinoda Y, Nishijima J, Kawai Y, Misumi T, Nagao K, Hara T, Matsuyama H. Association of TP53 and MDM2  
443 polymorphisms with survival in bladder cancer patients treated with chemoradiotherapy. *Cancer science*. 2009;100(12):2376-82.
- 444 5. Guirado M, Gil H, Saenz-Lopez P, Reinboth J, Garrido F, Cozar JM, Ruiz-Cabello F, Carretero R. Association between C13ORF31, NOD2,  
445 RIPK2 and TLR10 polymorphisms and urothelial bladder cancer. *Human immunology*. 2012;73(6):668-72.
- 446 6. Sanyal S, Ryk C, De Verdier PJ, Steineck G, Larsson P, Onelov E, Hemminki K, Kumar R. Polymorphisms in NQO1 and the clinical course of  
447 urinary bladder neoplasms. *Scandinavian journal of urology and nephrology*. 2007;41(3):182-90.
- 448 7. Castillejo A, Rothman N, Murta-Nascimento C, Malats N, Garcia-Closas M, Gomez-Martinez A, Lloreta J, Tardon A, Serra C, Garcia-Closas  
449 R, Chanock S, Silverman DT, Dosemeci M, Kogevinas M, Carrato A, Soto JL, Real FX. TGF $\beta$ 1 and TGF $\beta$ R1 polymorphic variants in relationship to  
450 bladder cancer risk and prognosis. *International journal of cancer*. 2009;124(3):608-13.
- 451 8. Horikawa Y, Nadaoka J, Saito M, Kumazawa T, Inoue T, Yuasa T, Tsuchiya N, Nishiyama H, Ogawa O, Habuchi T. Clinical implications of  
452 the MDM2 SNP309 and p53 Arg72Pro polymorphisms in transitional cell carcinoma of the bladder. *Oncology reports*. 2008;20(1):49-55.
- 453 9. Teo MT, Dyrskjot L, Nsengimana J, Buchwald C, Snowden H, Morgan J, Jensen JB, Knowles MA, Taylor G, Barrett JH, Borre M, Orntoft TF,  
454 Bishop DT, Kiltie AE. Next-generation sequencing identifies germline MRE11A variants as markers of radiotherapy outcomes in muscle-invasive  
455 bladder cancer. *Annals of oncology : official journal of the European Society for Medical Oncology*. 2014;25(4):877-83.
- 456 10. Eisenhardt A, Siffert W, Roskopf D, Musch M, Mosters M, Roggenbuck U, Jockel KH, Rubben H, Lummen G. Association study of the G-  
457 protein beta3 subunit C825T polymorphism with disease progression in patients with bladder cancer. *World journal of urology*.  
458 2005;23(4):279-86.
- 459 11. Chen M, Gu J, Delclos GL, Killary AM, Fan Z, Hildebrandt MA, Chamberlain RM, Grossman HB, Dinney CP, Wu X. Genetic variations of  
460 the PI3K-AKT-mTOR pathway and clinical outcome in muscle invasive and metastatic bladder cancer patients. *Carcinogenesis*. 2010;31(8):1387-  
461 91.
- 462 12. Lee EK, Ye Y, Kamat AM, Wu X. Genetic variations in regulator of G-protein signaling (RGS) confer risk of bladder cancer. *Cancer*.  
463 2013;119(9):1643-51.
- 464 13. Zhou B, Zhang P, Tang T, Liao H, Zhang K, Pu Y, Chen P, Song Y, Zhang L. Polymorphisms and plasma levels of IL-27: impact on genetic  
465 susceptibility and clinical outcome of bladder cancer. *BMC cancer*. 2015;15:433.

- 466 14. Andrew AS, Gui J, Hu T, Wyszynski A, Marsit CJ, Kelsey KT, Schned AR, Tanyos SA, Pendleton EM, Ekstrom RM, Li Z, Zens MS, Borsuk M,  
467 Moore JH, Karagas MR. Genetic polymorphisms modify bladder cancer recurrence and survival in a USA population-based prognostic study.  
468 *BJU international*. 2015;115(2):238-47.
- 469 15. Sanyal S, De Verdier PJ, Steineck G, Larsson P, Onelov E, Hemminki K, Kumar R. Polymorphisms in XPD, XPC and the risk of death in  
470 patients with urinary bladder neoplasms. *Acta oncologica (Stockholm, Sweden)*. 2007;46(1):31-41.
- 471 16. Andrew AS, Gui J, Sanderson AC, Mason RA, Morlock EV, Schned AR, Kelsey KT, Marsit CJ, Moore JH, Karagas MR. Bladder cancer SNP  
472 panel predicts susceptibility and survival. *Human genetics*. 2009;125(5-6):527-39.
- 473 17. Hess J, Stelmach P, Eisenhardt A, Rubben H, Reis H, Schmid KW, Bachmann HS. Impact of BCL2 polymorphisms on survival in  
474 transitional cell carcinoma of the bladder. *Journal of cancer research and clinical oncology*. 2017;143(9):1659-70.
- 475 18. Mason RA, Morlock EV, Karagas MR, Kelsey KT, Marsit CJ, Schned AR, Andrew AS. EGFR pathway polymorphisms and bladder cancer  
476 susceptibility and prognosis. *Carcinogenesis*. 2009;30(7):1155-60.
- 477 19. Sacerdote C, Guarrera S, Ricceri F, Pardini B, Polidoro S, Allione A, Critelli R, Russo A, Andrew AS, Ye Y, Wu X, Kiemeny LA, Bosio A,  
478 Casetta G, Cucchiara G, Destefanis P, Gontero P, Rolle L, Zitella A, Fontana D, Vineis P, Matullo G. Polymorphisms in the XRCC1 gene modify  
479 survival of bladder cancer patients treated with chemotherapy. *International journal of cancer*. 2013;133(8):2004-9.
- 480 20. Djukic TI, Savic-Radojevic AR, Pekmezovic TD, Matic MG, Pljesa-Ercegovac MS, Coric VM, Radic TM, Suvakov SR, Krivic BN, Dragicevic  
481 DP, Simic TP. Glutathione S-transferase T1, O1 and O2 polymorphisms are associated with survival in muscle invasive bladder cancer patients.  
482 *PLoS ONE*. 2013;8(9):e74724.
- 483 21. Xu ZC, Cai HZ, Li X, Xu WZ, Xu T, Yu B, Zou Q, Xu L. ERCC1 C118T polymorphism has predictive value for platinum-based chemotherapy  
484 in patients with late-stage bladder cancer. *Genetics and molecular research : GMR*. 2016;15(2).
- 485 22. Zhou B, Zhang P, Tang T, Zhang K, Wang Y, Song Y, Liao H, Zhang L. Prognostic value of PDCD6 polymorphisms and the susceptibility to  
486 bladder cancer. *Tumour biology : the journal of the International Society for Oncodevelopmental Biology and Medicine*. 2014;35(8):7547-54.  
487



488 Supplementary Table 10. Gene clusters by functional annotation for urinary bladder cancer  
 489 recurrence (DAVID tool).

|                                                    | Term*                                                   | Genes               | Bonferroni-adjusted p-value | FDR, % |
|----------------------------------------------------|---------------------------------------------------------|---------------------|-----------------------------|--------|
| Annotation Cluster 1<br><br>Enrichment Score: 2.72 | IPR024066:Regulator of G-protein signaling domain 1     | RGS10, RGS16, RGS13 | 0.04                        | 0.43   |
|                                                    | domain:RGS                                              | RGS10, RGS16, RGS13 | 0.12                        | 0.93   |
|                                                    | SM00315:RGS                                             | RGS10, RGS16, RGS13 | 0.03                        | 1.19   |
|                                                    | IPR016137:Regulator of G protein signalling superfamily | RGS10, RGS16, RGS13 | 0.11                        | 1.35   |
|                                                    | Signal transduction inhibitor                           | RGS10, RGS16, RGS13 | 0.15                        | 1.55   |
|                                                    | GO:0005096~GTPase activator activity                    | RGS10, RGS16, RGS13 | 1.00                        | 52.55  |
| Annotation Cluster 2<br><br>Enrichment Score: 2.42 | GO:0007442~hindgut morphogenesis                        | GLI2, GLI3, SHH     | 0.01                        | 0.02   |
|                                                    | hsa04340:Hedgehog signaling pathway                     | GLI2, GLI3, SHH     | 0.29                        | 3.34   |
|                                                    | GO:0042475~odontogenesis of dentin-containing tooth     | GLI2, GLI3, SHH     | 0.85                        | 4.38   |
|                                                    | GO:0042733~embryonic digit morphogenesis                | GLI2, GLI3, SHH     | 0.86                        | 4.54   |
|                                                    | GO:0007224~smoothened signaling pathway                 | GLI2, GLI3, SHH     | 0.95                        | 6.76   |
|                                                    | GO:0030324~lung development                             | GLI2, GLI3, SHH     | 0.97                        | 8.11   |
|                                                    | h_shhPathway:Sonic Hedgehog (Shh) Pathway               | GLI2, GLI3, SHH     | 0.45                        | 8.75   |
|                                                    | hsa05217:Basal cell carcinoma                           | GLI2, GLI3, SHH     | 0.74                        | 12.39  |
|                                                    | GO:0007411~axon guidance                                | GLI2, GLI3, SHH     | 1.00                        | 29.44  |
|                                                    | GO:0007507~heart development                            | GLI2, GLI3, SHH     | 1.00                        | 36.49  |

\* As listed in DAVID  
 FDR-false discovery rate

491 Supplementary Table 11. Enrichment in functional pathways for genes reported for bladder  
 492 cancer recurrence (DAVID tool).

| Term*                                                                           | Genes list                                                                                                                                                   | Bonferroni-adjusted p value | FDR, % |
|---------------------------------------------------------------------------------|--------------------------------------------------------------------------------------------------------------------------------------------------------------|-----------------------------|--------|
| hsa05200:Pathways in cancer                                                     | CXCL8, NFKBIA, IGF1, CDH1, BIRC5, GLI2, GLI3, MMP2, SHH                                                                                                      | 0.001                       | 0.01   |
| GO:0007442~hindgut morphogenesis                                                | GLI2, GLI3, SHH                                                                                                                                              | 0.008                       | 0.02   |
| GO:0045944~positive regulation of transcription from RNA polymerase II promoter | VDR, SLC11A1, IL17A, IFNG, NFKBIA, IGF1, GLI2, GLI3, SHH                                                                                                     | 0.04                        | 0.09   |
| GO:0048566~embryonic digestive tract development                                | CXCL8, GLI2, GLI3                                                                                                                                            | 0.15                        | 0.37   |
| IPR024066:Regulator of G-protein signaling domain 1                             | RGS10, RGS16, RGS13                                                                                                                                          | 0.04                        | 0.43   |
| GO:0043066~negative regulation of apoptotic process                             | NFKBIA, IGF1, BIRC5, GLI2, GLI3, SHH                                                                                                                         | 0.26                        | 0.72   |
| domain:RGS                                                                      | RGS10, RGS16, RGS13                                                                                                                                          | 0.12                        | 0.93   |
| GO:0000060~protein import into nucleus translocation                            | SLC11A1, IFNG, NFKBIA                                                                                                                                        | 0.39                        | 1.16   |
| sequence variant                                                                | ICAM1, CWC27, NEIL2, NFKBIA, IGF1, CDH1, BIRC5, SOD1, RGS16, GLI2, GLI3, MMP2, SHH, RGS13, GSS, DROSHA, SLC11A1, RGS10, VDR, ERCC6, GPX4, IFNG, ALDH2, DDX20 | 0.13                        | 1.01   |
| mutagenesis site                                                                | DROSHA, VDR, GPX4, NEIL2, NFKBIA, CDH1, BIRC5, RGS16, SOD1, SHH                                                                                              | 0.13                        | 1.05   |
| IPR016137:Regulator of G protein signalling superfamily                         | RGS10, RGS16, RGS13                                                                                                                                          | 0.11                        | 1.35   |
| Signal transduction inhibitor                                                   | RGS10, RGS16, RGS14                                                                                                                                          | 0.15                        | 1.55   |
| SM00315:RGS                                                                     | RGS10, RGS16, RGS15                                                                                                                                          | 0.03                        | 1.19   |
| GO:0005615~extracellular space                                                  | ICAM1, IL17A, IFNG, CXCL8, IGF1, SOD1, MMP2, SHH                                                                                                             | 0.15                        | 1.90   |
| Disease mutation                                                                | GSS, VDR, ERCC6, NFKBIA, CDH1, GLI2, SOD1, GLI3, MMP2, SHH                                                                                                   | 0.23                        | 2.45   |
| hsa05323:Rheumatoid arthritis                                                   | ICAM1, IL17A, IFNG, CXCL8                                                                                                                                    | 0.23                        | 2.56   |
| hsa04340:Hedgehog signaling pathway                                             | GLI2, GLI3, SHH                                                                                                                                              | 0.29                        | 3.34   |
| GO:0042475~odontogenesis of dentin-containing tooth                             | GLI2, GLI3, SHH                                                                                                                                              | 0.85                        | 4.38   |
| GO:0042733~embryonic digit morphogenesis                                        | GLI2, GLI3, SHH                                                                                                                                              | 0.86                        | 4.54   |
| h_freePathway:Free Radical Induced Apoptosis                                    | GSS, CXCL8, SOD1                                                                                                                                             | 0.21                        | 3.47   |

\*As listed in DAVID.  
 FDR-false discovery rate

494 Supplementary Table 12. Enrichment in functional pathways for genes reported for bladder  
 495 cancer death (DAVID tool).

| Term*                                            | Genes list                                                                                                          | Bonferroni-adjusted p value | FDR, % |
|--------------------------------------------------|---------------------------------------------------------------------------------------------------------------------|-----------------------------|--------|
| hsa05212:Pancreatic cancer                       | TGFBR1, BCL2L1, PIK3R1, AKT2                                                                                        | 0.05                        | 0.47   |
| GO:0046326~positive regulation of glucose import | PIK3R1, TERT, AKT2                                                                                                  | 0.22                        | 0.74   |
| Ubl conjugation                                  | XRCC4, RGS3, TGFBR1, DRD4, AURKA, PIK3R1, TERT, AKT2                                                                | 0.06                        | 0.61   |
| hsa05220:Chronic myeloid leukemia                | TGFBR1, BCL2L1, PIK3R1, AKT2                                                                                        | 0.06                        | 0.64   |
| GO:0005829~cytosol                               | XRCC4, RGS3, RB1CC1, AURKA, GSTO2, GNB3, BCL2L1, PIK3R1, RPTOR, AKT2, MRE11                                         | 0.06                        | 0.79   |
| GO:0007165~signal transduction                   | RGS12, TGFBR1, GATA3, CXCR2, GNB3, PIK3R1, AKT2                                                                     | 0.47                        | 1.89   |
| hsa05166:HTLV-I infection                        | TGFBR1, BCL2L1, PIK3R1, TERT, AKT2                                                                                  | 0.24                        | 2.63   |
| Phosphoprotein                                   | XRCC4, TGFBR1, CXCR2, AURKA, BCL2L1, RPTOR, MRE11, RGS12, CD80, RGS3, GATA3, RB1CC1, TERT, PIK3R1, AKT2             | 0.29                        | 3.45   |
| Transferase                                      | TGFBR1, AURKA, GSTO2, UGT1A1, PIK3R1, TERT, AKT2                                                                    | 0.31                        | 3.78   |
| GO:0005515~protein binding                       | XRCC4, TGFBR1, DRD4, CXCR2, AURKA, BCL2L1, RPTOR, MRE11, CD80, RGS3, GATA3, RB1CC1, GSTO2, GNB3, TERT, PIK3R1, AKT2 | 0.37                        | 4.23   |

\*As listed in DAVID  
 FDR-false discovery rate.

496

497

498
